# Supplementary material for: Genome-Wide Associations between Genetic and Epigenetic Variation Influence mRNA Expression and Insulin Secretion in Human Pancreatic Islets
Source: PubMed Central journal article supplement (PMC4222689; doi:10.1371/journal.pgen.1004735), 2014-11-06
Supplement: pgen.1004735.s017.pdf [file pgen.1004735.s017.pdf]

**Table S9** KEGG pathways with enrichment of genes showing differential expression between genotype groups in the eQTL analysis of *cis*-mQTL-SNPs

| Pathway (total number of genes in pathway)        | Observed number of genes | Expected number of genes | Ratio of enrichment | Raw <i>P</i> -value   | Adjusted <i>P</i> -value | Observed genes            |
|---------------------------------------------------|--------------------------|--------------------------|---------------------|-----------------------|--------------------------|---------------------------|
| Glutathione metabolism (45)                       | 3                        | 0.08                     | 35.56               | 8.09x10 <sup>-5</sup> | 0.0003                   | <i>GSTT1, GSTM3, GPX7</i> |
| Drug metabolism - cytochrome P450 (53)            | 2                        | 0.10                     | 20.13               | 0.0044                | 0.0059                   | <i>GSTT1, GSTM3</i>       |
| Metabolism of xenobiotics by cytochrome P450 (53) | 2                        | 0.10                     | 20.13               | 0.0044                | 0.0059                   | <i>GSTT1, GSTM3</i>       |

P-values have been adjusted for multiple testing using Benjamini-Hochberg
