# Supplementary material for: Genome-Wide Associations between Genetic and Epigenetic Variation Influence mRNA Expression and Insulin Secretion in Human Pancreatic Islets
Source: PubMed Central journal article supplement (PMC4222689; doi:10.1371/journal.pgen.1004735), 2014-11-06
Supplement: pgen.1004735.s021.pdf [file pgen.1004735.s021.pdf]

**Table S13** Identified *cis*-mQTLs where methylation of CpG sites is potential mediators of genetic association with insulin secretion in human pancreatic islets

| CpG        |                     |             |     |           | SNP        |     |           | G vs M |          | G vs I |         | CIT     |
|------------|---------------------|-------------|-----|-----------|------------|-----|-----------|--------|----------|--------|---------|---------|
| CpG Id     | Gene                | Gene Region | Chr | Pos       | Id         | Chr | Pos       | T-Stat | P-Value  | T-Stat | P-Value | P-Value |
| cg23231268 | -                   | Intergenic  | 3   | 46792462  | rs6763438  | 3   | 46778988  | -7.26  | 0.022    | -0.38  | 0.010   | 0.011   |
| cg23231268 | -                   | Intergenic  | 3   | 46792462  | rs7614762  | 3   | 46790397  | -7.26  | 0.022    | -0.38  | 0.010   | 0.011   |
| cg23231268 | -                   | Intergenic  | 3   | 46792462  | rs6810260  | 3   | 46783432  | -7.56  | 0.0056   | -0.41  | 0.006   | 0.016   |
| cg07207484 | <i>PTPRN2</i>       | Gene Body   | 7   | 158316262 | rs7810884  | 7   | 158276926 | -8.47  | 8.99E-05 | 0.33   | 0.025   | 0.017   |
| cg08381504 | -                   | Intergenic  | 3   | 46792357  | rs6763438  | 3   | 46778988  | -7.46  | 0.0088   | -0.38  | 0.010   | 0.022   |
| cg08381504 | -                   | Intergenic  | 3   | 46792357  | rs7614762  | 3   | 46790397  | -7.46  | 0.0088   | -0.38  | 0.010   | 0.022   |
| cg08381504 | -                   | Intergenic  | 3   | 46792357  | rs6810260  | 3   | 46783432  | -8.27  | 0.00023  | -0.41  | 0.006   | 0.032   |
| cg05124692 | <i>PADI4</i>        | TSS1500     | 1   | 17633195  | rs2477142  | 1   | 17629004  | -10.36 | 1.72E-08 | -0.41  | 0.000   | 0.034   |
| cg02884280 | <i>LOC100130581</i> | TSS200      | 17  | 41466285  | rs6503721  | 17  | 41127448  | 7.61   | 0.0044   | 0.28   | 0.025   | 0.039   |
| cg02884280 | <i>LOC100130581</i> | TSS200      | 17  | 41466285  | rs455055   | 17  | 41167957  | 8.32   | 0.00018  | 0.33   | 0.011   | 0.042   |
| cg27396498 | <i>CES4</i>         | TSS200      | 16  | 55794478  | rs8192946  | 16  | 55848218  | -8.46  | 9.50E-05 | -0.35  | 0.020   | 0.042   |
| cg27396498 | <i>CES4</i>         | TSS200      | 16  | 55794478  | rs1968753  | 16  | 55845351  | -8.62  | 4.56E-05 | -0.36  | 0.013   | 0.043   |
| cg22309949 | -                   | Intergenic  | 3   | 46792192  | rs6810260  | 3   | 46783432  | -7.97  | 0.00088  | -0.41  | 0.006   | 0.046   |
| cg10769313 | -                   | Intergenic  | 19  | 15871084  | rs10426753 | 19  | 15886084  | 7.35   | 0.015    | -0.32  | 0.011   | 0.048   |

Causal Inference Test (CIT) was used to test if associations between SNPs identified in the *cis*-mQTL analysis and islets insulin secretion was mediated by DNA methylation of CpG sites.

G vs M: Adjusted associations between genotype (G) and DNA methylation (M) – *cis*-mQTL analysis. P-values corrected for multiple testing based on number of independent tests performed.

G vs I: Adjusted associations between genotype (G) and human islet insulin secretion measured as stimulation index (I).

CIT: Causal hypothesis P-value < 0.05 showing that genotype (G) and islet insulin secretion (I) relationship is considered mediated through DNA methylation (M).
