# Supplementary material for: Genome-Wide Associations between Genetic and Epigenetic Variation Influence mRNA Expression and Insulin Secretion in Human Pancreatic Islets
Source: PLoS Genet. 2014 Nov 6;10(11):e1004735. doi: 10.1371/journal.pgen.1004735 (PMC4222689; doi:10.1371/journal.pgen.1004735)
Supplement: Table S22 — Identified trans-mQTLs of imputed genotype data. Presents all trans-mQTLs showing significant association between SNP genotype including imputed genotype data and CpG DNA methylation after correction for multiple testing. Imputed autosomal genotype data generated with the HumanOmniExpressBeadChip for islet donors to the 1000 Genomes phase 1. All SNP-CpG pairs not located in cis were considered as trans-mQTLs. Annotation of SNPs to significant cis-mQTLs based on genome build 37. Annotation of CpGs based on genome build 37 and Infinium HumanMethylation 450 BeadChip (Illumina) [39]. (XLSX) [file pgen.1004735.s030.xlsx]

## Sheet: trans-mQTL Imputed SNPs
SNP	CpG Site_Illumina Probe ID	T-Stat SNPvsCpG	Corrected P-Value SNPvsCpG	SNP_Chr	SNP_Mapinfo	SNP_Genotyped/Imputed	SNP_Minor allele	SNP_MAF	CpG Site_Chr	CpG Site_Mapinfo	CpG Site_UCSC Refgene Name	CpG Site_Refgene Group
chr17:44246689:D	cg22968622	35.7924	5.59e-40	17	44246689	Imputed	G	0.127621	17	43663579		Intergenic
rs75330746	cg22968622	35.7832	5.7e-40	17	44182955	Imputed	T	0.129607	17	43663579		Intergenic
rs75183956	cg22968622	35.7815	5.72e-40	17	44182956	Imputed	G	0.129612	17	43663579		Intergenic
rs143852331	cg22968622	35.6011	8.42e-40	17	44356394	Imputed	G	0.128781	17	43663579		Intergenic
rs146104393	cg22968622	35.592	8.58e-40	17	44356410	Imputed	C	0.128771	17	43663579		Intergenic
chr17:44284962:I	cg22968622	35.5382	9.63e-40	17	44284962	Imputed	AG	0.129596	17	43663579		Intergenic
rs111250307	cg22968622	35.4969	1.05e-39	17	44357304	Imputed	T	0.129955	17	43663579		Intergenic
chr17:44365486:I	cg22968622	35.431	1.21e-39	17	44365486	Imputed	ACT	0.127152	17	43663579		Intergenic
rs142704107	cg22968622	35.4098	1.27e-39	17	44311668	Imputed	T	0.130541	17	43663579		Intergenic
rs111673945	cg22968622	35.4059	1.28e-39	17	44333423	Imputed	T	0.129725	17	43663579		Intergenic
rs113986870	cg22968622	35.3918	1.32e-39	17	44355683	Imputed	A	0.131843	17	43663579		Intergenic
rs117938360	cg22968622	35.3865	1.33e-39	17	44269510	Imputed	G	0.132022	17	43663579		Intergenic
rs116853517	cg22968622	35.3852	1.34e-39	17	44182917	Imputed	G	0.132041	17	43663579		Intergenic
rs143463837	cg22968622	35.3823	1.35e-39	17	44281821	Imputed	C	0.128973	17	43663579		Intergenic
rs111676341	cg22968622	35.3579	1.42e-39	17	44183403	Imputed	G	0.131843	17	43663579		Intergenic
rs188248721	cg22968622	35.3558	1.42e-39	17	44324257	Imputed	T	0.136528	17	43663579		Intergenic
rs117529362	cg22968622	35.3489	1.45e-39	17	44172773	Imputed	T	0.131091	17	43663579		Intergenic
rs143984253	cg22968622	35.3271	1.52e-39	17	44311529	Imputed	C	0.12691	17	43663579		Intergenic
rs150507834	cg22968622	35.3231	1.53e-39	17	44338966	Imputed	C	0.127972	17	43663579		Intergenic
rs111471804	cg22968622	35.3113	1.57e-39	17	44335752	Imputed	C	0.131082	17	43663579		Intergenic
rs117101410	cg22968622	35.3017	1.6e-39	17	44311484	Imputed	A	0.132191	17	43663579		Intergenic
rs146676063	cg22968622	35.275	1.7e-39	17	44335274	Imputed	A	0.131539	17	43663579		Intergenic
rs191808086	cg22968622	35.2709	1.71e-39	17	44307254	Imputed	G	0.128652	17	43663579		Intergenic
rs111920741	cg22968622	35.2493	1.79e-39	17	44333412	Imputed	A	0.126395	17	43663579		Intergenic
rs117174664	cg22968622	35.2495	1.79e-39	17	44262758	Imputed	T	0.130556	17	43663579		Intergenic
rs113314058	cg22968622	35.2446	1.81e-39	17	44356436	Imputed	C	0.130827	17	43663579		Intergenic
rs146855054	cg22968622	35.23	1.87e-39	17	44188764	Imputed	C	0.130546	17	43663579		Intergenic
rs111915242	cg22968622	35.2254	1.89e-39	17	44333568	Imputed	C	0.131318	17	43663579		Intergenic
rs150592114	cg22968622	35.2252	1.89e-39	17	44333331	Imputed	G	0.129737	17	43663579		Intergenic
rs138971419	cg22968622	35.2227	1.9e-39	17	44297433	Imputed	T	0.130058	17	43663579		Intergenic
rs139131949	cg22968622	35.1887	2.04e-39	17	44349169	Imputed	C	0.133938	17	43663579		Intergenic
rs113613291	cg22968622	35.1793	2.09e-39	17	44344239	Imputed	T	0.126584	17	43663579		Intergenic
rs116911373	cg22968622	35.1389	2.28e-39	17	44235765	Imputed	A	0.130118	17	43663579		Intergenic
rs111952249	cg22968622	35.133	2.31e-39	17	44357491	Imputed	A	0.129921	17	43663579		Intergenic
chr17:44262580:I	cg22968622	35.1294	2.32e-39	17	44262580	Imputed	AC	0.134157	17	43663579		Intergenic
rs141211409	cg22968622	35.1306	2.32e-39	17	44314522	Imputed	G	0.1279	17	43663579		Intergenic
rs141486343	cg22968622	35.13	2.32e-39	17	44354231	Imputed	G	0.136287	17	43663579		Intergenic
rs113748556	cg22968622	35.1176	2.38e-39	17	44345434	Imputed	G	0.132266	17	43663579		Intergenic
rs117805436	cg22968622	35.1153	2.4e-39	17	44351533	Imputed	G	0.136197	17	43663579		Intergenic
rs117989086	cg22968622	35.1134	2.41e-39	17	44350395	Imputed	C	0.133659	17	43663579		Intergenic
rs117044344	cg22968622	35.1057	2.45e-39	17	44256053	Imputed	A	0.130826	17	43663579		Intergenic
rs118166887	cg22968622	35.1047	2.45e-39	17	44294105	Imputed	T	0.134292	17	43663579		Intergenic
chr17:44349150:D	cg22968622	35.1032	2.46e-39	17	44349150	Imputed	C	0.134226	17	43663579		Intergenic
chr17:44166362:I	cg22968622	35.0884	2.54e-39	17	44166362	Imputed	GA	0.134288	17	43663579		Intergenic
rs143688924	cg22968622	35.081	2.58e-39	17	44305026	Imputed	A	0.135685	17	43663579		Intergenic
rs141092216	cg22968622	35.0754	2.61e-39	17	44332429	Imputed	T	0.131494	17	43663579		Intergenic
rs62060952	cg22968622	35.0559	2.72e-39	17	44273398	Imputed	T	0.132921	17	43663579		Intergenic
rs113343751	cg22968622	35.0423	2.81e-39	17	44333532	Imputed	G	0.126449	17	43663579		Intergenic
rs117347612	cg22968622	35.0387	2.83e-39	17	44256296	Imputed	A	0.130899	17	43663579		Intergenic
rs117671932	cg22968622	35.0354	2.85e-39	17	44342327	Imputed	G	0.13523	17	43663579		Intergenic
rs145067525	cg22968622	35.0306	2.88e-39	17	44179723	Imputed	C	0.132895	17	43663579		Intergenic
chr17:44273444:I	cg22968622	35.0232	2.93e-39	17	44273444	Imputed	CA	0.134384	17	43663579		Intergenic
chr17:44172492:I	cg22968622	35.0139	2.98e-39	17	44172492	Imputed	TA	0.134449	17	43663579		Intergenic
rs145251141	cg22968622	35.0114	3e-39	17	44232721	Imputed	A	0.134433	17	43663579		Intergenic
rs117632628	cg22968622	35.0103	3.01e-39	17	44256655	Imputed	A	0.130951	17	43663579		Intergenic
rs113159473	cg22968622	35.0088	3.02e-39	17	44355113	Imputed	T	0.130996	17	43663579		Intergenic
rs117037470	cg22968622	35.0053	3.04e-39	17	44252461	Imputed	G	0.125302	17	43663579		Intergenic
rs118045117	cg22968622	35.0053	3.04e-39	17	44252468	Imputed	A	0.125302	17	43663579		Intergenic
rs150153238	cg22968622	35.0046	3.05e-39	17	44324572	Imputed	G	0.138762	17	43663579		Intergenic
rs117964243	cg22968622	34.9992	3.08e-39	17	44257788	Imputed	C	0.131511	17	43663579		Intergenic
rs117711388	cg22968622	34.9945	3.11e-39	17	44171554	Imputed	A	0.1345	17	43663579		Intergenic
rs112837971	cg22968622	34.9933	3.12e-39	17	44279347	Imputed	C	0.134506	17	43663579		Intergenic
rs150310985	cg22968622	34.9933	3.12e-39	17	44296224	Imputed	T	0.134468	17	43663579		Intergenic
chr17:44207415:I	cg22968622	34.9894	3.15e-39	17	44207415	Imputed	GGTGGCAT	0.133629	17	43663579		Intergenic
chr17:44277168:D	cg22968622	34.9844	3.18e-39	17	44277168	Imputed	A	0.132872	17	43663579		Intergenic
rs148292931	cg22968622	34.9845	3.18e-39	17	44236108	Imputed	C	0.13318	17	43663579		Intergenic
rs112428092	cg22968622	34.9826	3.19e-39	17	44260845	Imputed	A	0.134506	17	43663579		Intergenic
rs117360635	cg22968622	34.984	3.19e-39	17	44214814	Imputed	A	0.1345	17	43663579		Intergenic
rs117569148	cg22968622	34.9826	3.19e-39	17	44258446	Imputed	G	0.134506	17	43663579		Intergenic
rs117610308	cg22968622	34.9837	3.19e-39	17	44293671	Imputed	G	0.134254	17	43663579		Intergenic
rs118127111	cg22968622	34.984	3.19e-39	17	44214815	Imputed	G	0.1345	17	43663579		Intergenic
rs117439419	cg22968622	34.9808	3.21e-39	17	44169377	Imputed	C	0.134507	17	43663579		Intergenic
rs138096595	cg22968622	34.9782	3.23e-39	17	44190156	Imputed	C	0.134517	17	43663579		Intergenic
rs117072135	cg22968622	34.9759	3.24e-39	17	44349079	Imputed	A	0.134517	17	43663579		Intergenic
rs118057691	cg22968622	34.9759	3.24e-39	17	44349080	Imputed	G	0.134517	17	43663579		Intergenic
rs146057550	cg22968622	34.9759	3.24e-39	17	44348753	Imputed	C	0.134517	17	43663579		Intergenic
rs148729798	cg22968622	34.9759	3.24e-39	17	44348768	Imputed	G	0.134517	17	43663579		Intergenic
rs113073249	cg22968622	34.9744	3.25e-39	17	44232616	Imputed	T	0.134517	17	43663579		Intergenic
rs113249873	cg22968622	34.9742	3.25e-39	17	44279405	Imputed	T	0.13453	17	43663579		Intergenic
rs113727582	cg22968622	34.9735	3.26e-39	17	44364958	Imputed	A	0.131376	17	43663579		Intergenic
rs75670619	cg22968622	34.974	3.26e-39	17	44304203	Imputed	C	0.134545	17	43663579		Intergenic
chr17:44185426:D	cg22968622	34.9717	3.27e-39	17	44185426	Imputed	G	0.134534	17	43663579		Intergenic
rs149440682	cg22968622	34.9713	3.27e-39	17	44274838	Imputed	A	0.134545	17	43663579		Intergenic
rs113783573	cg22968622	34.9705	3.28e-39	17	44296355	Imputed	A	0.134551	17	43663579		Intergenic
rs117753289	cg22968622	34.9693	3.29e-39	17	44203311	Imputed	T	0.134534	17	43663579		Intergenic
chr17:44267801:I	cg22968622	34.9667	3.31e-39	17	44267801	Imputed	AT	0.133135	17	43663579		Intergenic
chr17:44274562:I	cg22968622	34.9642	3.32e-39	17	44274562	Imputed	CA	0.134327	17	43663579		Intergenic
rs117850622	cg22968622	34.9626	3.34e-39	17	44269493	Imputed	C	0.134546	17	43663579		Intergenic
rs188918054	cg22968622	34.9623	3.34e-39	17	44338536	Imputed	C	0.137855	17	43663579		Intergenic
rs117266894	cg22968622	34.9614	3.35e-39	17	44227882	Imputed	G	0.13453	17	43663579		Intergenic
rs112994064	cg22968622	34.9578	3.37e-39	17	44357517	Imputed	C	0.131226	17	43663579		Intergenic
rs117783809	cg22968622	34.9537	3.4e-39	17	44287390	Imputed	G	0.134573	17	43663579		Intergenic
rs150278591	cg22968622	34.9506	3.42e-39	17	44242759	Imputed	T	0.133225	17	43663579		Intergenic
rs117667559	cg22968622	34.9502	3.43e-39	17	44253275	Imputed	C	0.125511	17	43663579		Intergenic
rs117886735	cg22968622	34.9456	3.46e-39	17	44277707	Imputed	G	0.134288	17	43663579		Intergenic
chr17:44184819:D	cg22968622	34.9438	3.48e-39	17	44184819	Imputed	C	0.134985	17	43663579		Intergenic
rs117392217	cg22968622	34.9436	3.48e-39	17	44232959	Imputed	A	0.135949	17	43663579		Intergenic
rs138607321	cg22968622	34.9433	3.48e-39	17	44331214	Imputed	C	0.134545	17	43663579		Intergenic
rs113667075	cg22968622	34.9398	3.51e-39	17	44340328	Imputed	C	0.135966	17	43663579		Intergenic
chr17:44225958:I	cg22968622	34.9383	3.52e-39	17	44225958	Imputed	TC	0.132961	17	43663579		Intergenic
rs113896715	cg22968622	34.9371	3.53e-39	17	44356746	Imputed	C	0.132961	17	43663579		Intergenic
rs116883054	cg22968622	34.9338	3.55e-39	17	44255143	Imputed	G	0.134569	17	43663579		Intergenic
rs117853176	cg22968622	34.9286	3.59e-39	17	44189408	Imputed	C	0.134601	17	43663579		Intergenic
rs117120492	cg22968622	34.9281	3.6e-39	17	44258938	Imputed	A	0.13473	17	43663579		Intergenic
rs117852576	cg22968622	34.9276	3.6e-39	17	44275230	Imputed	T	0.134393	17	43663579		Intergenic
rs142704860	cg22968622	34.9277	3.6e-39	17	44331242	Imputed	G	0.134567	17	43663579		Intergenic
rs117037949	cg22968622	34.925	3.62e-39	17	44270809	Imputed	G	0.135125	17	43663579		Intergenic
rs2243967	cg22968622	34.9226	3.64e-39	17	44329636	Imputed	C	0.134663	17	43663579		Intergenic
chr17:44275172:I	cg22968622	34.919	3.67e-39	17	44275172	Imputed	ACT	0.135567	17	43663579		Intergenic
rs143995284	cg22968622	34.9193	3.67e-39	17	44297236	Imputed	A	0.13281	17	43663579		Intergenic
rs112493812	cg22968622	34.9145	3.7e-39	17	44314179	Imputed	A	0.134635	17	43663579		Intergenic
rs117205569	cg22968622	34.9121	3.72e-39	17	44255002	Imputed	A	0.1344	17	43663579		Intergenic
rs113951568	cg22968622	34.8896	3.91e-39	17	44356793	Imputed	G	0.13526	17	43663579		Intergenic
rs117016088	cg22968622	34.8902	3.91e-39	17	44223243	Imputed	A	0.135219	17	43663579		Intergenic
rs142850400	cg22968622	34.8851	3.95e-39	17	44353343	Imputed	A	0.134614	17	43663579		Intergenic
rs146009226	cg22968622	34.8851	3.95e-39	17	44353344	Imputed	A	0.134614	17	43663579		Intergenic
rs113897852	cg22968622	34.8822	3.97e-39	17	44353318	Imputed	A	0.135155	17	43663579		Intergenic
rs117970858	cg22968622	34.8811	3.98e-39	17	44199029	Imputed	C	0.135281	17	43663579		Intergenic
chr17:44254686:I	cg22968622	34.8761	4.03e-39	17	44254686	Imputed	TAATGCACAGGAAAA	0.129378	17	43663579		Intergenic
rs111245553	cg22968622	34.8719	4.06e-39	17	44343121	Imputed	G	0.129399	17	43663579		Intergenic
rs111418565	cg22968622	34.8719	4.06e-39	17	44343392	Imputed	A	0.129399	17	43663579		Intergenic
rs111495978	cg22968622	34.8719	4.06e-39	17	44343084	Imputed	G	0.129399	17	43663579		Intergenic
rs112380767	cg22968622	34.8719	4.06e-39	17	44344222	Imputed	G	0.129399	17	43663579		Intergenic
rs112451887	cg22968622	34.8719	4.06e-39	17	44344219	Imputed	T	0.129399	17	43663579		Intergenic
chr17:44342738:I	cg22968622	34.8673	4.11e-39	17	44342738	Imputed	CCTT	0.134535	17	43663579		Intergenic
rs113313878	cg22968622	34.8475	4.29e-39	17	44356637	Imputed	T	0.134545	17	43663579		Intergenic
rs145311172	cg22968622	34.847	4.29e-39	17	44318665	Imputed	C	0.12678	17	43663579		Intergenic
rs2696673	cg22968622	34.847	4.29e-39	17	44315803	Imputed	C	0.126778	17	43663579		Intergenic
rs113164110	cg22968622	34.8365	4.39e-39	17	44355162	Imputed	G	0.134843	17	43663579		Intergenic
rs117921001	cg22968622	34.8305	4.45e-39	17	44232408	Imputed	A	0.134725	17	43663579		Intergenic
chr17:44172493:I	cg22968622	34.8209	4.54e-39	17	44172493	Imputed	AT	0.134737	17	43663579		Intergenic
chr17:44251491:D	cg22968622	34.8153	4.6e-39	17	44251491	Imputed	G	0.134535	17	43663579		Intergenic
rs112465334	cg22968622	34.8151	4.6e-39	17	44260933	Imputed	G	0.1334	17	43663579		Intergenic
rs117369310	cg22968622	34.8147	4.61e-39	17	44232169	Imputed	G	0.13473	17	43663579		Intergenic
rs117589461	cg22968622	34.8142	4.61e-39	17	44243868	Imputed	T	0.133428	17	43663579		Intergenic
rs117738656	cg22968622	34.8147	4.61e-39	17	44233699	Imputed	T	0.13473	17	43663579		Intergenic
rs117859764	cg22968622	34.8142	4.61e-39	17	44243870	Imputed	C	0.133428	17	43663579		Intergenic
rs117937465	cg22968622	34.8142	4.61e-39	17	44243863	Imputed	T	0.133428	17	43663579		Intergenic
rs118179451	cg22968622	34.8147	4.61e-39	17	44232990	Imputed	C	0.13473	17	43663579		Intergenic
rs117200899	cg22968622	34.8132	4.62e-39	17	44241797	Imputed	C	0.13341	17	43663579		Intergenic
rs116886171	cg22968622	34.8091	4.66e-39	17	44250883	Imputed	A	0.134764	17	43663579		Intergenic
rs117830489	cg22968622	34.8096	4.66e-39	17	44223491	Imputed	G	0.134708	17	43663579		Intergenic
rs117629202	cg22968622	34.8064	4.69e-39	17	44344596	Imputed	A	0.134764	17	43663579		Intergenic
rs117995241	cg22968622	34.8064	4.69e-39	17	44344595	Imputed	T	0.134764	17	43663579		Intergenic
rs113313410	cg22968622	34.8041	4.71e-39	17	44238490	Imputed	A	0.133882	17	43663579		Intergenic
rs149477634	cg22968622	34.8045	4.71e-39	17	44257974	Imputed	A	0.13477	17	43663579		Intergenic
chr17:44170129:I	cg22968622	34.8024	4.73e-39	17	44170129	Imputed	CAA	0.134781	17	43663579		Intergenic
chr17:44275658:D	cg22968622	34.8024	4.73e-39	17	44275658	Imputed	T	0.134781	17	43663579		Intergenic
rs112596352	cg22968622	34.8024	4.73e-39	17	44170238	Imputed	A	0.134781	17	43663579		Intergenic
rs113667975	cg22968622	34.8024	4.73e-39	17	44170018	Imputed	C	0.134781	17	43663579		Intergenic
chr17:44352633:D	cg22968622	34.8018	4.74e-39	17	44352633	Imputed	G	0.134985	17	43663579		Intergenic
chr17:44359782:D	cg22968622	34.8016	4.74e-39	17	44359782	Imputed	T	0.135393	17	43663579		Intergenic
rs117251379	cg22968622	34.8018	4.74e-39	17	44352621	Imputed	G	0.134985	17	43663579		Intergenic
rs117542455	cg22968622	34.8018	4.74e-39	17	44352639	Imputed	A	0.134985	17	43663579		Intergenic
rs141241039	cg22968622	34.8018	4.74e-39	17	44353414	Imputed	G	0.134985	17	43663579		Intergenic
rs112015408	cg22968622	34.8001	4.75e-39	17	44220790	Imputed	G	0.134831	17	43663579		Intergenic
rs112595714	cg22968622	34.8001	4.75e-39	17	44220785	Imputed	A	0.134831	17	43663579		Intergenic
rs141341386	cg22968622	34.8002	4.75e-39	17	44305252	Imputed	A	0.135051	17	43663579		Intergenic
rs186217479	cg22968622	34.8001	4.75e-39	17	44344300	Imputed	T	0.134904	17	43663579		Intergenic
chr17:44316878:D	cg22968622	34.7979	4.78e-39	17	44316878	Imputed	C	0.135101	17	43663579		Intergenic
rs116868854	cg22968622	34.7979	4.78e-39	17	44288702	Imputed	T	0.134787	17	43663579		Intergenic
rs113146341	cg22968622	34.7968	4.79e-39	17	44296097	Imputed	T	0.134792	17	43663579		Intergenic
rs117114757	cg22968622	34.7968	4.79e-39	17	44172391	Imputed	T	0.134792	17	43663579		Intergenic
rs117962469	cg22968622	34.7968	4.79e-39	17	44172698	Imputed	C	0.134792	17	43663579		Intergenic
rs118105789	cg22968622	34.7968	4.79e-39	17	44172408	Imputed	G	0.134792	17	43663579		Intergenic
rs117023470	cg22968622	34.7957	4.8e-39	17	44268697	Imputed	C	0.134775	17	43663579		Intergenic
chr17:44243351:I	cg22968622	34.7937	4.82e-39	17	44243351	Imputed	TCG	0.133254	17	43663579		Intergenic
chr17:44243354:I	cg22968622	34.7937	4.82e-39	17	44243354	Imputed	AG	0.133254	17	43663579		Intergenic
rs116934879	cg22968622	34.7916	4.84e-39	17	44357885	Imputed	G	0.133618	17	43663579		Intergenic
rs144688527	cg22968622	34.7903	4.86e-39	17	44367296	Imputed	A	0.133316	17	43663579		Intergenic
rs141388053	cg22968622	34.7893	4.87e-39	17	44295052	Imputed	C	0.134792	17	43663579		Intergenic
chr17:44354157:I	cg22968622	34.7869	4.89e-39	17	44354157	Imputed	TTTTC	0.134742	17	43663579		Intergenic
rs112839636	cg22968622	34.7873	4.89e-39	17	44353320	Imputed	A	0.134733	17	43663579		Intergenic
rs112994126	cg22968622	34.7869	4.89e-39	17	44353505	Imputed	T	0.134742	17	43663579		Intergenic
rs117272799	cg22968622	34.7876	4.89e-39	17	44352970	Imputed	A	0.134737	17	43663579		Intergenic
rs117439726	cg22968622	34.7873	4.89e-39	17	44353206	Imputed	C	0.134733	17	43663579		Intergenic
rs117656372	cg22968622	34.7875	4.89e-39	17	44255550	Imputed	G	0.134781	17	43663579		Intergenic
rs117661326	cg22968622	34.7874	4.89e-39	17	44269217	Imputed	C	0.134792	17	43663579		Intergenic
rs117689497	cg22968622	34.7873	4.89e-39	17	44353114	Imputed	C	0.134733	17	43663579		Intergenic
rs117934638	cg22968622	34.7873	4.89e-39	17	44353175	Imputed	C	0.134733	17	43663579		Intergenic
rs118092567	cg22968622	34.7875	4.89e-39	17	44259261	Imputed	G	0.134781	17	43663579		Intergenic
chr17:44251554:D	cg22968622	34.7865	4.9e-39	17	44251554	Imputed	A	0.135202	17	43663579		Intergenic
rs117844046	cg22968622	34.7865	4.9e-39	17	44246143	Imputed	A	0.133895	17	43663579		Intergenic
rs118048278	cg22968622	34.7865	4.9e-39	17	44287373	Imputed	C	0.134787	17	43663579		Intergenic
rs137967143	cg22968622	34.7855	4.91e-39	17	44257923	Imputed	A	0.134792	17	43663579		Intergenic
rs117359018	cg22968622	34.7845	4.92e-39	17	44266975	Imputed	A	0.134798	17	43663579		Intergenic
rs117967689	cg22968622	34.7845	4.92e-39	17	44293546	Imputed	T	0.134798	17	43663579		Intergenic
rs117991446	cg22968622	34.7845	4.92e-39	17	44263955	Imputed	G	0.134798	17	43663579		Intergenic
rs140563304	cg22968622	34.7845	4.92e-39	17	44293939	Imputed	G	0.134798	17	43663579		Intergenic
chr17:44179168:D	cg22968622	34.7835	4.93e-39	17	44179168	Imputed	A	0.134803	17	43663579		Intergenic
chr17:44203855:I	cg22968622	34.7835	4.93e-39	17	44203855	Imputed	CTCAA	0.134803	17	43663579		Intergenic
rs112073200	cg22968622	34.7835	4.93e-39	17	44201791	Imputed	C	0.134803	17	43663579		Intergenic
rs117031805	cg22968622	34.7836	4.93e-39	17	44352872	Imputed	G	0.135076	17	43663579		Intergenic
rs117412588	cg22968622	34.7835	4.93e-39	17	44184404	Imputed	A	0.134803	17	43663579		Intergenic
rs117793672	cg22968622	34.7835	4.93e-39	17	44302904	Imputed	C	0.134803	17	43663579		Intergenic
rs118131570	cg22968622	34.7835	4.93e-39	17	44207523	Imputed	A	0.134803	17	43663579		Intergenic
rs148992948	cg22968622	34.7835	4.93e-39	17	44304910	Imputed	C	0.134803	17	43663579		Intergenic
rs185676110	cg22968622	34.7834	4.93e-39	17	44350293	Imputed	G	0.134792	17	43663579		Intergenic
rs117244259	cg22968622	34.7824	4.94e-39	17	44207360	Imputed	T	0.134809	17	43663579		Intergenic
rs117615351	cg22968622	34.782	4.95e-39	17	44244397	Imputed	A	0.135017	17	43663579		Intergenic
rs117917171	cg22968622	34.7806	4.96e-39	17	44228619	Imputed	T	0.133208	17	43663579		Intergenic
rs117199708	cg22968622	34.7791	4.98e-39	17	44346393	Imputed	G	0.13482	17	43663579		Intergenic
rs146483635	cg22968622	34.7793	4.98e-39	17	44281633	Imputed	A	0.133483	17	43663579		Intergenic
rs112165529	cg22968622	34.7763	5.01e-39	17	44356770	Imputed	A	0.134624	17	43663579		Intergenic
rs117034045	cg22968622	34.7765	5.01e-39	17	44256710	Imputed	C	0.134798	17	43663579		Intergenic
rs117588694	cg22968622	34.7754	5.02e-39	17	44254467	Imputed	G	0.13458	17	43663579		Intergenic
rs111905143	cg22968622	34.7741	5.03e-39	17	44184808	Imputed	G	0.133978	17	43663579		Intergenic
chr17:44220863:D	cg22968622	34.7738	5.04e-39	17	44220863	Imputed	A	0.134871	17	43663579		Intergenic
rs111797115	cg22968622	34.7738	5.04e-39	17	44220942	Imputed	A	0.134871	17	43663579		Intergenic
rs117122375	cg22968622	34.7738	5.04e-39	17	44220454	Imputed	G	0.134871	17	43663579		Intergenic
rs117163782	cg22968622	34.7734	5.04e-39	17	44269421	Imputed	T	0.134548	17	43663579		Intergenic
rs111633472	cg22968622	34.7725	5.05e-39	17	44169605	Imputed	C	0.13482	17	43663579		Intergenic
rs111944040	cg22968622	34.7725	5.05e-39	17	44296179	Imputed	C	0.13482	17	43663579		Intergenic
rs111970616	cg22968622	34.7725	5.05e-39	17	44169581	Imputed	C	0.13482	17	43663579		Intergenic
rs113043104	cg22968622	34.7725	5.05e-39	17	44169406	Imputed	A	0.13482	17	43663579		Intergenic
rs117003423	cg22968622	34.7725	5.05e-39	17	44236209	Imputed	A	0.133433	17	43663579		Intergenic
rs117162421	cg22968622	34.7725	5.05e-39	17	44169437	Imputed	C	0.13482	17	43663579		Intergenic
rs117295539	cg22968622	34.7725	5.05e-39	17	44169759	Imputed	A	0.13482	17	43663579		Intergenic
rs117528810	cg22968622	34.7725	5.05e-39	17	44273919	Imputed	G	0.134551	17	43663579		Intergenic
rs117585479	cg22968622	34.7725	5.05e-39	17	44195495	Imputed	A	0.13482	17	43663579		Intergenic
rs118064448	cg22968622	34.7725	5.05e-39	17	44168508	Imputed	T	0.13482	17	43663579		Intergenic
rs118132091	cg22968622	34.7725	5.05e-39	17	44169769	Imputed	T	0.13482	17	43663579		Intergenic
rs117658398	cg22968622	34.7712	5.06e-39	17	44348013	Imputed	G	0.134831	17	43663579		Intergenic
rs144215416	cg22968622	34.7712	5.06e-39	17	44346674	Imputed	C	0.134899	17	43663579		Intergenic
rs113579491	cg22968622	34.7708	5.07e-39	17	44344456	Imputed	C	0.135073	17	43663579		Intergenic
rs116862913	cg22968622	34.771	5.07e-39	17	44224980	Imputed	C	0.134753	17	43663579		Intergenic
rs117151489	cg22968622	34.7707	5.07e-39	17	44167729	Imputed	G	0.134569	17	43663579		Intergenic
rs117334964	cg22968622	34.7703	5.07e-39	17	44217791	Imputed	C	0.134758	17	43663579		Intergenic
rs117346514	cg22968622	34.771	5.07e-39	17	44219888	Imputed	T	0.134753	17	43663579		Intergenic
rs117421119	cg22968622	34.771	5.07e-39	17	44223034	Imputed	C	0.134753	17	43663579		Intergenic
rs117467521	cg22968622	34.7707	5.07e-39	17	44167464	Imputed	A	0.134569	17	43663579		Intergenic
rs117709001	cg22968622	34.7702	5.07e-39	17	44228609	Imputed	G	0.134843	17	43663579		Intergenic
rs117711747	cg22968622	34.771	5.07e-39	17	44225440	Imputed	C	0.134754	17	43663579		Intergenic
rs117812918	cg22968622	34.7707	5.07e-39	17	44167101	Imputed	C	0.134569	17	43663579		Intergenic
rs118186261	cg22968622	34.7707	5.07e-39	17	44167661	Imputed	T	0.134569	17	43663579		Intergenic
rs116961004	cg22968622	34.7689	5.09e-39	17	44230647	Imputed	T	0.13486	17	43663579		Intergenic
rs118127683	cg22968622	34.7684	5.09e-39	17	44209985	Imputed	C	0.13482	17	43663579		Intergenic
rs116875997	cg22968622	34.7682	5.1e-39	17	44221836	Imputed	T	0.134775	17	43663579		Intergenic
rs117337684	cg22968622	34.7682	5.1e-39	17	44225886	Imputed	A	0.134775	17	43663579		Intergenic
rs117563597	cg22968622	34.7678	5.1e-39	17	44253951	Imputed	A	0.125152	17	43663579		Intergenic
rs117566287	cg22968622	34.7682	5.1e-39	17	44222019	Imputed	T	0.134775	17	43663579		Intergenic
rs117738914	cg22968622	34.7682	5.1e-39	17	44219905	Imputed	A	0.134775	17	43663579		Intergenic
rs117797582	cg22968622	34.7682	5.1e-39	17	44288284	Imputed	A	0.133249	17	43663579		Intergenic
chr17:44224569:D	cg22968622	34.7674	5.11e-39	17	44224569	Imputed	C	0.134781	17	43663579		Intergenic
rs113417185	cg22968622	34.7674	5.11e-39	17	44228265	Imputed	C	0.134781	17	43663579		Intergenic
rs117355999	cg22968622	34.7666	5.11e-39	17	44239639	Imputed	A	0.134787	17	43663579		Intergenic
rs117381130	cg22968622	34.7666	5.11e-39	17	44228621	Imputed	A	0.134787	17	43663579		Intergenic
rs117439954	cg22968622	34.7666	5.11e-39	17	44246330	Imputed	C	0.134787	17	43663579		Intergenic
rs117581248	cg22968622	34.7674	5.11e-39	17	44224782	Imputed	T	0.134781	17	43663579		Intergenic
rs117617520	cg22968622	34.7666	5.11e-39	17	44239225	Imputed	A	0.134787	17	43663579		Intergenic
rs138137490	cg22968622	34.7658	5.12e-39	17	44248837	Imputed	C	0.134792	17	43663579		Intergenic
rs138251639	cg22968622	34.7659	5.12e-39	17	44356320	Imputed	T	0.134687	17	43663579		Intergenic
chr17:44229708:D	cg22968622	34.7649	5.13e-39	17	44229708	Imputed	G	0.134799	17	43663579		Intergenic
rs116956796	cg22968622	34.765	5.13e-39	17	44173356	Imputed	G	0.134612	17	43663579		Intergenic
rs117173681	cg22968622	34.7649	5.13e-39	17	44229364	Imputed	C	0.134799	17	43663579		Intergenic
rs117344850	cg22968622	34.765	5.13e-39	17	44173179	Imputed	A	0.134612	17	43663579		Intergenic
rs117744619	cg22968622	34.7649	5.13e-39	17	44245359	Imputed	A	0.134798	17	43663579		Intergenic
rs114144298	cg22968622	34.7642	5.14e-39	17	44250108	Imputed	C	0.134966	17	43663579		Intergenic
rs117198771	cg22968622	34.7641	5.14e-39	17	44246527	Imputed	C	0.134803	17	43663579		Intergenic
rs117536891	cg22968622	34.7641	5.14e-39	17	44230097	Imputed	T	0.134803	17	43663579		Intergenic
rs117757293	cg22968622	34.7641	5.14e-39	17	44231827	Imputed	C	0.134803	17	43663579		Intergenic
rs117830374	cg22968622	34.7641	5.14e-39	17	44249199	Imputed	G	0.134803	17	43663579		Intergenic
rs118028663	cg22968622	34.7641	5.14e-39	17	44249096	Imputed	C	0.134803	17	43663579		Intergenic
rs111702312	cg22968622	34.7632	5.15e-39	17	44355343	Imputed	C	0.134917	17	43663579		Intergenic
rs112082260	cg22968622	34.7632	5.15e-39	17	44355303	Imputed	C	0.134917	17	43663579		Intergenic
rs117610502	cg22968622	34.7632	5.15e-39	17	44255784	Imputed	G	0.134809	17	43663579		Intergenic
rs117650190	cg22968622	34.7631	5.15e-39	17	44259792	Imputed	A	0.134837	17	43663579		Intergenic
rs118190055	cg22968622	34.7639	5.15e-39	17	44254291	Imputed	T	0.131537	17	43663579		Intergenic
rs147820602	cg22968622	34.7632	5.15e-39	17	44274933	Imputed	G	0.134809	17	43663579		Intergenic
chr17:44287709:I	cg22968622	34.7622	5.16e-39	17	44287709	Imputed	AG	0.134815	17	43663579		Intergenic
rs116983424	cg22968622	34.7625	5.16e-39	17	44240850	Imputed	C	0.133472	17	43663579		Intergenic
rs117149447	cg22968622	34.7622	5.16e-39	17	44269922	Imputed	C	0.134815	17	43663579		Intergenic
rs117297660	cg22968622	34.7622	5.16e-39	17	44273889	Imputed	T	0.134815	17	43663579		Intergenic
rs117484297	cg22968622	34.7622	5.16e-39	17	44288281	Imputed	T	0.134815	17	43663579		Intergenic
rs117607304	cg22968622	34.7622	5.16e-39	17	44266692	Imputed	A	0.134815	17	43663579		Intergenic
rs117739649	cg22968622	34.7629	5.16e-39	17	44235893	Imputed	T	0.133485	17	43663579		Intergenic
rs141911350	cg22968622	34.7622	5.16e-39	17	44287006	Imputed	G	0.134815	17	43663579		Intergenic
rs76178664	cg22968622	34.7622	5.16e-39	17	44266364	Imputed	G	0.134815	17	43663579		Intergenic
rs117190688	cg22968622	34.7618	5.17e-39	17	44240497	Imputed	C	0.133466	17	43663579		Intergenic
rs117299592	cg22968622	34.7618	5.17e-39	17	44244639	Imputed	G	0.133466	17	43663579		Intergenic
rs117601640	cg22968622	34.7618	5.17e-39	17	44240797	Imputed	C	0.133466	17	43663579		Intergenic
rs118019216	cg22968622	34.7615	5.17e-39	17	44200510	Imputed	A	0.134871	17	43663579		Intergenic
chr17:44280598:D	cg22968622	34.7613	5.18e-39	17	44280598	Imputed	T	0.13482	17	43663579		Intergenic
rs117210862	cg22968622	34.7613	5.18e-39	17	44250473	Imputed	C	0.13482	17	43663579		Intergenic
rs117295299	cg22968622	34.761	5.18e-39	17	44351929	Imputed	G	0.134843	17	43663579		Intergenic
rs117796296	cg22968622	34.7613	5.18e-39	17	44276479	Imputed	G	0.13482	17	43663579		Intergenic
rs117832263	cg22968622	34.7613	5.18e-39	17	44164323	Imputed	A	0.134822	17	43663579		Intergenic
rs117877895	cg22968622	34.7613	5.18e-39	17	44285683	Imputed	C	0.13482	17	43663579		Intergenic
rs117980624	cg22968622	34.7613	5.18e-39	17	44217226	Imputed	G	0.13482	17	43663579		Intergenic
rs118098769	cg22968622	34.761	5.18e-39	17	44250616	Imputed	A	0.134865	17	43663579		Intergenic
rs138074626	cg22968622	34.7605	5.18e-39	17	44359499	Imputed	T	0.135433	17	43663579		Intergenic
rs141697873	cg22968622	34.7612	5.18e-39	17	44310101	Imputed	G	0.134865	17	43663579		Intergenic
rs75741127	cg22968622	34.7613	5.18e-39	17	44285436	Imputed	T	0.13482	17	43663579		Intergenic
rs116866893	cg22968622	34.7603	5.19e-39	17	44263923	Imputed	C	0.134826	17	43663579		Intergenic
rs117818149	cg22968622	34.7601	5.19e-39	17	44351686	Imputed	T	0.134837	17	43663579		Intergenic
rs142652359	cg22968622	34.7597	5.19e-39	17	44362865	Imputed	C	0.135444	17	43663579		Intergenic
rs145803931	cg22968622	34.7603	5.19e-39	17	44212032	Imputed	A	0.134826	17	43663579		Intergenic
rs148081288	cg22968622	34.7603	5.19e-39	17	44286972	Imputed	C	0.134826	17	43663579		Intergenic
rs74461106	cg22968622	34.7601	5.19e-39	17	44361075	Imputed	G	0.135438	17	43663579		Intergenic
chr17:44172205:D	cg22968622	34.7592	5.2e-39	17	44172205	Imputed	C	0.134831	17	43663579		Intergenic
chr17:44185427:I	cg22968622	34.7592	5.2e-39	17	44185427	Imputed	AT	0.134831	17	43663579		Intergenic
chr17:44195611:D	cg22968622	34.7592	5.2e-39	17	44195611	Imputed	C	0.134831	17	43663579		Intergenic
chr17:44197417:I	cg22968622	34.7592	5.2e-39	17	44197417	Imputed	TGAA	0.134831	17	43663579		Intergenic
chr17:44197775:I	cg22968622	34.7592	5.2e-39	17	44197775	Imputed	GCA	0.134831	17	43663579		Intergenic
chr17:44198962:I	cg22968622	34.7592	5.2e-39	17	44198962	Imputed	TA	0.134831	17	43663579		Intergenic
chr17:44204299:D	cg22968622	34.7592	5.2e-39	17	44204299	Imputed	A	0.134831	17	43663579		Intergenic
chr17:44212521:I	cg22968622	34.7592	5.2e-39	17	44212521	Imputed	TG	0.134831	17	43663579		Intergenic
chr17:44215416:I	cg22968622	34.7592	5.2e-39	17	44215416	Imputed	AG	0.134831	17	43663579		Intergenic
chr17:44216966:I	cg22968622	34.7592	5.2e-39	17	44216966	Imputed	GC	0.134831	17	43663579		Intergenic
chr17:44225955:I	cg22968622	34.7587	5.2e-39	17	44225955	Imputed	CCTT	0.134545	17	43663579		Intergenic
chr17:44238130:D	cg22968622	34.7592	5.2e-39	17	44238130	Imputed	A	0.134831	17	43663579		Intergenic
chr17:44250669:D	cg22968622	34.7592	5.2e-39	17	44250669	Imputed	T	0.134831	17	43663579		Intergenic
chr17:44254993:D	cg22968622	34.7592	5.2e-39	17	44254993	Imputed	G	0.134831	17	43663579		Intergenic
chr17:44261613:I	cg22968622	34.7592	5.2e-39	17	44261613	Imputed	TCC	0.134831	17	43663579		Intergenic
chr17:44276431:I	cg22968622	34.7592	5.2e-39	17	44276431	Imputed	TAGAA	0.134831	17	43663579		Intergenic
chr17:44279371:D	cg22968622	34.7592	5.2e-39	17	44279371	Imputed	T	0.134831	17	43663579		Intergenic
chr17:44279557:D	cg22968622	34.7592	5.2e-39	17	44279557	Imputed	T	0.134831	17	43663579		Intergenic
chr17:44285460:I	cg22968622	34.7592	5.2e-39	17	44285460	Imputed	GA	0.134831	17	43663579		Intergenic
chr17:44288114:D	cg22968622	34.7592	5.2e-39	17	44288114	Imputed	T	0.134831	17	43663579		Intergenic
chr17:44338593:D	cg22968622	34.7592	5.2e-39	17	44338593	Imputed	A	0.134831	17	43663579		Intergenic
chr17:44348963:D	cg22968622	34.7591	5.2e-39	17	44348963	Imputed	T	0.13482	17	43663579		Intergenic
chr17:44349761:I	cg22968622	34.7591	5.2e-39	17	44349761	Imputed	AT	0.13482	17	43663579		Intergenic
chr17:44349787:D	cg22968622	34.7591	5.2e-39	17	44349787	Imputed	T	0.13482	17	43663579		Intergenic
rs111337375	cg22968622	34.7592	5.2e-39	17	44277818	Imputed	G	0.134831	17	43663579		Intergenic
rs111369188	cg22968622	34.7592	5.2e-39	17	44266531	Imputed	A	0.134831	17	43663579		Intergenic
rs111398090	cg22968622	34.7592	5.2e-39	17	44192957	Imputed	C	0.134831	17	43663579		Intergenic
rs111449057	cg22968622	34.7592	5.2e-39	17	44289232	Imputed	T	0.134831	17	43663579		Intergenic
rs111507114	cg22968622	34.7592	5.2e-39	17	44279252	Imputed	G	0.134831	17	43663579		Intergenic
rs111541342	cg22968622	34.7592	5.2e-39	17	44251548	Imputed	A	0.134831	17	43663579		Intergenic
rs111854089	cg22968622	34.7592	5.2e-39	17	44344541	Imputed	A	0.134831	17	43663579		Intergenic
rs111927953	cg22968622	34.7592	5.2e-39	17	44288640	Imputed	G	0.134831	17	43663579		Intergenic
rs111944356	cg22968622	34.7592	5.2e-39	17	44289150	Imputed	C	0.134831	17	43663579		Intergenic
rs111969097	cg22968622	34.7592	5.2e-39	17	44200015	Imputed	C	0.134831	17	43663579		Intergenic
rs112088005	cg22968622	34.7592	5.2e-39	17	44289220	Imputed	T	0.134831	17	43663579		Intergenic
rs112120926	cg22968622	34.7591	5.2e-39	17	44351578	Imputed	C	0.13482	17	43663579		Intergenic
rs112126591	cg22968622	34.7592	5.2e-39	17	44251582	Imputed	C	0.134831	17	43663579		Intergenic
rs112142358	cg22968622	34.7592	5.2e-39	17	44261137	Imputed	T	0.134831	17	43663579		Intergenic
rs112327670	cg22968622	34.7592	5.2e-39	17	44202231	Imputed	G	0.134831	17	43663579		Intergenic
rs112523136	cg22968622	34.7591	5.2e-39	17	44348387	Imputed	G	0.13482	17	43663579		Intergenic
rs112560196	cg22968622	34.7592	5.2e-39	17	44200078	Imputed	T	0.134831	17	43663579		Intergenic
rs112593050	cg22968622	34.7591	5.2e-39	17	44348298	Imputed	G	0.13482	17	43663579		Intergenic
rs112861504	cg22968622	34.7591	5.2e-39	17	44348356	Imputed	A	0.13482	17	43663579		Intergenic
rs112892892	cg22968622	34.759	5.2e-39	17	44338503	Imputed	A	0.134843	17	43663579		Intergenic
rs112899435	cg22968622	34.7592	5.2e-39	17	44221042	Imputed	T	0.134831	17	43663579		Intergenic
rs112907155	cg22968622	34.7592	5.2e-39	17	44200033	Imputed	C	0.134831	17	43663579		Intergenic
rs112934982	cg22968622	34.7592	5.2e-39	17	44345286	Imputed	G	0.134831	17	43663579		Intergenic
rs113065530	cg22968622	34.7592	5.2e-39	17	44266342	Imputed	C	0.134831	17	43663579		Intergenic
rs113226080	cg22968622	34.7592	5.2e-39	17	44266290	Imputed	C	0.134831	17	43663579		Intergenic
rs113234183	cg22968622	34.7592	5.2e-39	17	44266227	Imputed	C	0.134831	17	43663579		Intergenic
rs113493003	cg22968622	34.7592	5.2e-39	17	44345114	Imputed	T	0.134831	17	43663579		Intergenic
rs113634064	cg22968622	34.7592	5.2e-39	17	44275619	Imputed	G	0.134831	17	43663579		Intergenic
rs113699705	cg22968622	34.7592	5.2e-39	17	44277825	Imputed	T	0.134831	17	43663579		Intergenic
rs113798705	cg22968622	34.7591	5.2e-39	17	44351452	Imputed	C	0.13482	17	43663579		Intergenic
rs113830390	cg22968622	34.7592	5.2e-39	17	44344552	Imputed	T	0.134831	17	43663579		Intergenic
rs113915912	cg22968622	34.7592	5.2e-39	17	44196653	Imputed	A	0.134831	17	43663579		Intergenic
rs113941543	cg22968622	34.7592	5.2e-39	17	44184375	Imputed	G	0.134831	17	43663579		Intergenic
rs113988658	cg22968622	34.7591	5.2e-39	17	44351731	Imputed	G	0.13482	17	43663579		Intergenic
rs114393584	cg22968622	34.7592	5.2e-39	17	44273448	Imputed	A	0.134831	17	43663579		Intergenic
rs115509702	cg22968622	34.7592	5.2e-39	17	44219831	Imputed	A	0.134831	17	43663579		Intergenic
rs115855724	cg22968622	34.7592	5.2e-39	17	44246405	Imputed	A	0.134831	17	43663579		Intergenic
rs116804473	cg22968622	34.7592	5.2e-39	17	44197603	Imputed	C	0.134831	17	43663579		Intergenic
rs116841091	cg22968622	34.7592	5.2e-39	17	44165852	Imputed	G	0.134831	17	43663579		Intergenic
rs116858919	cg22968622	34.7592	5.2e-39	17	44231326	Imputed	A	0.134831	17	43663579		Intergenic
rs116861544	cg22968622	34.7592	5.2e-39	17	44238938	Imputed	C	0.134831	17	43663579		Intergenic
rs116862736	cg22968622	34.7592	5.2e-39	17	44202952	Imputed	G	0.134831	17	43663579		Intergenic
rs116864963	cg22968622	34.7592	5.2e-39	17	44213934	Imputed	A	0.134831	17	43663579		Intergenic
rs116870545	cg22968622	34.7592	5.2e-39	17	44269726	Imputed	A	0.134831	17	43663579		Intergenic
rs116875990	cg22968622	34.7592	5.2e-39	17	44196153	Imputed	G	0.134831	17	43663579		Intergenic
rs116876224	cg22968622	34.7592	5.2e-39	17	44246997	Imputed	A	0.134831	17	43663579		Intergenic
rs116894817	cg22968622	34.7592	5.2e-39	17	44270059	Imputed	T	0.134831	17	43663579		Intergenic
rs116907076	cg22968622	34.7592	5.2e-39	17	44240107	Imputed	C	0.134831	17	43663579		Intergenic
rs116909189	cg22968622	34.7592	5.2e-39	17	44247314	Imputed	T	0.134831	17	43663579		Intergenic
rs116909846	cg22968622	34.7592	5.2e-39	17	44267164	Imputed	T	0.134831	17	43663579		Intergenic
rs116950219	cg22968622	34.7592	5.2e-39	17	44213204	Imputed	T	0.134831	17	43663579		Intergenic
rs116964613	cg22968622	34.7592	5.2e-39	17	44217112	Imputed	T	0.134831	17	43663579		Intergenic
rs116966126	cg22968622	34.7592	5.2e-39	17	44222067	Imputed	G	0.134831	17	43663579		Intergenic
rs116968497	cg22968622	34.7592	5.2e-39	17	44207066	Imputed	G	0.134831	17	43663579		Intergenic
rs116969861	cg22968622	34.7592	5.2e-39	17	44287310	Imputed	G	0.134831	17	43663579		Intergenic
rs116972200	cg22968622	34.7591	5.2e-39	17	44351007	Imputed	C	0.13482	17	43663579		Intergenic
rs116978232	cg22968622	34.7592	5.2e-39	17	44292126	Imputed	C	0.134831	17	43663579		Intergenic
rs116983492	cg22968622	34.7592	5.2e-39	17	44225802	Imputed	T	0.134831	17	43663579		Intergenic
rs116984005	cg22968622	34.7591	5.2e-39	17	44348848	Imputed	A	0.13482	17	43663579		Intergenic
rs116984773	cg22968622	34.7592	5.2e-39	17	44210988	Imputed	G	0.134831	17	43663579		Intergenic
rs116993804	cg22968622	34.7592	5.2e-39	17	44194152	Imputed	A	0.134831	17	43663579		Intergenic
rs116995956	cg22968622	34.7592	5.2e-39	17	44174513	Imputed	A	0.134831	17	43663579		Intergenic
rs117009090	cg22968622	34.7592	5.2e-39	17	44194519	Imputed	C	0.134831	17	43663579		Intergenic
rs117011189	cg22968622	34.7592	5.2e-39	17	44225485	Imputed	C	0.134831	17	43663579		Intergenic
rs117013191	cg22968622	34.7592	5.2e-39	17	44210442	Imputed	T	0.134831	17	43663579		Intergenic
rs117013974	cg22968622	34.7592	5.2e-39	17	44201680	Imputed	C	0.134831	17	43663579		Intergenic
rs117019333	cg22968622	34.7592	5.2e-39	17	44166197	Imputed	G	0.134831	17	43663579		Intergenic
rs117028000	cg22968622	34.7592	5.2e-39	17	44289628	Imputed	C	0.134831	17	43663579		Intergenic
rs117028732	cg22968622	34.7592	5.2e-39	17	44222460	Imputed	G	0.134831	17	43663579		Intergenic
rs117029203	cg22968622	34.7592	5.2e-39	17	44203366	Imputed	C	0.134831	17	43663579		Intergenic
rs117030770	cg22968622	34.7592	5.2e-39	17	44186593	Imputed	C	0.134831	17	43663579		Intergenic
rs117033351	cg22968622	34.7592	5.2e-39	17	44344970	Imputed	C	0.134831	17	43663579		Intergenic
rs117033919	cg22968622	34.7592	5.2e-39	17	44248042	Imputed	A	0.134831	17	43663579		Intergenic
rs117035114	cg22968622	34.7592	5.2e-39	17	44264045	Imputed	C	0.134831	17	43663579		Intergenic
rs117037310	cg22968622	34.7592	5.2e-39	17	44278661	Imputed	A	0.134831	17	43663579		Intergenic
rs117054185	cg22968622	34.7592	5.2e-39	17	44274451	Imputed	C	0.134831	17	43663579		Intergenic
rs117057426	cg22968622	34.7592	5.2e-39	17	44196799	Imputed	A	0.134831	17	43663579		Intergenic
rs117057704	cg22968622	34.7592	5.2e-39	17	44244926	Imputed	G	0.134831	17	43663579		Intergenic
rs117060846	cg22968622	34.7592	5.2e-39	17	44179992	Imputed	G	0.134831	17	43663579		Intergenic
rs117066083	cg22968622	34.7592	5.2e-39	17	44279760	Imputed	A	0.134831	17	43663579		Intergenic
rs117072329	cg22968622	34.7592	5.2e-39	17	44264717	Imputed	C	0.134831	17	43663579		Intergenic
rs117074282	cg22968622	34.7592	5.2e-39	17	44346962	Imputed	T	0.134831	17	43663579		Intergenic
rs117078032	cg22968622	34.7592	5.2e-39	17	44233433	Imputed	C	0.134831	17	43663579		Intergenic
rs117086929	cg22968622	34.7592	5.2e-39	17	44204739	Imputed	C	0.134831	17	43663579		Intergenic
rs117088000	cg22968622	34.7592	5.2e-39	17	44228824	Imputed	G	0.134831	17	43663579		Intergenic
rs117090537	cg22968622	34.7592	5.2e-39	17	44291479	Imputed	A	0.134831	17	43663579		Intergenic
rs117093104	cg22968622	34.7592	5.2e-39	17	44171565	Imputed	A	0.134831	17	43663579		Intergenic
rs117099279	cg22968622	34.7592	5.2e-39	17	44280188	Imputed	A	0.134831	17	43663579		Intergenic
rs117103359	cg22968622	34.7592	5.2e-39	17	44347218	Imputed	A	0.134831	17	43663579		Intergenic
rs117106696	cg22968622	34.7592	5.2e-39	17	44348265	Imputed	C	0.134831	17	43663579		Intergenic
rs117111579	cg22968622	34.7592	5.2e-39	17	44227510	Imputed	T	0.134831	17	43663579		Intergenic
rs117117817	cg22968622	34.7592	5.2e-39	17	44233776	Imputed	C	0.134831	17	43663579		Intergenic
rs117124445	cg22968622	34.7592	5.2e-39	17	44205500	Imputed	G	0.134831	17	43663579		Intergenic
rs117139143	cg22968622	34.7592	5.2e-39	17	44177337	Imputed	T	0.134831	17	43663579		Intergenic
rs117159173	cg22968622	34.7591	5.2e-39	17	44350203	Imputed	G	0.13482	17	43663579		Intergenic
rs117163661	cg22968622	34.7592	5.2e-39	17	44201887	Imputed	T	0.134831	17	43663579		Intergenic
rs117170565	cg22968622	34.7592	5.2e-39	17	44246211	Imputed	G	0.134831	17	43663579		Intergenic
rs117172170	cg22968622	34.7592	5.2e-39	17	44209474	Imputed	T	0.134831	17	43663579		Intergenic
rs117172203	cg22968622	34.7592	5.2e-39	17	44261753	Imputed	C	0.134831	17	43663579		Intergenic
rs117176110	cg22968622	34.7592	5.2e-39	17	44318184	Imputed	G	0.134831	17	43663579		Intergenic
rs117181745	cg22968622	34.7592	5.2e-39	17	44196822	Imputed	A	0.134831	17	43663579		Intergenic
rs117184432	cg22968622	34.7592	5.2e-39	17	44180173	Imputed	G	0.134831	17	43663579		Intergenic
rs117187923	cg22968622	34.7592	5.2e-39	17	44191085	Imputed	A	0.134831	17	43663579		Intergenic
rs117189205	cg22968622	34.7592	5.2e-39	17	44263729	Imputed	G	0.134831	17	43663579		Intergenic
rs117190742	cg22968622	34.7592	5.2e-39	17	44277265	Imputed	C	0.134831	17	43663579		Intergenic
rs117191478	cg22968622	34.7592	5.2e-39	17	44164090	Imputed	C	0.134831	17	43663579		Intergenic
rs117191567	cg22968622	34.7592	5.2e-39	17	44198806	Imputed	C	0.134831	17	43663579		Intergenic
rs117202207	cg22968622	34.7592	5.2e-39	17	44216226	Imputed	G	0.134831	17	43663579		Intergenic
rs117202541	cg22968622	34.7592	5.2e-39	17	44276330	Imputed	C	0.134831	17	43663579		Intergenic
rs117208195	cg22968622	34.7592	5.2e-39	17	44271430	Imputed	G	0.134831	17	43663579		Intergenic
rs117217364	cg22968622	34.7592	5.2e-39	17	44182181	Imputed	C	0.134831	17	43663579		Intergenic
rs117220523	cg22968622	34.7592	5.2e-39	17	44258422	Imputed	T	0.134831	17	43663579		Intergenic
rs117225424	cg22968622	34.7592	5.2e-39	17	44227196	Imputed	C	0.134831	17	43663579		Intergenic
rs117225544	cg22968622	34.7592	5.2e-39	17	44288579	Imputed	C	0.134831	17	43663579		Intergenic
rs117235142	cg22968622	34.7591	5.2e-39	17	44350662	Imputed	C	0.13482	17	43663579		Intergenic
rs117244974	cg22968622	34.7592	5.2e-39	17	44231117	Imputed	C	0.134831	17	43663579		Intergenic
rs117245479	cg22968622	34.7592	5.2e-39	17	44344822	Imputed	A	0.134831	17	43663579		Intergenic
rs117262853	cg22968622	34.7592	5.2e-39	17	44267170	Imputed	T	0.134831	17	43663579		Intergenic
rs117264941	cg22968622	34.7592	5.2e-39	17	44255777	Imputed	A	0.134831	17	43663579		Intergenic
rs117266776	cg22968622	34.7592	5.2e-39	17	44243979	Imputed	T	0.134831	17	43663579		Intergenic
rs117271347	cg22968622	34.7592	5.2e-39	17	44214094	Imputed	G	0.134831	17	43663579		Intergenic
rs117275282	cg22968622	34.7592	5.2e-39	17	44290047	Imputed	A	0.134831	17	43663579		Intergenic
rs117283235	cg22968622	34.7592	5.2e-39	17	44222335	Imputed	A	0.134831	17	43663579		Intergenic
rs117297395	cg22968622	34.7592	5.2e-39	17	44348593	Imputed	G	0.134831	17	43663579		Intergenic
rs117300072	cg22968622	34.7592	5.2e-39	17	44173408	Imputed	A	0.134831	17	43663579		Intergenic
rs117305492	cg22968622	34.7591	5.2e-39	17	44349347	Imputed	G	0.13482	17	43663579		Intergenic
rs117309232	cg22968622	34.7592	5.2e-39	17	44298102	Imputed	A	0.134831	17	43663579		Intergenic
rs117317034	cg22968622	34.7592	5.2e-39	17	44346610	Imputed	G	0.134831	17	43663579		Intergenic
rs117320809	cg22968622	34.7592	5.2e-39	17	44223387	Imputed	C	0.134831	17	43663579		Intergenic
rs117325185	cg22968622	34.7592	5.2e-39	17	44209628	Imputed	C	0.134831	17	43663579		Intergenic
rs117327659	cg22968622	34.7592	5.2e-39	17	44196015	Imputed	G	0.134831	17	43663579		Intergenic
rs117334825	cg22968622	34.7592	5.2e-39	17	44204749	Imputed	G	0.134831	17	43663579		Intergenic
rs117335450	cg22968622	34.7592	5.2e-39	17	44193097	Imputed	A	0.134831	17	43663579		Intergenic
rs117335771	cg22968622	34.7592	5.2e-39	17	44238966	Imputed	C	0.134831	17	43663579		Intergenic
rs117335890	cg22968622	34.7592	5.2e-39	17	44203131	Imputed	G	0.134831	17	43663579		Intergenic
rs117337393	cg22968622	34.7592	5.2e-39	17	44186301	Imputed	C	0.134831	17	43663579		Intergenic
rs117344299	cg22968622	34.7592	5.2e-39	17	44209957	Imputed	G	0.134831	17	43663579		Intergenic
rs117347376	cg22968622	34.7592	5.2e-39	17	44240986	Imputed	A	0.134831	17	43663579		Intergenic
rs117353463	cg22968622	34.7592	5.2e-39	17	44206646	Imputed	G	0.134831	17	43663579		Intergenic
rs117356487	cg22968622	34.7592	5.2e-39	17	44191835	Imputed	G	0.134831	17	43663579		Intergenic
rs117380588	cg22968622	34.7591	5.2e-39	17	44351249	Imputed	A	0.13482	17	43663579		Intergenic
rs117384817	cg22968622	34.7592	5.2e-39	17	44166646	Imputed	T	0.134831	17	43663579		Intergenic
rs117387301	cg22968622	34.7592	5.2e-39	17	44260416	Imputed	C	0.134831	17	43663579		Intergenic
rs117403537	cg22968622	34.7592	5.2e-39	17	44258231	Imputed	G	0.134831	17	43663579		Intergenic
rs117403921	cg22968622	34.7592	5.2e-39	17	44264943	Imputed	C	0.134831	17	43663579		Intergenic
rs117410462	cg22968622	34.7592	5.2e-39	17	44194381	Imputed	A	0.134831	17	43663579		Intergenic
rs117413301	cg22968622	34.7592	5.2e-39	17	44176092	Imputed	A	0.134831	17	43663579		Intergenic
rs117414283	cg22968622	34.7592	5.2e-39	17	44249800	Imputed	A	0.134831	17	43663579		Intergenic
rs117427945	cg22968622	34.7592	5.2e-39	17	44275035	Imputed	G	0.134831	17	43663579		Intergenic
rs117444285	cg22968622	34.7592	5.2e-39	17	44241664	Imputed	C	0.134831	17	43663579		Intergenic
rs117453663	cg22968622	34.7592	5.2e-39	17	44348932	Imputed	G	0.134831	17	43663579		Intergenic
rs117460980	cg22968622	34.7592	5.2e-39	17	44292319	Imputed	C	0.134831	17	43663579		Intergenic
rs117462927	cg22968622	34.7592	5.2e-39	17	44262403	Imputed	T	0.134831	17	43663579		Intergenic
rs117465666	cg22968622	34.7592	5.2e-39	17	44233811	Imputed	T	0.134831	17	43663579		Intergenic
rs117465907	cg22968622	34.7591	5.2e-39	17	44347727	Imputed	T	0.13482	17	43663579		Intergenic
rs117470053	cg22968622	34.7592	5.2e-39	17	44182706	Imputed	G	0.134831	17	43663579		Intergenic
rs117474729	cg22968622	34.7592	5.2e-39	17	44266022	Imputed	G	0.134831	17	43663579		Intergenic
rs117484022	cg22968622	34.7592	5.2e-39	17	44277691	Imputed	C	0.134831	17	43663579		Intergenic
rs117503095	cg22968622	34.7592	5.2e-39	17	44181454	Imputed	T	0.134831	17	43663579		Intergenic
rs117504851	cg22968622	34.7592	5.2e-39	17	44203413	Imputed	T	0.134831	17	43663579		Intergenic
rs117507786	cg22968622	34.7592	5.2e-39	17	44186894	Imputed	C	0.134831	17	43663579		Intergenic
rs117520932	cg22968622	34.7592	5.2e-39	17	44164133	Imputed	A	0.134831	17	43663579		Intergenic
rs117535293	cg22968622	34.7592	5.2e-39	17	44209875	Imputed	C	0.134831	17	43663579		Intergenic
rs117537911	cg22968622	34.7592	5.2e-39	17	44344858	Imputed	G	0.134831	17	43663579		Intergenic
rs117540057	cg22968622	34.7592	5.2e-39	17	44206079	Imputed	T	0.134831	17	43663579		Intergenic
rs117541612	cg22968622	34.7592	5.2e-39	17	44178337	Imputed	C	0.134831	17	43663579		Intergenic
rs117548235	cg22968622	34.7592	5.2e-39	17	44177669	Imputed	T	0.134831	17	43663579		Intergenic
rs117557352	cg22968622	34.7592	5.2e-39	17	44194891	Imputed	T	0.134831	17	43663579		Intergenic
rs117567585	cg22968622	34.7592	5.2e-39	17	44243179	Imputed	G	0.134831	17	43663579		Intergenic
rs117576233	cg22968622	34.7592	5.2e-39	17	44179969	Imputed	A	0.134831	17	43663579		Intergenic
rs117579985	cg22968622	34.7592	5.2e-39	17	44272552	Imputed	T	0.134831	17	43663579		Intergenic
rs117591346	cg22968622	34.7592	5.2e-39	17	44213921	Imputed	C	0.134831	17	43663579		Intergenic
rs117592463	cg22968622	34.7592	5.2e-39	17	44197032	Imputed	C	0.134831	17	43663579		Intergenic
rs117595209	cg22968622	34.7592	5.2e-39	17	44180442	Imputed	G	0.134831	17	43663579		Intergenic
rs117598837	cg22968622	34.7592	5.2e-39	17	44269546	Imputed	T	0.134831	17	43663579		Intergenic
rs117618977	cg22968622	34.7592	5.2e-39	17	44255017	Imputed	C	0.134831	17	43663579		Intergenic
rs117619315	cg22968622	34.7592	5.2e-39	17	44174351	Imputed	A	0.134831	17	43663579		Intergenic
rs117638484	cg22968622	34.7592	5.2e-39	17	44189373	Imputed	T	0.134831	17	43663579		Intergenic
rs117639060	cg22968622	34.7591	5.2e-39	17	44350217	Imputed	G	0.13482	17	43663579		Intergenic
rs117639556	cg22968622	34.7592	5.2e-39	17	44237372	Imputed	C	0.134831	17	43663579		Intergenic
rs117643130	cg22968622	34.7592	5.2e-39	17	44223060	Imputed	A	0.134831	17	43663579		Intergenic
rs117645386	cg22968622	34.7592	5.2e-39	17	44234060	Imputed	G	0.134831	17	43663579		Intergenic
rs117645421	cg22968622	34.7592	5.2e-39	17	44268488	Imputed	T	0.134831	17	43663579		Intergenic
rs117648158	cg22968622	34.7592	5.2e-39	17	44248769	Imputed	C	0.134831	17	43663579		Intergenic
rs117652308	cg22968622	34.7592	5.2e-39	17	44279803	Imputed	G	0.134831	17	43663579		Intergenic
rs117659442	cg22968622	34.7592	5.2e-39	17	44310234	Imputed	C	0.134831	17	43663579		Intergenic
rs117686025	cg22968622	34.7591	5.2e-39	17	44350511	Imputed	G	0.13482	17	43663579		Intergenic
rs117687562	cg22968622	34.7587	5.2e-39	17	44327370	Imputed	A	0.134803	17	43663579		Intergenic
rs117700702	cg22968622	34.7591	5.2e-39	17	44349736	Imputed	T	0.13482	17	43663579		Intergenic
rs117704395	cg22968622	34.7592	5.2e-39	17	44192395	Imputed	T	0.134831	17	43663579		Intergenic
rs117709075	cg22968622	34.7592	5.2e-39	17	44218242	Imputed	T	0.134831	17	43663579		Intergenic
rs117710929	cg22968622	34.7592	5.2e-39	17	44166500	Imputed	A	0.134831	17	43663579		Intergenic
rs117711010	cg22968622	34.7592	5.2e-39	17	44203520	Imputed	T	0.134831	17	43663579		Intergenic
rs117713385	cg22968622	34.7592	5.2e-39	17	44237790	Imputed	A	0.134831	17	43663579		Intergenic
rs117713698	cg22968622	34.7592	5.2e-39	17	44170612	Imputed	T	0.134831	17	43663579		Intergenic
rs117714092	cg22968622	34.7592	5.2e-39	17	44186252	Imputed	A	0.134831	17	43663579		Intergenic
rs117727280	cg22968622	34.7592	5.2e-39	17	44183616	Imputed	A	0.134831	17	43663579		Intergenic
rs117732596	cg22968622	34.7592	5.2e-39	17	44172327	Imputed	A	0.134831	17	43663579		Intergenic
rs117740770	cg22968622	34.7592	5.2e-39	17	44201667	Imputed	A	0.134831	17	43663579		Intergenic
rs117748595	cg22968622	34.7592	5.2e-39	17	44267227	Imputed	G	0.134831	17	43663579		Intergenic
rs117758323	cg22968622	34.7592	5.2e-39	17	44236725	Imputed	A	0.134831	17	43663579		Intergenic
rs117759145	cg22968622	34.7592	5.2e-39	17	44263965	Imputed	C	0.134831	17	43663579		Intergenic
rs117764734	cg22968622	34.7592	5.2e-39	17	44241304	Imputed	G	0.134831	17	43663579		Intergenic
rs117765419	cg22968622	34.7592	5.2e-39	17	44267863	Imputed	A	0.134831	17	43663579		Intergenic
rs117770115	cg22968622	34.7591	5.2e-39	17	44348825	Imputed	G	0.13482	17	43663579		Intergenic
rs117778700	cg22968622	34.7592	5.2e-39	17	44205839	Imputed	G	0.134831	17	43663579		Intergenic
rs117783111	cg22968622	34.7592	5.2e-39	17	44262418	Imputed	A	0.134831	17	43663579		Intergenic
rs117783241	cg22968622	34.7592	5.2e-39	17	44293020	Imputed	A	0.134831	17	43663579		Intergenic
rs117790185	cg22968622	34.7592	5.2e-39	17	44279101	Imputed	G	0.134831	17	43663579		Intergenic
rs117794432	cg22968622	34.7592	5.2e-39	17	44258354	Imputed	C	0.134831	17	43663579		Intergenic
rs117796649	cg22968622	34.7592	5.2e-39	17	44227186	Imputed	A	0.134831	17	43663579		Intergenic
rs117807910	cg22968622	34.7592	5.2e-39	17	44181508	Imputed	G	0.134831	17	43663579		Intergenic
rs117823412	cg22968622	34.7592	5.2e-39	17	44194735	Imputed	T	0.134831	17	43663579		Intergenic
rs117825464	cg22968622	34.7592	5.2e-39	17	44188477	Imputed	G	0.134831	17	43663579		Intergenic
rs117834711	cg22968622	34.7592	5.2e-39	17	44180997	Imputed	T	0.134831	17	43663579		Intergenic
rs117839927	cg22968622	34.7592	5.2e-39	17	44201865	Imputed	T	0.134831	17	43663579		Intergenic
rs117842738	cg22968622	34.7592	5.2e-39	17	44184428	Imputed	C	0.134831	17	43663579		Intergenic
rs117846856	cg22968622	34.7592	5.2e-39	17	44209364	Imputed	A	0.134831	17	43663579		Intergenic
rs117852904	cg22968622	34.7592	5.2e-39	17	44265702	Imputed	T	0.134831	17	43663579		Intergenic
rs117859952	cg22968622	34.7592	5.2e-39	17	44217293	Imputed	A	0.134831	17	43663579		Intergenic
rs117861590	cg22968622	34.7592	5.2e-39	17	44273264	Imputed	A	0.134831	17	43663579		Intergenic
rs117864661	cg22968622	34.7592	5.2e-39	17	44209919	Imputed	G	0.134831	17	43663579		Intergenic
rs117865418	cg22968622	34.7592	5.2e-39	17	44206482	Imputed	T	0.134831	17	43663579		Intergenic
rs117866200	cg22968622	34.7592	5.2e-39	17	44178839	Imputed	C	0.134831	17	43663579		Intergenic
rs117867813	cg22968622	34.7592	5.2e-39	17	44266972	Imputed	G	0.134831	17	43663579		Intergenic
rs117868947	cg22968622	34.7592	5.2e-39	17	44234526	Imputed	T	0.134831	17	43663579		Intergenic
rs117876324	cg22968622	34.7592	5.2e-39	17	44258914	Imputed	G	0.134831	17	43663579		Intergenic
rs117885345	cg22968622	34.7591	5.2e-39	17	44350125	Imputed	T	0.13482	17	43663579		Intergenic
rs117891750	cg22968622	34.7592	5.2e-39	17	44199670	Imputed	A	0.134831	17	43663579		Intergenic
rs117896144	cg22968622	34.7592	5.2e-39	17	44346589	Imputed	A	0.134831	17	43663579		Intergenic
rs117909362	cg22968622	34.7592	5.2e-39	17	44181118	Imputed	A	0.134831	17	43663579		Intergenic
rs117916627	cg22968622	34.7592	5.2e-39	17	44267904	Imputed	C	0.134831	17	43663579		Intergenic
rs117918840	cg22968622	34.7592	5.2e-39	17	44201109	Imputed	G	0.134831	17	43663579		Intergenic
rs117928039	cg22968622	34.7592	5.2e-39	17	44249621	Imputed	G	0.134831	17	43663579		Intergenic
rs117931571	cg22968622	34.7592	5.2e-39	17	44274985	Imputed	A	0.134831	17	43663579		Intergenic
rs117933312	cg22968622	34.7591	5.2e-39	17	44350527	Imputed	A	0.13482	17	43663579		Intergenic
rs117934912	cg22968622	34.7592	5.2e-39	17	44171024	Imputed	C	0.134831	17	43663579		Intergenic
rs117938762	cg22968622	34.7592	5.2e-39	17	44238424	Imputed	A	0.134831	17	43663579		Intergenic
rs117941968	cg22968622	34.7592	5.2e-39	17	44347638	Imputed	T	0.134831	17	43663579		Intergenic
rs117942639	cg22968622	34.7592	5.2e-39	17	44272928	Imputed	A	0.134831	17	43663579		Intergenic
rs117943355	cg22968622	34.7591	5.2e-39	17	44349744	Imputed	G	0.13482	17	43663579		Intergenic
rs117953839	cg22968622	34.7592	5.2e-39	17	44215823	Imputed	G	0.134831	17	43663579		Intergenic
rs117961794	cg22968622	34.7592	5.2e-39	17	44202147	Imputed	G	0.134831	17	43663579		Intergenic
rs117965721	cg22968622	34.7592	5.2e-39	17	44229986	Imputed	C	0.134831	17	43663579		Intergenic
rs117971750	cg22968622	34.7592	5.2e-39	17	44194835	Imputed	C	0.134831	17	43663579		Intergenic
rs117988306	cg22968622	34.7592	5.2e-39	17	44338279	Imputed	C	0.134831	17	43663579		Intergenic
rs117991442	cg22968622	34.7592	5.2e-39	17	44289101	Imputed	G	0.134831	17	43663579		Intergenic
rs117992557	cg22968622	34.7592	5.2e-39	17	44231617	Imputed	T	0.134831	17	43663579		Intergenic
rs117994526	cg22968622	34.7592	5.2e-39	17	44267617	Imputed	G	0.134831	17	43663579		Intergenic
rs118008635	cg22968622	34.7592	5.2e-39	17	44178272	Imputed	T	0.134831	17	43663579		Intergenic
rs118012446	cg22968622	34.7592	5.2e-39	17	44166311	Imputed	T	0.134831	17	43663579		Intergenic
rs118015320	cg22968622	34.7592	5.2e-39	17	44196447	Imputed	A	0.134831	17	43663579		Intergenic
rs118016834	cg22968622	34.7592	5.2e-39	17	44228529	Imputed	A	0.134831	17	43663579		Intergenic
rs118017286	cg22968622	34.7592	5.2e-39	17	44251230	Imputed	C	0.134831	17	43663579		Intergenic
rs118017492	cg22968622	34.7592	5.2e-39	17	44255532	Imputed	C	0.134831	17	43663579		Intergenic
rs118018091	cg22968622	34.7592	5.2e-39	17	44225234	Imputed	C	0.134831	17	43663579		Intergenic
rs118024861	cg22968622	34.7592	5.2e-39	17	44194621	Imputed	G	0.134831	17	43663579		Intergenic
rs118025414	cg22968622	34.7592	5.2e-39	17	44215045	Imputed	C	0.134831	17	43663579		Intergenic
rs118034160	cg22968622	34.7592	5.2e-39	17	44211902	Imputed	G	0.134831	17	43663579		Intergenic
rs118041124	cg22968622	34.7592	5.2e-39	17	44345090	Imputed	A	0.134831	17	43663579		Intergenic
rs118044025	cg22968622	34.7592	5.2e-39	17	44257473	Imputed	C	0.134831	17	43663579		Intergenic
rs118052173	cg22968622	34.7592	5.2e-39	17	44180954	Imputed	G	0.134831	17	43663579		Intergenic
rs118056180	cg22968622	34.7592	5.2e-39	17	44170414	Imputed	A	0.134831	17	43663579		Intergenic
rs118063927	cg22968622	34.7592	5.2e-39	17	44198080	Imputed	T	0.134831	17	43663579		Intergenic
rs118067837	cg22968622	34.7592	5.2e-39	17	44348370	Imputed	G	0.134831	17	43663579		Intergenic
rs118070169	cg22968622	34.7592	5.2e-39	17	44191159	Imputed	T	0.134831	17	43663579		Intergenic
rs118073567	cg22968622	34.7592	5.2e-39	17	44246624	Imputed	A	0.134831	17	43663579		Intergenic
rs118073907	cg22968622	34.7592	5.2e-39	17	44221602	Imputed	C	0.134831	17	43663579		Intergenic
rs118074274	cg22968622	34.7592	5.2e-39	17	44196125	Imputed	C	0.134831	17	43663579		Intergenic
rs118079708	cg22968622	34.7592	5.2e-39	17	44208945	Imputed	T	0.134831	17	43663579		Intergenic
rs118090376	cg22968622	34.7592	5.2e-39	17	44227531	Imputed	C	0.134831	17	43663579		Intergenic
rs118091894	cg22968622	34.7592	5.2e-39	17	44288672	Imputed	A	0.134831	17	43663579		Intergenic
rs118100616	cg22968622	34.7592	5.2e-39	17	44280523	Imputed	G	0.134831	17	43663579		Intergenic
rs118113616	cg22968622	34.7591	5.2e-39	17	44348987	Imputed	A	0.13482	17	43663579		Intergenic
rs118119757	cg22968622	34.7592	5.2e-39	17	44291365	Imputed	T	0.134831	17	43663579		Intergenic
rs118131053	cg22968622	34.7592	5.2e-39	17	44231295	Imputed	A	0.134831	17	43663579		Intergenic
rs118137985	cg22968622	34.7592	5.2e-39	17	44228770	Imputed	G	0.134831	17	43663579		Intergenic
rs118142480	cg22968622	34.7592	5.2e-39	17	44226030	Imputed	A	0.134831	17	43663579		Intergenic
rs118143337	cg22968622	34.7592	5.2e-39	17	44247673	Imputed	A	0.134831	17	43663579		Intergenic
rs118152960	cg22968622	34.7592	5.2e-39	17	44221350	Imputed	A	0.134831	17	43663579		Intergenic
rs118154068	cg22968622	34.7592	5.2e-39	17	44216158	Imputed	C	0.134831	17	43663579		Intergenic
rs118161660	cg22968622	34.7592	5.2e-39	17	44265328	Imputed	G	0.134831	17	43663579		Intergenic
rs118181051	cg22968622	34.7592	5.2e-39	17	44181933	Imputed	C	0.134831	17	43663579		Intergenic
rs118186458	cg22968622	34.7592	5.2e-39	17	44197806	Imputed	C	0.134831	17	43663579		Intergenic
rs137984402	cg22968622	34.7592	5.2e-39	17	44276013	Imputed	A	0.134831	17	43663579		Intergenic
rs138180884	cg22968622	34.7587	5.2e-39	17	44326509	Imputed	A	0.134803	17	43663579		Intergenic
rs138327084	cg22968622	34.7592	5.2e-39	17	44242788	Imputed	T	0.134831	17	43663579		Intergenic
rs138527361	cg22968622	34.7592	5.2e-39	17	44277923	Imputed	A	0.134831	17	43663579		Intergenic
rs138881951	cg22968622	34.7592	5.2e-39	17	44274766	Imputed	C	0.134831	17	43663579		Intergenic
rs139438959	cg22968622	34.7592	5.2e-39	17	44346751	Imputed	G	0.134831	17	43663579		Intergenic
rs140087949	cg22968622	34.7592	5.2e-39	17	44313757	Imputed	A	0.134831	17	43663579		Intergenic
rs140226828	cg22968622	34.7591	5.2e-39	17	44349380	Imputed	G	0.13482	17	43663579		Intergenic
rs140697321	cg22968622	34.7592	5.2e-39	17	44280902	Imputed	C	0.134831	17	43663579		Intergenic
rs140861371	cg22968622	34.7592	5.2e-39	17	44165049	Imputed	G	0.134831	17	43663579		Intergenic
rs142380190	cg22968622	34.7592	5.2e-39	17	44188755	Imputed	C	0.134831	17	43663579		Intergenic
rs142475938	cg22968622	34.7592	5.2e-39	17	44205122	Imputed	G	0.134831	17	43663579		Intergenic
rs143171217	cg22968622	34.7592	5.2e-39	17	44348221	Imputed	G	0.134831	17	43663579		Intergenic
rs143353433	cg22968622	34.7592	5.2e-39	17	44302752	Imputed	A	0.134831	17	43663579		Intergenic
rs143485253	cg22968622	34.7592	5.2e-39	17	44165435	Imputed	T	0.134831	17	43663579		Intergenic
rs143807772	cg22968622	34.7592	5.2e-39	17	44209313	Imputed	C	0.134831	17	43663579		Intergenic
rs144064129	cg22968622	34.7592	5.2e-39	17	44321527	Imputed	T	0.134831	17	43663579		Intergenic
rs144140981	cg22968622	34.7592	5.2e-39	17	44346829	Imputed	T	0.134831	17	43663579		Intergenic
rs144205025	cg22968622	34.7592	5.2e-39	17	44191682	Imputed	A	0.134831	17	43663579		Intergenic
rs144566168	cg22968622	34.7591	5.2e-39	17	44348616	Imputed	T	0.13482	17	43663579		Intergenic
rs144580401	cg22968622	34.7592	5.2e-39	17	44165069	Imputed	G	0.134831	17	43663579		Intergenic
rs144626848	cg22968622	34.7592	5.2e-39	17	44277867	Imputed	A	0.134831	17	43663579		Intergenic
rs144690603	cg22968622	34.7592	5.2e-39	17	44344926	Imputed	G	0.134831	17	43663579		Intergenic
rs144921942	cg22968622	34.7587	5.2e-39	17	44327958	Imputed	G	0.134803	17	43663579		Intergenic
rs145644686	cg22968622	34.7592	5.2e-39	17	44182336	Imputed	A	0.134831	17	43663579		Intergenic
rs145758147	cg22968622	34.7592	5.2e-39	17	44193882	Imputed	T	0.134831	17	43663579		Intergenic
rs145848989	cg22968622	34.7592	5.2e-39	17	44301546	Imputed	C	0.134831	17	43663579		Intergenic
rs145868307	cg22968622	34.7592	5.2e-39	17	44178884	Imputed	A	0.134831	17	43663579		Intergenic
rs146250646	cg22968622	34.7592	5.2e-39	17	44291381	Imputed	G	0.134831	17	43663579		Intergenic
rs147014359	cg22968622	34.7587	5.2e-39	17	44326396	Imputed	C	0.134803	17	43663579		Intergenic
rs147061347	cg22968622	34.7592	5.2e-39	17	44242969	Imputed	C	0.134831	17	43663579		Intergenic
rs147315706	cg22968622	34.7592	5.2e-39	17	44258954	Imputed	C	0.134831	17	43663579		Intergenic
rs147462511	cg22968622	34.7592	5.2e-39	17	44165098	Imputed	T	0.134831	17	43663579		Intergenic
rs147642589	cg22968622	34.7592	5.2e-39	17	44300067	Imputed	G	0.134831	17	43663579		Intergenic
rs148294922	cg22968622	34.7591	5.2e-39	17	44350460	Imputed	G	0.13482	17	43663579		Intergenic
rs148382831	cg22968622	34.7591	5.2e-39	17	44349899	Imputed	A	0.13482	17	43663579		Intergenic
rs148736305	cg22968622	34.7592	5.2e-39	17	44224686	Imputed	T	0.134831	17	43663579		Intergenic
rs148802198	cg22968622	34.7592	5.2e-39	17	44259040	Imputed	C	0.134831	17	43663579		Intergenic
rs149426978	cg22968622	34.7592	5.2e-39	17	44263479	Imputed	C	0.134831	17	43663579		Intergenic
rs149740398	cg22968622	34.7592	5.2e-39	17	44351285	Imputed	G	0.134831	17	43663579		Intergenic
rs150038808	cg22968622	34.7592	5.2e-39	17	44298178	Imputed	G	0.134831	17	43663579		Intergenic
rs150320162	cg22968622	34.7592	5.2e-39	17	44349867	Imputed	A	0.134831	17	43663579		Intergenic
rs150471993	cg22968622	34.7592	5.2e-39	17	44316076	Imputed	T	0.134831	17	43663579		Intergenic
rs150594649	cg22968622	34.7592	5.2e-39	17	44291820	Imputed	G	0.134831	17	43663579		Intergenic
rs17577094	cg22968622	34.7592	5.2e-39	17	44187492	Genotyped	G	0.134831	17	43663579		Intergenic
rs17660132	cg22968622	34.7592	5.2e-39	17	44165803	Genotyped	C	0.134831	17	43663579		Intergenic
rs17660464	cg22968622	34.7592	5.2e-39	17	44177993	Genotyped	A	0.134831	17	43663579		Intergenic
rs181575614	cg22968622	34.7592	5.2e-39	17	44308547	Imputed	A	0.134831	17	43663579		Intergenic
rs184069025	cg22968622	34.7592	5.2e-39	17	44274560	Imputed	C	0.134831	17	43663579		Intergenic
rs187810302	cg22968622	34.7592	5.2e-39	17	44204304	Imputed	G	0.134831	17	43663579		Intergenic
rs1881194	cg22968622	34.7592	5.2e-39	17	44248814	Genotyped	A	0.134831	17	43663579		Intergenic
rs2463524	cg22968622	34.7592	5.2e-39	17	44326245	Genotyped	G	0.134831	17	43663579		Intergenic
rs2469933	cg22968622	34.7592	5.2e-39	17	44285531	Genotyped	A	0.134831	17	43663579		Intergenic
rs2532233	cg22968622	34.7592	5.2e-39	17	44273218	Imputed	T	0.134831	17	43663579		Intergenic
rs2532316	cg22968622	34.7592	5.2e-39	17	44213712	Genotyped	A	0.134831	17	43663579		Intergenic
rs2532329	cg22968622	34.7592	5.2e-39	17	44350090	Genotyped	A	0.134831	17	43663579		Intergenic
rs2732651	cg22968622	34.7592	5.2e-39	17	44345063	Genotyped	T	0.134831	17	43663579		Intergenic
rs2732674	cg22968622	34.7592	5.2e-39	17	44280697	Genotyped	C	0.134831	17	43663579		Intergenic
rs2957297	cg22968622	34.7592	5.2e-39	17	44368212	Genotyped	A	0.134831	17	43663579		Intergenic
rs55669501	cg22968622	34.7592	5.2e-39	17	44202564	Imputed	A	0.134831	17	43663579		Intergenic
rs55686102	cg22968622	34.7592	5.2e-39	17	44202608	Imputed	T	0.134831	17	43663579		Intergenic
rs55825513	cg22968622	34.7592	5.2e-39	17	44176215	Imputed	A	0.134831	17	43663579		Intergenic
rs76970448	cg22968622	34.7592	5.2e-39	17	44260967	Imputed	A	0.134831	17	43663579		Intergenic
rs116876337	cg22968622	34.7584	5.21e-39	17	44230166	Imputed	A	0.133455	17	43663579		Intergenic
rs116912938	cg22968622	34.7585	5.21e-39	17	44272679	Imputed	C	0.134843	17	43663579		Intergenic
rs117073527	cg22968622	34.7584	5.21e-39	17	44316888	Imputed	G	0.134899	17	43663579		Intergenic
rs117566552	cg22968622	34.7578	5.21e-39	17	44251243	Imputed	T	0.134624	17	43663579		Intergenic
rs118029804	cg22968622	34.7582	5.21e-39	17	44245171	Imputed	T	0.133489	17	43663579		Intergenic
rs118108313	cg22968622	34.7582	5.21e-39	17	44244896	Imputed	G	0.133489	17	43663579		Intergenic
rs144094388	cg22968622	34.7585	5.21e-39	17	44328668	Imputed	G	0.134799	17	43663579		Intergenic
rs149955234	cg22968622	34.7581	5.21e-39	17	44183790	Imputed	A	0.133457	17	43663579		Intergenic
rs2668668	cg22968622	34.7586	5.21e-39	17	44284641	Imputed	G	0.13486	17	43663579		Intergenic
rs148470649	cg22968622	34.757	5.22e-39	17	44285142	Imputed	C	0.134843	17	43663579		Intergenic
chr17:44182845:I	cg22968622	34.7568	5.23e-39	17	44182845	Imputed	TG	0.13482	17	43663579		Intergenic
rs118108956	cg22968622	34.7567	5.23e-39	17	44270293	Imputed	T	0.13486	17	43663579		Intergenic
rs118044923	cg22968622	34.7553	5.24e-39	17	44229415	Imputed	C	0.133428	17	43663579		Intergenic
rs113518294	cg22968622	34.7549	5.25e-39	17	44226561	Imputed	G	0.134624	17	43663579		Intergenic
rs117090147	cg22968622	34.7545	5.25e-39	17	44188645	Imputed	T	0.134652	17	43663579		Intergenic
rs117436329	cg22968622	34.7547	5.25e-39	17	44185245	Imputed	A	0.134854	17	43663579		Intergenic
rs117915297	cg22968622	34.7547	5.25e-39	17	44271152	Imputed	A	0.134854	17	43663579		Intergenic
rs118055851	cg22968622	34.7547	5.25e-39	17	44271512	Imputed	C	0.134619	17	43663579		Intergenic
rs147239733	cg22968622	34.7546	5.25e-39	17	44305186	Imputed	C	0.13486	17	43663579		Intergenic
chr17:44275649:D	cg22968622	34.7536	5.26e-39	17	44275649	Imputed	C	0.13491	17	43663579		Intergenic
rs113507264	cg22968622	34.7538	5.26e-39	17	44340253	Imputed	G	0.134893	17	43663579		Intergenic
rs116939600	cg22968622	34.7534	5.26e-39	17	44282007	Imputed	C	0.133511	17	43663579		Intergenic
rs117271057	cg22968622	34.7538	5.26e-39	17	44340525	Imputed	C	0.134893	17	43663579		Intergenic
rs117374804	cg22968622	34.7538	5.26e-39	17	44344097	Imputed	C	0.134893	17	43663579		Intergenic
rs117512131	cg22968622	34.7534	5.26e-39	17	44281308	Imputed	A	0.133511	17	43663579		Intergenic
rs117873919	cg22968622	34.7541	5.26e-39	17	44344810	Imputed	G	0.13486	17	43663579		Intergenic
rs117969095	cg22968622	34.7542	5.26e-39	17	44288156	Imputed	C	0.134904	17	43663579		Intergenic
rs118004776	cg22968622	34.7538	5.26e-39	17	44339473	Imputed	G	0.134893	17	43663579		Intergenic
rs141163281	cg22968622	34.7534	5.26e-39	17	44281722	Imputed	C	0.133511	17	43663579		Intergenic
rs142622006	cg22968622	34.7534	5.26e-39	17	44281588	Imputed	C	0.133511	17	43663579		Intergenic
rs145604922	cg22968622	34.7538	5.26e-39	17	44351858	Imputed	G	0.134631	17	43663579		Intergenic
rs147945889	cg22968622	34.7534	5.26e-39	17	44179749	Imputed	A	0.134657	17	43663579		Intergenic
rs150652921	cg22968622	34.7537	5.26e-39	17	44318575	Imputed	G	0.134904	17	43663579		Intergenic
rs79098809	cg22968622	34.7538	5.26e-39	17	44340506	Imputed	G	0.134893	17	43663579		Intergenic
rs117817544	cg22968622	34.7526	5.27e-39	17	44347561	Imputed	C	0.133506	17	43663579		Intergenic
rs118042866	cg22968622	34.7526	5.27e-39	17	44347557	Imputed	A	0.133506	17	43663579		Intergenic
rs142815515	cg22968622	34.7534	5.27e-39	17	44316389	Imputed	A	0.134766	17	43663579		Intergenic
rs112626579	cg22968622	34.7521	5.28e-39	17	44192946	Imputed	T	0.134635	17	43663579		Intergenic
rs112980803	cg22968622	34.7524	5.28e-39	17	44343125	Imputed	T	0.134904	17	43663579		Intergenic
rs113459271	cg22968622	34.7521	5.28e-39	17	44192923	Imputed	G	0.134635	17	43663579		Intergenic
rs116906708	cg22968622	34.7525	5.28e-39	17	44276821	Imputed	A	0.134916	17	43663579		Intergenic
rs116950386	cg22968622	34.7521	5.28e-39	17	44186055	Imputed	A	0.13464	17	43663579		Intergenic
rs117025337	cg22968622	34.7521	5.28e-39	17	44226126	Imputed	C	0.13464	17	43663579		Intergenic
rs117462267	cg22968622	34.7525	5.28e-39	17	44276618	Imputed	G	0.134916	17	43663579		Intergenic
rs117679798	cg22968622	34.7521	5.28e-39	17	44349283	Imputed	C	0.134809	17	43663579		Intergenic
rs117838917	cg22968622	34.7521	5.28e-39	17	44177755	Imputed	G	0.13464	17	43663579		Intergenic
rs117970546	cg22968622	34.7524	5.28e-39	17	44223593	Imputed	C	0.134506	17	43663579		Intergenic
rs117974938	cg22968622	34.7525	5.28e-39	17	44276578	Imputed	C	0.134916	17	43663579		Intergenic
rs118177173	cg22968622	34.7521	5.28e-39	17	44177097	Imputed	T	0.13464	17	43663579		Intergenic
rs118093314	cg22968622	34.7509	5.29e-39	17	44283761	Imputed	T	0.134871	17	43663579		Intergenic
rs118036382	cg22968622	34.7504	5.3e-39	17	44233589	Imputed	C	0.134983	17	43663579		Intergenic
rs117317248	cg22968622	34.7494	5.31e-39	17	44357796	Imputed	T	0.13336	17	43663579		Intergenic
rs117415454	cg22968622	34.7497	5.31e-39	17	44245766	Imputed	A	0.133468	17	43663579		Intergenic
rs118172521	cg22968622	34.7496	5.31e-39	17	44283479	Imputed	C	0.134876	17	43663579		Intergenic
rs149056210	cg22968622	34.749	5.32e-39	17	44282979	Imputed	A	0.134876	17	43663579		Intergenic
rs150079804	cg22968622	34.7474	5.33e-39	17	44226980	Imputed	G	0.13458	17	43663579		Intergenic
rs113449071	cg22968622	34.7473	5.34e-39	17	44359663	Imputed	T	0.135157	17	43663579		Intergenic
rs117025231	cg22968622	34.7469	5.34e-39	17	44283022	Imputed	G	0.134888	17	43663579		Intergenic
rs117659948	cg22968622	34.7455	5.36e-39	17	44282892	Imputed	C	0.134893	17	43663579		Intergenic
rs148072382	cg22968622	34.744	5.37e-39	17	44363632	Imputed	C	0.134803	17	43663579		Intergenic
rs111937957	cg22968622	34.742	5.4e-39	17	44356949	Imputed	C	0.134962	17	43663579		Intergenic
rs112146499	cg22968622	34.742	5.4e-39	17	44356890	Imputed	C	0.134962	17	43663579		Intergenic
rs112773568	cg22968622	34.742	5.4e-39	17	44357297	Imputed	T	0.134961	17	43663579		Intergenic
rs111754884	cg22968622	34.7409	5.41e-39	17	44355602	Imputed	G	0.134904	17	43663579		Intergenic
chr17:44345047:I	cg22968622	34.7398	5.42e-39	17	44345047	Imputed	ACT	0.134871	17	43663579		Intergenic
rs111519325	cg22968622	34.7397	5.43e-39	17	44355634	Imputed	A	0.134961	17	43663579		Intergenic
rs141116213	cg22968622	34.7382	5.44e-39	17	44352361	Imputed	T	0.135309	17	43663579		Intergenic
chr17:44207900:I	cg22968622	34.738	5.45e-39	17	44207900	Imputed	ACT	0.134972	17	43663579		Intergenic
rs116992865	cg22968622	34.738	5.45e-39	17	44207887	Imputed	T	0.134972	17	43663579		Intergenic
rs117392678	cg22968622	34.738	5.45e-39	17	44208218	Imputed	G	0.134972	17	43663579		Intergenic
rs117421979	cg22968622	34.738	5.45e-39	17	44207932	Imputed	G	0.134972	17	43663579		Intergenic
rs117643442	cg22968622	34.738	5.45e-39	17	44208144	Imputed	G	0.134972	17	43663579		Intergenic
rs117747674	cg22968622	34.738	5.45e-39	17	44207778	Imputed	G	0.134972	17	43663579		Intergenic
rs142585607	cg22968622	34.7379	5.45e-39	17	44355130	Imputed	G	0.134809	17	43663579		Intergenic
rs140599694	cg22968622	34.7367	5.46e-39	17	44360071	Imputed	C	0.134747	17	43663579		Intergenic
rs116889916	cg22968622	34.7326	5.51e-39	17	44284542	Imputed	A	0.135028	17	43663579		Intergenic
rs141775015	cg22968622	34.731	5.53e-39	17	44363718	Imputed	C	0.13468	17	43663579		Intergenic
rs117153599	cg22968622	34.7301	5.54e-39	17	44284057	Imputed	T	0.135039	17	43663579		Intergenic
rs118114094	cg22968622	34.7292	5.55e-39	17	44316449	Imputed	C	0.134972	17	43663579		Intergenic
rs113173278	cg22968622	34.7285	5.56e-39	17	44360168	Imputed	G	0.134685	17	43663579		Intergenic
rs144784350	cg22968622	34.7285	5.56e-39	17	44361861	Imputed	G	0.134685	17	43663579		Intergenic
rs146928285	cg22968622	34.7285	5.56e-39	17	44362410	Imputed	G	0.134685	17	43663579		Intergenic
rs148140820	cg22968622	34.7285	5.56e-39	17	44361869	Imputed	C	0.134685	17	43663579		Intergenic
rs149088375	cg22968622	34.7285	5.56e-39	17	44362349	Imputed	T	0.134685	17	43663579		Intergenic
rs151047288	cg22968622	34.7285	5.56e-39	17	44360238	Imputed	G	0.134685	17	43663579		Intergenic
rs2732622	cg22968622	34.7285	5.56e-39	17	44361523	Imputed	A	0.134685	17	43663579		Intergenic
rs113124989	cg22968622	34.7264	5.58e-39	17	44284734	Imputed	C	0.135163	17	43663579		Intergenic
rs112565375	cg22968622	34.726	5.59e-39	17	44356682	Imputed	A	0.134702	17	43663579		Intergenic
rs117205063	cg22968622	34.726	5.59e-39	17	44354587	Imputed	G	0.134702	17	43663579		Intergenic
rs117233587	cg22968622	34.726	5.59e-39	17	44354980	Imputed	A	0.134702	17	43663579		Intergenic
rs117526238	cg22968622	34.726	5.59e-39	17	44356098	Imputed	C	0.134702	17	43663579		Intergenic
rs138908635	cg22968622	34.726	5.59e-39	17	44356433	Imputed	T	0.134702	17	43663579		Intergenic
rs142817709	cg22968622	34.726	5.59e-39	17	44354908	Imputed	T	0.134702	17	43663579		Intergenic
chr17:44256811:I	cg22968622	34.7243	5.61e-39	17	44256811	Imputed	AACAAG	0.135331	17	43663579		Intergenic
rs142077020	cg22968622	34.721	5.65e-39	17	44332970	Imputed	G	0.132277	17	43663579		Intergenic
rs117477859	cg22968622	34.7061	5.84e-39	17	44250236	Imputed	G	0.134725	17	43663579		Intergenic
rs117673467	cg22968622	34.6997	5.92e-39	17	44283139	Imputed	A	0.135393	17	43663579		Intergenic
rs147699416	cg22968622	34.6987	5.93e-39	17	44367966	Imputed	T	0.134524	17	43663579		Intergenic
rs112826856	cg22968622	34.6981	5.94e-39	17	44357466	Imputed	T	0.13373	17	43663579		Intergenic
rs117405727	cg22968622	34.6966	5.96e-39	17	44226817	Imputed	A	0.1345	17	43663579		Intergenic
rs117163819	cg22968622	34.6931	6.01e-39	17	44230269	Imputed	C	0.129978	17	43663579		Intergenic
rs117689023	cg22968622	34.6924	6.02e-39	17	44176170	Imputed	G	0.135556	17	43663579		Intergenic
chr17:44357412:D	cg22968622	34.6846	6.12e-39	17	44357412	Imputed	T	0.134034	17	43663579		Intergenic
rs111693597	cg22968622	34.6846	6.12e-39	17	44357453	Imputed	T	0.134034	17	43663579		Intergenic
rs112249029	cg22968622	34.6843	6.12e-39	17	44357777	Imputed	T	0.134039	17	43663579		Intergenic
rs113377745	cg22968622	34.6846	6.12e-39	17	44357351	Imputed	C	0.134034	17	43663579		Intergenic
rs140446185	cg22968622	34.6825	6.15e-39	17	44327070	Imputed	A	0.137717	17	43663579		Intergenic
rs113726467	cg22968622	34.682	6.16e-39	17	44343371	Imputed	A	0.135101	17	43663579		Intergenic
rs139789399	cg22968622	34.6723	6.29e-39	17	44318663	Imputed	A	0.135978	17	43663579		Intergenic
rs113431630	cg22968622	34.6696	6.32e-39	17	44357761	Imputed	A	0.13377	17	43663579		Intergenic
rs117799771	cg22968622	34.6638	6.41e-39	17	44272000	Imputed	A	0.135163	17	43663579		Intergenic
rs144246842	cg22968622	34.6637	6.41e-39	17	44211502	Imputed	A	0.135079	17	43663579		Intergenic
rs112254607	cg22968622	34.6611	6.44e-39	17	44357392	Imputed	A	0.133577	17	43663579		Intergenic
rs117630747	cg22968622	34.6588	6.48e-39	17	44270985	Imputed	A	0.135534	17	43663579		Intergenic
rs112672130	cg22968622	34.6509	6.59e-39	17	44290910	Imputed	G	0.135663	17	43663579		Intergenic
rs112464485	cg22968622	34.6452	6.67e-39	17	44344385	Imputed	A	0.138631	17	43663579		Intergenic
rs139629001	cg22968622	34.6305	6.89e-39	17	44174068	Imputed	C	0.13577	17	43663579		Intergenic
rs118039215	cg22968622	34.623	7e-39	17	44269442	Imputed	C	0.131371	17	43663579		Intergenic
rs184967539	cg22968622	34.6187	7.07e-39	17	44338534	Imputed	T	0.136551	17	43663579		Intergenic
chr17:44219978:D	cg22968622	34.6146	7.13e-39	17	44219978	Imputed	T	0.13491	17	43663579		Intergenic
rs112762364	cg22968622	34.6149	7.13e-39	17	44251698	Imputed	A	0.135197	17	43663579		Intergenic
rs116856926	cg22968622	34.6149	7.13e-39	17	44254494	Imputed	C	0.135197	17	43663579		Intergenic
rs117108740	cg22968622	34.6149	7.13e-39	17	44254379	Imputed	T	0.135197	17	43663579		Intergenic
rs117278623	cg22968622	34.6149	7.13e-39	17	44252197	Imputed	T	0.135197	17	43663579		Intergenic
rs117334575	cg22968622	34.6149	7.13e-39	17	44253203	Imputed	C	0.135197	17	43663579		Intergenic
rs117647599	cg22968622	34.6149	7.13e-39	17	44252510	Imputed	C	0.135197	17	43663579		Intergenic
rs117738056	cg22968622	34.6149	7.13e-39	17	44251907	Imputed	T	0.135197	17	43663579		Intergenic
rs117974219	cg22968622	34.6149	7.13e-39	17	44253364	Imputed	A	0.135197	17	43663579		Intergenic
rs118141983	cg22968622	34.6149	7.13e-39	17	44252416	Imputed	C	0.135197	17	43663579		Intergenic
rs138103585	cg22968622	34.6149	7.13e-39	17	44251972	Imputed	A	0.135197	17	43663579		Intergenic
rs140742560	cg22968622	34.6149	7.13e-39	17	44254413	Imputed	G	0.135197	17	43663579		Intergenic
rs148326402	cg22968622	34.6149	7.13e-39	17	44251769	Imputed	G	0.135197	17	43663579		Intergenic
rs117277236	cg22968622	34.6078	7.24e-39	17	44364519	Imputed	G	0.138002	17	43663579		Intergenic
rs112062294	cg22968622	34.6073	7.25e-39	17	44296182	Imputed	T	0.136517	17	43663579		Intergenic
rs112830278	cg22968622	34.6073	7.25e-39	17	44296251	Imputed	C	0.136517	17	43663579		Intergenic
rs113917194	cg22968622	34.6073	7.25e-39	17	44296230	Imputed	A	0.136517	17	43663579		Intergenic
rs140535129	cg22968622	34.5981	7.4e-39	17	44336237	Imputed	T	0.13517	17	43663579		Intergenic
rs112624390	cg22968622	34.5893	7.54e-39	17	44343291	Imputed	G	0.136697	17	43663579		Intergenic
rs112945576	cg22968622	34.5893	7.54e-39	17	44343282	Imputed	A	0.136697	17	43663579		Intergenic
rs113211824	cg22968622	34.5893	7.54e-39	17	44343304	Imputed	A	0.136697	17	43663579		Intergenic
rs145064732	cg22968622	34.5884	7.56e-39	17	44361007	Imputed	G	0.135697	17	43663579		Intergenic
rs2458218	cg22968622	34.584	7.63e-39	17	44361383	Imputed	C	0.135607	17	43663579		Intergenic
rs138195950	cg22968622	34.5835	7.64e-39	17	44360580	Imputed	G	0.13564	17	43663579		Intergenic
rs144834741	cg22968622	34.5792	7.71e-39	17	44311107	Imputed	C	0.12603	17	43663579		Intergenic
rs148396165	cg22968622	34.5783	7.73e-39	17	44365897	Imputed	T	0.135539	17	43663579		Intergenic
rs138073637	cg22968622	34.5562	8.11e-39	17	44340942	Imputed	C	0.138326	17	43663579		Intergenic
rs113744298	cg22968622	34.5491	8.24e-39	17	44304130	Imputed	G	0.130119	17	43663579		Intergenic
rs149619702	cg22968622	34.5401	8.4e-39	17	44362633	Imputed	T	0.135826	17	43663579		Intergenic
rs117847200	cg22968622	34.5247	8.69e-39	17	44195424	Imputed	C	0.13541	17	43663579		Intergenic
rs112340920	cg22968622	34.5153	8.87e-39	17	44290759	Imputed	C	0.135764	17	43663579		Intergenic
rs111843786	cg22968622	34.5073	9.03e-39	17	44369320	Imputed	T	0.135805	17	43663579		Intergenic
rs148510968	cg22968622	34.4899	9.38e-39	17	44369224	Imputed	G	0.135766	17	43663579		Intergenic
rs139611916	cg22968622	34.4564	1.01e-38	17	44316491	Imputed	C	0.125056	17	43663579		Intergenic
rs149218032	cg22968622	34.406	1.13e-38	17	44363929	Imputed	T	0.136191	17	43663579		Intergenic
rs113338573	cg22968622	34.4031	1.14e-38	17	44357677	Imputed	A	0.137197	17	43663579		Intergenic
rs117256452	cg22968622	34.4014	1.14e-38	17	44222080	Imputed	C	0.134298	17	43663579		Intergenic
rs138140646	cg22968622	34.3861	1.18e-38	17	44327082	Imputed	T	0.137063	17	43663579		Intergenic
rs117241896	cg22968622	34.3728	1.21e-38	17	44345653	Imputed	G	0.135281	17	43663579		Intergenic
rs117867119	cg22968622	34.368	1.23e-38	17	44239556	Imputed	C	0.135236	17	43663579		Intergenic
chr17:44325593:D	cg22968622	34.3627	1.24e-38	17	44325593	Imputed	T	0.135494	17	43663579		Intergenic
rs116895926	cg22968622	34.3608	1.25e-38	17	44244581	Imputed	C	0.135281	17	43663579		Intergenic
chr17:44177304:D	cg22968622	34.3546	1.26e-38	17	44177304	Imputed	T	0.135287	17	43663579		Intergenic
rs117312939	cg22968622	34.3118	1.39e-38	17	44278742	Imputed	G	0.137163	17	43663579		Intergenic
rs117538072	cg22968622	34.3076	1.4e-38	17	44289291	Imputed	C	0.135449	17	43663579		Intergenic
rs148520777	cg22968622	34.306	1.41e-38	17	44333121	Imputed	A	0.128219	17	43663579		Intergenic
rs117516366	cg22968622	34.2979	1.43e-38	17	44354103	Imputed	G	0.136944	17	43663579		Intergenic
rs117355890	cg22968622	34.2563	1.57e-38	17	44318471	Imputed	T	0.123719	17	43663579		Intergenic
rs117808236	cg22968622	34.2568	1.57e-38	17	44353728	Imputed	G	0.137421	17	43663579		Intergenic
rs149753849	cg22968622	34.2511	1.59e-38	17	44316509	Imputed	C	0.12359	17	43663579		Intergenic
rs149459294	cg22968622	34.2408	1.63e-38	17	44326619	Imputed	G	0.136871	17	43663579		Intergenic
rs117629818	cg22968622	34.2256	1.68e-38	17	44353693	Imputed	C	0.137331	17	43663579		Intergenic
rs112366853	cg22968622	34.1679	1.91e-38	17	44314066	Imputed	G	0.135721	17	43663579		Intergenic
rs144325060	cg22968622	34.1212	2.12e-38	17	44296801	Imputed	C	0.126839	17	43663579		Intergenic
rs138880472	cg22968622	33.9376	3.19e-38	17	44368946	Imputed	C	0.137145	17	43663579		Intergenic
rs117448730	cg22968622	33.8798	3.63e-38	17	44366665	Imputed	T	0.136758	17	43663579		Intergenic
chr17:44325225:I	cg22968622	33.8742	3.68e-38	17	44325225	Imputed	AAAT	0.139153	17	43663579		Intergenic
rs117088971	cg22968622	33.8523	3.86e-38	17	44343719	Imputed	T	0.138715	17	43663579		Intergenic
rs145612305	cg22968622	33.834	4.02e-38	17	44242637	Imputed	T	0.130582	17	43663579		Intergenic
chr17:44241487:D	cg22968622	33.8237	4.12e-38	17	44241487	Imputed	C	0.131831	17	43663579		Intergenic
rs118041965	cg22968622	33.82	4.15e-38	17	44304740	Imputed	T	0.138876	17	43663579		Intergenic
rs148682680	cg22968622	33.6536	6.03e-38	17	44243739	Imputed	A	0.131904	17	43663579		Intergenic
rs117219290	cg22968622	33.6465	6.13e-38	17	44242574	Imputed	A	0.131725	17	43663579		Intergenic
rs141868657	cg22968622	33.635	6.29e-38	17	44174235	Imputed	G	0.122242	17	43663579		Intergenic
rs55790833	cg22968622	33.6302	6.35e-38	17	44315677	Imputed	A	0.122142	17	43663579		Intergenic
rs117795763	cg22968622	33.6203	6.5e-38	17	44242536	Imputed	T	0.132103	17	43663579		Intergenic
rs112415401	cg22968622	33.6146	6.58e-38	17	44357645	Imputed	A	0.132315	17	43663579		Intergenic
rs117241638	cg22968622	33.5657	7.35e-38	17	44295795	Imputed	A	0.140015	17	43663579		Intergenic
rs114175826	cg12093005	-33.5321	7.93e-38	6	29986324	Imputed	A	0.0674157	12	133086067	FBRSL1	Body
rs114392697	cg12093005	-33.5321	7.93e-38	6	29559238	Imputed	C	0.0674157	12	133086067	FBRSL1	Body
rs115203830	cg12093005	-33.5321	7.93e-38	6	29549653	Imputed	G	0.0674157	12	133086067	FBRSL1	Body
rs115870917	cg12093005	-33.5321	7.93e-38	6	29607101	Imputed	C	0.0674157	12	133086067	FBRSL1	Body
rs1235162	cg12093005	-33.5321	7.93e-38	6	29537224	Genotyped	G	0.0674157	12	133086067	FBRSL1	Body
rs1264706	cg12093005	-33.5321	7.93e-38	6	30063652	Genotyped	G	0.0674157	12	133086067	FBRSL1	Body
rs8321	cg12093005	-33.5321	7.93e-38	6	30032522	Genotyped	C	0.0674157	12	133086067	FBRSL1	Body
rs9261290	cg12093005	-33.5321	7.93e-38	6	30038647	Genotyped	C	0.0674157	12	133086067	FBRSL1	Body
rs114115096	cg12093005	-33.5121	8.29e-38	6	29970960	Imputed	C	0.0674719	12	133086067	FBRSL1	Body
rs188911488	cg22968622	33.5105	8.32e-38	17	44314686	Imputed	C	0.124545	17	43663579		Intergenic
chr17:44349136:D	cg22968622	33.3641	1.16e-37	17	44349136	Imputed	C	0.141203	17	43663579		Intergenic
rs113578183	cg22968622	33.1474	1.9e-37	17	44344531	Imputed	A	0.12577	17	43663579		Intergenic
rs112806969	cg22968622	33.1363	1.94e-37	17	44344178	Imputed	G	0.142067	17	43663579		Intergenic
chr17:44327642:D	cg22968622	33.0777	2.22e-37	17	44327642	Imputed	A	0.138612	17	43663579		Intergenic
rs111413387	cg22968622	33.0527	2.35e-37	17	44344409	Imputed	C	0.142944	17	43663579		Intergenic
rs117275691	cg22968622	33.0268	2.5e-37	17	44344988	Imputed	G	0.138502	17	43663579		Intergenic
rs118145560	cg22968622	33.0243	2.51e-37	17	44339408	Imputed	T	0.138483	17	43663579		Intergenic
rs117912506	cg22968622	33.0203	2.53e-37	17	44237068	Imputed	T	0.138494	17	43663579		Intergenic
rs112921850	cg22968622	32.9256	3.15e-37	17	44286128	Imputed	G	0.139978	17	43663579		Intergenic
rs74675221	cg22968622	32.8744	3.54e-37	17	44355714	Imputed	G	0.139635	17	43663579		Intergenic
rs74807476	cg22968622	32.8744	3.54e-37	17	44355726	Imputed	A	0.139635	17	43663579		Intergenic
rs111614649	cg22968622	32.8647	3.62e-37	17	44285952	Imputed	C	0.13959	17	43663579		Intergenic
rs112253034	cg22968622	32.8647	3.62e-37	17	44286089	Imputed	A	0.13959	17	43663579		Intergenic
rs117625380	cg22968622	32.8607	3.65e-37	17	44284420	Imputed	T	0.139618	17	43663579		Intergenic
chr17:44315946:D	cg22968622	32.8087	4.11e-37	17	44315946	Imputed	T	0.116705	17	43663579		Intergenic
rs117960011	cg22968622	32.8017	4.18e-37	17	44353885	Imputed	A	0.14058	17	43663579		Intergenic
rs149428764	cg22968622	32.7709	4.49e-37	17	44286198	Imputed	A	0.139904	17	43663579		Intergenic
rs138247699	cg22968622	32.7687	4.51e-37	17	44324185	Imputed	G	0.136754	17	43663579		Intergenic
rs148593484	cg22968622	32.7432	4.78e-37	17	44364829	Imputed	C	0.137663	17	43663579		Intergenic
rs117880170	cg22968622	32.6886	5.42e-37	17	44354549	Imputed	G	0.139385	17	43663579		Intergenic
rs117402769	cg22968622	32.6563	5.84e-37	17	44302881	Imputed	T	0.137511	17	43663579		Intergenic
rs145141330	cg22968622	32.6539	5.88e-37	17	44318295	Imputed	G	0.119569	17	43663579		Intergenic
rs117586206	cg22968622	32.6529	5.89e-37	17	44350919	Imputed	C	0.137478	17	43663579		Intergenic
rs112539198	cg22968622	32.5464	7.53e-37	17	44344446	Imputed	T	0.137264	17	43663579		Intergenic
rs117766513	cg22968622	32.5424	7.6e-37	17	44346445	Imputed	A	0.125949	17	43663579		Intergenic
rs142410300	cg22968622	32.5312	7.8e-37	17	44367271	Imputed	T	0.126468	17	43663579		Intergenic
chr17:44166078:D	cg22968622	32.4846	8.69e-37	17	44166078	Imputed	A	0.126912	17	43663579		Intergenic
chr17:44366377:D	cg22968622	32.4655	9.09e-37	17	44366377	Imputed	T	0.130489	17	43663579		Intergenic
chr17:44166075:I	cg22968622	32.4569	9.27e-37	17	44166075	Imputed	TA	0.128497	17	43663579		Intergenic
rs118125539	cg22968622	32.3753	1.12e-36	17	44239958	Imputed	T	0.138073	17	43663579		Intergenic
rs148238108	cg22968622	32.3077	1.31e-36	17	44366410	Imputed	C	0.138691	17	43663579		Intergenic
rs117665459	cg22968622	32.226	1.59e-36	17	44350310	Imputed	A	0.128844	17	43663579		Intergenic
chr17:44354569:D	cg22968622	32.2228	1.6e-36	17	44354569	Imputed	T	0.129378	17	43663579		Intergenic
chr17:44350296:D	cg22968622	32.196	1.7e-36	17	44350296	Imputed	A	0.129079	17	43663579		Intergenic
rs187481091	cg22968622	32.126	2e-36	17	44166080	Imputed	A	0.130096	17	43663579		Intergenic
rs117964468	cg22968622	32.1167	2.05e-36	17	44234064	Imputed	A	0.130143	17	43663579		Intergenic
rs117919859	cg22968622	32.1052	2.1e-36	17	44259919	Imputed	G	0.130288	17	43663579		Intergenic
rs144515487	cg22968622	32.0674	2.3e-36	17	44294786	Imputed	G	0.139084	17	43663579		Intergenic
rs118168717	cg22968622	32.066	2.31e-36	17	44365981	Imputed	T	0.144438	17	43663579		Intergenic
rs117197430	cg22968622	32.0381	2.46e-36	17	44221476	Imputed	T	0.130084	17	43663579		Intergenic
rs117193465	cg22968622	32.0134	2.61e-36	17	44225607	Imputed	T	0.13028	17	43663579		Intergenic
rs138919987	cg22968622	32.0099	2.63e-36	17	44317103	Imputed	C	0.139876	17	43663579		Intergenic
rs139489216	cg22968622	32.0098	2.63e-36	17	44338967	Imputed	C	0.130034	17	43663579		Intergenic
rs117848121	cg22968622	31.9967	2.71e-36	17	44229073	Imputed	A	0.130313	17	43663579		Intergenic
rs146509604	cg22968622	31.9959	2.72e-36	17	44295695	Imputed	G	0.130478	17	43663579		Intergenic
chr17:44259313:I	cg22968622	31.9818	2.81e-36	17	44259313	Imputed	TA	0.130351	17	43663579		Intergenic
chr17:44201358:D	cg22968622	31.9621	2.94e-36	17	44201358	Imputed	T	0.130631	17	43663579		Intergenic
rs117384985	cg22968622	31.9604	2.95e-36	17	44201344	Imputed	C	0.130635	17	43663579		Intergenic
rs118040610	cg22968622	31.9491	3.03e-36	17	44265477	Imputed	C	0.130652	17	43663579		Intergenic
rs117537618	cg22968622	31.9473	3.05e-36	17	44181681	Imputed	G	0.130659	17	43663579		Intergenic
rs141426423	cg22968622	31.9473	3.05e-36	17	44173812	Imputed	A	0.130659	17	43663579		Intergenic
rs117005396	cg22968622	31.9403	3.1e-36	17	44351387	Imputed	T	0.138608	17	43663579		Intergenic
rs118105515	cg22968622	31.9234	3.22e-36	17	44352131	Imputed	T	0.137013	17	43663579		Intergenic
rs147680653	cg12093005	-31.9229	3.23e-36	6	29752808	Imputed	G	0.0565337	12	133086067	FBRSL1	Body
rs144116717	cg22968622	31.8169	4.14e-36	17	44334768	Imputed	G	0.13131	17	43663579		Intergenic
rs112534607	cg22968622	31.8134	4.18e-36	17	44344376	Imputed	A	0.138998	17	43663579		Intergenic
chr17:44342747:I	cg22968622	31.7205	5.2e-36	17	44342747	Imputed	TC	0.122906	17	43663579		Intergenic
chr17:44269836:D	cg22968622	31.6991	5.47e-36	17	44269836	Imputed	C	0.122546	17	43663579		Intergenic
rs142039218	cg22968622	31.6902	5.59e-36	17	44334288	Imputed	G	0.139635	17	43663579		Intergenic
rs117817959	cg22968622	31.6865	5.64e-36	17	44334052	Imputed	A	0.143263	17	43663579		Intergenic
rs112036534	cg22968622	31.6361	6.35e-36	17	44335665	Imputed	T	0.125417	17	43663579		Intergenic
rs111571338	cg22968622	31.6082	6.79e-36	17	44335806	Imputed	C	0.125471	17	43663579		Intergenic
rs151252166	cg22968622	31.4321	1.03e-35	17	44192568	Imputed	T	0.12491	17	43663579		Intergenic
chr17:44282519:I	cg22968622	31.4198	1.06e-35	17	44282519	Imputed	TA	0.127687	17	43663579		Intergenic
rs139437952	cg22968622	31.349	1.26e-35	17	44297718	Imputed	G	0.121287	17	43663579		Intergenic
rs111479912	cg22968622	31.3185	1.35e-35	17	44335818	Imputed	G	0.127024	17	43663579		Intergenic
rs147529367	cg22968622	31.2637	1.54e-35	17	44327438	Imputed	G	0.143693	17	43663579		Intergenic
rs148912705	cg22968622	31.1945	1.82e-35	17	44367170	Imputed	A	0.136291	17	43663579		Intergenic
rs111453466	cg22968622	30.9975	2.93e-35	17	44357662	Imputed	A	0.120486	17	43663579		Intergenic
rs112161826	cg22968622	30.9912	2.97e-35	17	44355532	Imputed	A	0.12923	17	43663579		Intergenic
rs113960520	cg22968622	30.9912	2.97e-35	17	44355516	Imputed	C	0.12923	17	43663579		Intergenic
rs116892935	cg22968622	30.9819	3.04e-35	17	44273664	Imputed	G	0.129449	17	43663579		Intergenic
rs151001696	cg22968622	30.9819	3.04e-35	17	44273653	Imputed	G	0.129449	17	43663579		Intergenic
rs151194399	cg22968622	30.9806	3.05e-35	17	44346690	Imputed	G	0.1295	17	43663579		Intergenic
rs142154964	cg22968622	30.9373	3.38e-35	17	44317210	Imputed	A	0.137597	17	43663579		Intergenic
rs140169141	cg22968622	30.8873	3.82e-35	17	44327482	Imputed	A	0.145771	17	43663579		Intergenic
rs116948608	cg22968622	30.8588	4.09e-35	17	44346407	Imputed	C	0.129315	17	43663579		Intergenic
rs117446488	cg22968622	30.855	4.13e-35	17	44346405	Imputed	T	0.129367	17	43663579		Intergenic
rs117996311	cg22968622	30.8535	4.14e-35	17	44346418	Imputed	T	0.129372	17	43663579		Intergenic
rs117655396	cg22968622	30.8201	4.49e-35	17	44351298	Imputed	A	0.129792	17	43663579		Intergenic
rs112969530	cg22968622	30.8191	4.5e-35	17	44339003	Imputed	T	0.129805	17	43663579		Intergenic
rs146336390	cg22968622	30.8015	4.7e-35	17	44346666	Imputed	A	0.129831	17	43663579		Intergenic
chr17:44203806:I	cg22968622	30.7981	4.74e-35	17	44203806	Imputed	CA	0.141708	17	43663579		Intergenic
rs147431626	cg22968622	30.3519	1.41e-34	17	44335635	Imputed	A	0.128396	17	43663579		Intergenic
rs4299050	cg12856521	30.3056	1.58e-34	13	44542878	Imputed	G	0.168455	11	46389249	DGKZ;DGKZ;DGKZ;DGKZ	Body;Body;Body;Body
chr17:44247538:I	cg22968622	30.2772	1.69e-34	17	44247538	Imputed	CA	0.135034	17	43663579		Intergenic
rs1530488	cg12856521	30.2632	1.75e-34	13	44543024	Imputed	A	0.168539	11	46389249	DGKZ;DGKZ;DGKZ;DGKZ	Body;Body;Body;Body
rs1530489	cg12856521	30.2632	1.75e-34	13	44543013	Genotyped	C	0.168539	11	46389249	DGKZ;DGKZ;DGKZ;DGKZ	Body;Body;Body;Body
rs1530487	cg12856521	30.258	1.77e-34	13	44543106	Imputed	G	0.168556	11	46389249	DGKZ;DGKZ;DGKZ;DGKZ	Body;Body;Body;Body
rs61960030	cg12856521	30.1932	2.08e-34	13	44545596	Imputed	C	0.169404	11	46389249	DGKZ;DGKZ;DGKZ;DGKZ	Body;Body;Body;Body
rs116556832	cg12856521	30.1826	2.14e-34	13	44544401	Imputed	T	0.168758	11	46389249	DGKZ;DGKZ;DGKZ;DGKZ	Body;Body;Body;Body
rs117724427	cg22968622	30.1798	2.15e-34	17	44217267	Imputed	T	0.119522	17	43663579		Intergenic
rs113399414	cg12856521	30.1641	2.24e-34	13	44544665	Imputed	T	0.1688	11	46389249	DGKZ;DGKZ;DGKZ;DGKZ	Body;Body;Body;Body
rs3794434	cg12856521	30.1414	2.36e-34	13	44544944	Imputed	G	0.168848	11	46389249	DGKZ;DGKZ;DGKZ;DGKZ	Body;Body;Body;Body
rs3794438	cg12856521	30.1229	2.48e-34	13	44545226	Imputed	C	0.168888	11	46389249	DGKZ;DGKZ;DGKZ;DGKZ	Body;Body;Body;Body
rs112243618	cg22968622	30.0601	2.89e-34	17	44355284	Imputed	A	0.117462	17	43663579		Intergenic
chr17:44303606:D	cg22968622	29.9979	3.37e-34	17	44303606	Imputed	A	0.140506	17	43663579		Intergenic
rs117113999	cg12856521	29.9242	4.05e-34	13	44545482	Imputed	A	0.169994	11	46389249	DGKZ;DGKZ;DGKZ;DGKZ	Body;Body;Body;Body
rs112226313	cg22968622	29.8894	4.42e-34	17	44335941	Imputed	C	0.115904	17	43663579		Intergenic
rs118155136	cg22968622	29.8238	5.2e-34	17	44331353	Imputed	G	0.115327	17	43663579		Intergenic
rs117430778	cg22968622	29.8208	5.24e-34	17	44339712	Imputed	G	0.115309	17	43663579		Intergenic
rs118172952	cg22968622	29.8209	5.24e-34	17	44353222	Imputed	G	0.117812	17	43663579		Intergenic
rs149437856	cg22968622	29.816	5.3e-34	17	44331411	Imputed	T	0.115236	17	43663579		Intergenic
chr17:44342461:I	cg22968622	29.7912	5.64e-34	17	44342461	Imputed	AGCTT	0.115916	17	43663579		Intergenic
rs79303124	cg22968622	29.7812	5.78e-34	17	44342646	Imputed	G	0.115978	17	43663579		Intergenic
rs150449356	cg22968622	29.7645	6.03e-34	17	44336273	Imputed	G	0.116895	17	43663579		Intergenic
rs117458517	cg22968622	29.6859	7.34e-34	17	44217020	Imputed	C	0.120208	17	43663579		Intergenic
chr17:44342482:D	cg22968622	29.6716	7.6e-34	17	44342482	Imputed	G	0.114187	17	43663579		Intergenic
rs8000271	cg12856521	29.6626	7.78e-34	13	44550398	Imputed	A	0.169584	11	46389249	DGKZ;DGKZ;DGKZ;DGKZ	Body;Body;Body;Body
rs117077047	cg22968622	29.5931	9.26e-34	17	44339607	Imputed	T	0.116292	17	43663579		Intergenic
rs117483353	cg22968622	29.5931	9.26e-34	17	44339608	Imputed	G	0.116292	17	43663579		Intergenic
chr17:44213547:D	cg22968622	29.5925	9.27e-34	17	44213547	Imputed	A	0.120649	17	43663579		Intergenic
rs4942261	cg12856521	29.5848	9.45e-34	13	44551078	Imputed	A	0.169674	11	46389249	DGKZ;DGKZ;DGKZ;DGKZ	Body;Body;Body;Body
rs139192278	cg22968622	29.5818	9.52e-34	17	44332234	Imputed	G	0.112601	17	43663579		Intergenic
rs187455887	cg22968622	29.5714	9.78e-34	17	44332715	Imputed	C	0.116331	17	43663579		Intergenic
rs144550251	cg22968622	29.5597	1.01e-33	17	44334870	Imputed	T	0.117034	17	43663579		Intergenic
rs117164086	cg22968622	29.5388	1.06e-33	17	44216817	Imputed	T	0.121584	17	43663579		Intergenic
rs7325401	cg12856521	29.5273	1.09e-33	13	44551531	Imputed	A	0.169742	11	46389249	DGKZ;DGKZ;DGKZ;DGKZ	Body;Body;Body;Body
rs111574666	cg22968622	29.5241	1.1e-33	17	44339651	Imputed	C	0.110497	17	43663579		Intergenic
rs112211082	cg22968622	29.4848	1.22e-33	17	44213164	Imputed	A	0.121213	17	43663579		Intergenic
rs112491575	cg22968622	29.4848	1.22e-33	17	44213187	Imputed	T	0.121213	17	43663579		Intergenic
rs117487942	cg22968622	29.4495	1.33e-33	17	44347109	Imputed	G	0.123393	17	43663579		Intergenic
rs140824659	cg22968622	29.4495	1.33e-33	17	44347097	Imputed	G	0.123393	17	43663579		Intergenic
rs111766658	cg22968622	29.3725	1.61e-33	17	44339090	Imputed	T	0.116607	17	43663579		Intergenic
rs116886557	cg22968622	29.3607	1.66e-33	17	44214518	Imputed	T	0.121792	17	43663579		Intergenic
rs117618215	cg22968622	29.3607	1.66e-33	17	44214386	Imputed	G	0.121792	17	43663579		Intergenic
rs117750996	cg22968622	29.3607	1.66e-33	17	44218017	Imputed	G	0.121792	17	43663579		Intergenic
rs117043708	cg22968622	29.3543	1.69e-33	17	44214888	Imputed	C	0.121815	17	43663579		Intergenic
rs117446131	cg22968622	29.3543	1.69e-33	17	44215896	Imputed	T	0.121815	17	43663579		Intergenic
chr17:44338640:D	cg22968622	29.346	1.72e-33	17	44338640	Imputed	T	0.116635	17	43663579		Intergenic
chr17:44341868:D	cg22968622	29.346	1.72e-33	17	44341868	Imputed	C	0.116635	17	43663579		Intergenic
rs111332689	cg22968622	29.346	1.72e-33	17	44339174	Imputed	T	0.116635	17	43663579		Intergenic
rs112258610	cg22968622	29.346	1.72e-33	17	44342607	Imputed	C	0.116635	17	43663579		Intergenic
rs112788676	cg22968622	29.346	1.72e-33	17	44339153	Imputed	G	0.116635	17	43663579		Intergenic
rs113622320	cg22968622	29.346	1.72e-33	17	44338404	Imputed	A	0.116635	17	43663579		Intergenic
rs117292647	cg22968622	29.346	1.72e-33	17	44341609	Imputed	C	0.116635	17	43663579		Intergenic
rs117400315	cg22968622	29.346	1.72e-33	17	44342404	Imputed	C	0.116635	17	43663579		Intergenic
rs117660154	cg22968622	29.346	1.72e-33	17	44340021	Imputed	T	0.116635	17	43663579		Intergenic
rs117671617	cg22968622	29.346	1.72e-33	17	44339513	Imputed	C	0.116635	17	43663579		Intergenic
rs117763129	cg22968622	29.346	1.72e-33	17	44341627	Imputed	T	0.116635	17	43663579		Intergenic
rs2429440	cg22968622	29.346	1.72e-33	17	44342563	Imputed	G	0.116635	17	43663579		Intergenic
rs2668713	cg22968622	29.346	1.72e-33	17	44342513	Imputed	C	0.116635	17	43663579		Intergenic
rs77066823	cg22968622	29.346	1.72e-33	17	44342628	Imputed	G	0.116635	17	43663579		Intergenic
rs116967196	cg22968622	29.344	1.73e-33	17	44341870	Imputed	C	0.116602	17	43663579		Intergenic
chr17:44339109:D	cg22968622	29.3347	1.77e-33	17	44339109	Imputed	A	0.113823	17	43663579		Intergenic
rs113869645	cg22968622	29.327	1.81e-33	17	44355376	Imputed	A	0.142412	17	43663579		Intergenic
rs147801261	cg22968622	29.2395	2.26e-33	17	44332359	Imputed	A	0.1115	17	43663579		Intergenic
rs116896619	cg22968622	29.2246	2.34e-33	17	44259539	Imputed	C	0.120404	17	43663579		Intergenic
rs117628467	cg22968622	29.2246	2.34e-33	17	44259519	Imputed	G	0.120404	17	43663579		Intergenic
rs150852569	cg22968622	29.2019	2.48e-33	17	44334379	Imputed	T	0.111079	17	43663579		Intergenic
rs191429557	cg22968622	29.1233	3.03e-33	17	44185431	Imputed	C	0.140528	17	43663579		Intergenic
rs149567363	cg22968622	29.119	3.06e-33	17	44334707	Imputed	A	0.111753	17	43663579		Intergenic
rs141633411	cg22968622	29.0958	3.25e-33	17	44323425	Imputed	T	0.141404	17	43663579		Intergenic
rs149258611	cg22968622	29.0705	3.47e-33	17	44336943	Imputed	T	0.111531	17	43663579		Intergenic
rs115236446	cg12093005	-28.9546	4.66e-33	6	30063674	Imputed	C	0.0634797	12	133086067	FBRSL1	Body
rs191523477	cg22968622	28.938	4.86e-33	17	44341239	Imputed	G	0.118865	17	43663579		Intergenic
rs117282525	cg22968622	28.8227	6.53e-33	17	44282472	Imputed	C	0.12803	17	43663579		Intergenic
rs190532582	cg22968622	28.7984	6.95e-33	17	44335585	Imputed	T	0.108878	17	43663579		Intergenic
rs117024587	cg22968622	28.7805	7.28e-33	17	44218044	Imputed	T	0.118181	17	43663579		Intergenic
rs146924762	cg22968622	28.6939	9.09e-33	17	44332439	Imputed	C	0.113191	17	43663579		Intergenic
rs142451846	cg22968622	28.667	9.74e-33	17	44245876	Imputed	G	0.141084	17	43663579		Intergenic
rs150929791	cg22968622	28.6618	9.87e-33	17	44285498	Imputed	T	0.128775	17	43663579		Intergenic
rs117385457	cg22968622	28.6166	1.11e-32	17	44339966	Imputed	A	0.109225	17	43663579		Intergenic
rs146676596	cg22968622	28.5539	1.3e-32	17	44281964	Imputed	C	0.12886	17	43663579		Intergenic
chr17:44249911:I	cg22968622	28.516	1.44e-32	17	44249911	Imputed	TA	0.144511	17	43663579		Intergenic
rs117311245	cg22968622	28.487	1.55e-32	17	44326712	Imputed	C	0.11209	17	43663579		Intergenic
chr17:44331803:I	cg22968622	28.4752	1.6e-32	17	44331803	Imputed	ATTTT	0.124438	17	43663579		Intergenic
rs145824513	cg22968622	28.4536	1.69e-32	17	44297896	Imputed	C	0.129281	17	43663579		Intergenic
rs145211808	cg22968622	28.3513	2.2e-32	17	44349234	Imputed	T	0.128136	17	43663579		Intergenic
rs117451956	cg22968622	28.3063	2.48e-32	17	44316280	Imputed	C	0.130288	17	43663579		Intergenic
rs116969669	cg22968622	28.2976	2.53e-32	17	44343930	Imputed	G	0.139483	17	43663579		Intergenic
rs150462240	cg22968622	28.2173	3.12e-32	17	44306216	Imputed	C	0.15038	17	43663579		Intergenic
rs117354059	cg22968622	28.2138	3.15e-32	17	44343775	Imputed	A	0.114608	17	43663579		Intergenic
chr17:44173504:I	cg22968622	28.1684	3.55e-32	17	44173504	Imputed	TC	0.107743	17	43663579		Intergenic
rs117503304	cg22968622	28.1612	3.62e-32	17	44218138	Imputed	T	0.116793	17	43663579		Intergenic
rs139009276	cg22968622	28.1134	4.1e-32	17	44352500	Imputed	T	0.129868	17	43663579		Intergenic
rs146215593	cg22968622	28.1014	4.23e-32	17	44336962	Imputed	A	0.105983	17	43663579		Intergenic
rs111912558	cg22968622	28.05	4.84e-32	17	44356694	Imputed	C	0.130024	17	43663579		Intergenic
chr17:44335895:D	cg22968622	28.0132	5.33e-32	17	44335895	Imputed	C	0.106494	17	43663579		Intergenic
chr17:44325782:D	cg22968622	27.925	6.72e-32	17	44325782	Imputed	C	0.138781	17	43663579		Intergenic
rs138741653	cg22968622	27.925	6.72e-32	17	44325960	Imputed	C	0.138781	17	43663579		Intergenic
rs143628920	cg22968622	27.925	6.72e-32	17	44326063	Imputed	G	0.138781	17	43663579		Intergenic
rs117343696	cg22968622	27.9107	6.98e-32	17	44270831	Imputed	A	0.122852	17	43663579		Intergenic
chr17:44168295:D	cg22968622	27.8296	8.64e-32	17	44168295	Imputed	C	0.141382	17	43663579		Intergenic
rs117897298	cg22968622	27.7775	9.92e-32	17	44315987	Imputed	A	0.118169	17	43663579		Intergenic
rs144049597	cg22968622	27.7649	1.02e-31	17	44360760	Imputed	T	0.11867	17	43663579		Intergenic
rs191247549	cg22968622	27.7617	1.03e-31	17	44326105	Imputed	C	0.144097	17	43663579		Intergenic
rs112734292	cg22968622	27.7407	1.09e-31	17	44338735	Imputed	T	0.14132	17	43663579		Intergenic
rs117093439	cg22968622	27.7249	1.14e-31	17	44345080	Imputed	T	0.114253	17	43663579		Intergenic
rs141454986	cg22968622	27.7075	1.19e-31	17	44298279	Imputed	T	0.13982	17	43663579		Intergenic
rs190796367	cg22968622	27.7078	1.19e-31	17	44333293	Imputed	G	0.12014	17	43663579		Intergenic
rs3794432	cg12856521	27.7064	1.2e-31	13	44544587	Imputed	T	0.173478	11	46389249	DGKZ;DGKZ;DGKZ;DGKZ	Body;Body;Body;Body
rs112069840	cg22968622	27.5664	1.73e-31	17	44338694	Imputed	A	0.144271	17	43663579		Intergenic
rs113402416	cg22968622	27.5507	1.81e-31	17	44189910	Imputed	G	0.126163	17	43663579		Intergenic
rs111604810	cg22968622	27.4648	2.27e-31	17	44357869	Imputed	C	0.127395	17	43663579		Intergenic
chr17:44309250:I	cg22968622	27.3106	3.43e-31	17	44309250	Imputed	TA	0.110225	17	43663579		Intergenic
rs149531611	cg22968622	27.3066	3.47e-31	17	44309298	Imputed	A	0.110264	17	43663579		Intergenic
rs183141429	cg22968622	27.3043	3.49e-31	17	44229960	Imputed	A	0.122653	17	43663579		Intergenic
rs117605661	cg22968622	27.1531	5.24e-31	17	44334419	Imputed	T	0.146355	17	43663579		Intergenic
rs117628202	cg22968622	27.1386	5.45e-31	17	44269964	Imputed	A	0.140461	17	43663579		Intergenic
rs142135678	cg22968622	27.1361	5.49e-31	17	44335865	Imputed	G	0.113344	17	43663579		Intergenic
rs115355499	cg12093005	-27.126	5.64e-31	6	29659255	Imputed	A	0.0703884	12	133086067	FBRSL1	Body
rs113343439	cg22968622	27.1189	5.75e-31	17	44314217	Imputed	G	0.12499	17	43663579		Intergenic
rs116073320	cg12093005	-27.0662	6.63e-31	6	29660816	Imputed	A	0.070073	12	133086067	FBRSL1	Body
rs113138968	cg22968622	27.0342	7.22e-31	17	44314261	Imputed	T	0.124118	17	43663579		Intergenic
chr17:44263723:I	cg22968622	27.0277	7.35e-31	17	44263723	Imputed	CT	0.110939	17	43663579		Intergenic
rs148435360	cg22968622	26.9758	8.46e-31	17	44310014	Imputed	G	0.104601	17	43663579		Intergenic
chr17:44263728:D	cg22968622	26.93	9.57e-31	17	44263728	Imputed	G	0.107463	17	43663579		Intergenic
rs111535660	cg22968622	26.9293	9.59e-31	17	44314148	Imputed	A	0.122834	17	43663579		Intergenic
rs146334113	cg22968622	26.9102	1.01e-30	17	44316288	Imputed	T	0.114596	17	43663579		Intergenic
rs144416125	cg22968622	26.8257	1.27e-30	17	44296523	Imputed	A	0.130152	17	43663579		Intergenic
rs149635915	cg22968622	26.8257	1.27e-30	17	44296522	Imputed	C	0.130152	17	43663579		Intergenic
rs143304293	cg22968622	26.7911	1.4e-30	17	44313610	Imputed	T	0.120011	17	43663579		Intergenic
rs140507550	cg22968622	26.7884	1.41e-30	17	44352352	Imputed	A	0.119393	17	43663579		Intergenic
rs78381082	cg22968622	26.7786	1.44e-30	17	44182983	Imputed	G	0.109979	17	43663579		Intergenic
rs147864336	cg22968622	26.7518	1.55e-30	17	44359412	Imputed	C	0.121303	17	43663579		Intergenic
rs140451946	cg22968622	26.7381	1.61e-30	17	44359440	Imputed	C	0.121646	17	43663579		Intergenic
chr17:44358347:D	cg22968622	26.6822	1.88e-30	17	44358347	Imputed	T	0.121723	17	43663579		Intergenic
rs117998506	cg22968622	26.6147	2.26e-30	17	44358107	Imputed	T	0.125906	17	43663579		Intergenic
rs118120078	cg22968622	26.6009	2.35e-30	17	44358088	Imputed	T	0.125163	17	43663579		Intergenic
rs148803980	cg22968622	26.5941	2.39e-30	17	44366774	Imputed	A	0.121051	17	43663579		Intergenic
rs117590464	cg22968622	26.5801	2.48e-30	17	44358109	Imputed	T	0.125787	17	43663579		Intergenic
rs139077859	cg22968622	26.5683	2.56e-30	17	44335579	Imputed	A	0.111161	17	43663579		Intergenic
rs112480703	cg22968622	26.4999	3.09e-30	17	44189799	Imputed	C	0.14132	17	43663579		Intergenic
chr17:44173878:I	cg22968622	26.4904	3.17e-30	17	44173878	Imputed	GT	0.121619	17	43663579		Intergenic
rs138719341	cg22968622	26.482	3.25e-30	17	44359600	Imputed	T	0.122131	17	43663579		Intergenic
rs148121125	cg22968622	26.4789	3.28e-30	17	44336594	Imputed	G	0.158109	17	43663579		Intergenic
rs117013619	cg22968622	26.4015	4.05e-30	17	44252098	Imputed	T	0.140899	17	43663579		Intergenic
rs112960425	cg22968622	26.3815	4.28e-30	17	44358146	Imputed	A	0.126982	17	43663579		Intergenic
rs117521858	cg22968622	26.3631	4.51e-30	17	44351600	Imputed	T	0.126544	17	43663579		Intergenic
chr17:44367294:D	cg22968622	26.3611	4.53e-30	17	44367294	Imputed	T	0.119882	17	43663579		Intergenic
rs117471573	cg22968622	26.2517	6.13e-30	17	44205690	Imputed	T	0.140685	17	43663579		Intergenic
rs117338824	cg22968622	26.1799	7.47e-30	17	44358015	Imputed	C	0.123628	17	43663579		Intergenic
rs112293064	cg22968622	26.1724	7.63e-30	17	44343192	Imputed	A	0.117388	17	43663579		Intergenic
rs145141330	cg17117718	26.1639	7.81e-30	17	44318295	Imputed	G	0.119569	17	43663208		Intergenic
rs144085360	cg22968622	26.0069	1.21e-29	17	44243407	Imputed	A	0.133898	17	43663579		Intergenic
chr17:44357426:I	cg22968622	25.7464	2.5e-29	17	44357426	Imputed	GT	0.11272	17	43663579		Intergenic
rs143463837	cg17117718	25.668	3.12e-29	17	44281821	Imputed	C	0.128973	17	43663208		Intergenic
chr17:44246689:D	cg17117718	25.5905	3.88e-29	17	44246689	Imputed	G	0.127621	17	43663208		Intergenic
rs149753849	cg17117718	25.5131	4.83e-29	17	44316509	Imputed	C	0.12359	17	43663208		Intergenic
rs117355890	cg17117718	25.5109	4.86e-29	17	44318471	Imputed	T	0.123719	17	43663208		Intergenic
chr17:44365486:I	cg17117718	25.3977	6.7e-29	17	44365486	Imputed	ACT	0.127152	17	43663208		Intergenic
rs111920741	cg17117718	25.3897	6.86e-29	17	44333412	Imputed	A	0.126395	17	43663208		Intergenic
rs143984253	cg17117718	25.3722	7.21e-29	17	44311529	Imputed	C	0.12691	17	43663208		Intergenic
rs116956554	cg22968622	25.3487	7.7e-29	17	44699851	Imputed	A	0.134156	17	43663579		Intergenic
rs188911488	cg17117718	25.3424	7.84e-29	17	44314686	Imputed	C	0.124545	17	43663208		Intergenic
rs144834741	cg17117718	25.3078	8.65e-29	17	44311107	Imputed	C	0.12603	17	43663208		Intergenic
rs113343751	cg17117718	25.2916	9.06e-29	17	44333532	Imputed	G	0.126449	17	43663208		Intergenic
rs151267808	cg12093005	-25.2864	9.2e-29	6	29850720	Imputed	C	0.0671404	12	133086067	FBRSL1	Body
rs55790833	cg17117718	25.2772	9.44e-29	17	44315677	Imputed	A	0.122142	17	43663208		Intergenic
rs117037470	cg17117718	25.2348	1.07e-28	17	44252461	Imputed	G	0.125302	17	43663208		Intergenic
rs118045117	cg17117718	25.2348	1.07e-28	17	44252468	Imputed	A	0.125302	17	43663208		Intergenic
rs145311172	cg17117718	25.2003	1.18e-28	17	44318665	Imputed	C	0.12678	17	43663208		Intergenic
rs2696673	cg17117718	25.2003	1.18e-28	17	44315803	Imputed	C	0.126778	17	43663208		Intergenic
rs12431168	cg12856521	25.1958	1.19e-28	13	44542583	Imputed	G	0.187467	11	46389249	DGKZ;DGKZ;DGKZ;DGKZ	Body;Body;Body;Body
rs139611916	cg17117718	25.1802	1.24e-28	17	44316491	Imputed	C	0.125056	17	43663208		Intergenic
rs117174664	cg17117718	25.1717	1.28e-28	17	44262758	Imputed	T	0.130556	17	43663208		Intergenic
rs117667559	cg17117718	25.1579	1.33e-28	17	44253275	Imputed	C	0.125511	17	43663208		Intergenic
rs144863804	cg22968622	25.1491	1.36e-28	17	44313627	Imputed	A	0.115417	17	43663579		Intergenic
rs117563597	cg17117718	25.117	1.49e-28	17	44253951	Imputed	A	0.125152	17	43663208		Intergenic
rs117044344	cg17117718	25.1109	1.52e-28	17	44256053	Imputed	A	0.130826	17	43663208		Intergenic
rs118190055	cg17117718	25.1031	1.55e-28	17	44254291	Imputed	T	0.131537	17	43663208		Intergenic
rs145343506	cg22968622	25.1047	1.55e-28	17	44298209	Imputed	C	0.161378	17	43663579		Intergenic
rs117347612	cg17117718	25.0933	1.6e-28	17	44256296	Imputed	A	0.130899	17	43663208		Intergenic
rs78339062	cg12856521	25.0824	1.65e-28	13	44544182	Imputed	C	0.180803	11	46389249	DGKZ;DGKZ;DGKZ;DGKZ	Body;Body;Body;Body
rs150507834	cg17117718	25.0797	1.66e-28	17	44338966	Imputed	C	0.127972	17	43663208		Intergenic
rs75330746	cg17117718	25.0801	1.66e-28	17	44182955	Imputed	T	0.129607	17	43663208		Intergenic
rs75183956	cg17117718	25.0783	1.67e-28	17	44182956	Imputed	G	0.129612	17	43663208		Intergenic
rs117632628	cg17117718	25.0758	1.68e-28	17	44256655	Imputed	A	0.130951	17	43663208		Intergenic
rs111952249	cg17117718	24.9968	2.11e-28	17	44357491	Imputed	A	0.129921	17	43663208		Intergenic
rs143852331	cg17117718	24.9579	2.35e-28	17	44356394	Imputed	G	0.128781	17	43663208		Intergenic
rs146104393	cg17117718	24.9476	2.43e-28	17	44356410	Imputed	C	0.128771	17	43663208		Intergenic
chr17:44284962:I	cg17117718	24.944	2.45e-28	17	44284962	Imputed	AG	0.129596	17	43663208		Intergenic
rs111673945	cg17117718	24.9384	2.49e-28	17	44333423	Imputed	T	0.129725	17	43663208		Intergenic
rs141211409	cg17117718	24.9386	2.49e-28	17	44314522	Imputed	G	0.1279	17	43663208		Intergenic
rs148520777	cg17117718	24.911	2.69e-28	17	44333121	Imputed	A	0.128219	17	43663208		Intergenic
rs149352374	cg22968622	24.8932	2.84e-28	17	44318594	Imputed	G	0.11109	17	43663579		Intergenic
rs150290194	cg22968622	24.8725	3.01e-28	17	44282776	Imputed	A	0.124056	17	43663579		Intergenic
rs140463727	cg22968622	24.8647	3.08e-28	17	44192618	Imputed	G	0.123534	17	43663579		Intergenic
rs142704107	cg17117718	24.8375	3.33e-28	17	44311668	Imputed	T	0.130541	17	43663208		Intergenic
rs150592114	cg17117718	24.8209	3.49e-28	17	44333331	Imputed	G	0.129737	17	43663208		Intergenic
rs138971419	cg17117718	24.8142	3.56e-28	17	44297433	Imputed	T	0.130058	17	43663208		Intergenic
rs112884673	cg22968622	24.7916	3.8e-28	17	44369518	Imputed	A	0.114013	17	43663579		Intergenic
rs116911373	cg17117718	24.7908	3.81e-28	17	44235765	Imputed	A	0.130118	17	43663208		Intergenic
rs191808086	cg17117718	24.7817	3.91e-28	17	44307254	Imputed	G	0.128652	17	43663208		Intergenic
rs139489216	cg17117718	24.7165	4.73e-28	17	44338967	Imputed	C	0.130034	17	43663208		Intergenic
rs9567335	cg12856521	24.7144	4.76e-28	13	44542504	Imputed	G	0.175287	11	46389249	DGKZ;DGKZ;DGKZ;DGKZ	Body;Body;Body;Body
rs117265605	cg22968622	24.7089	4.83e-28	17	44281452	Imputed	G	0.143298	17	43663579		Intergenic
rs146676063	cg17117718	24.7015	4.94e-28	17	44335274	Imputed	A	0.131539	17	43663208		Intergenic
rs146855054	cg17117718	24.6591	5.58e-28	17	44188764	Imputed	C	0.130546	17	43663208		Intergenic
rs111250307	cg17117718	24.6159	6.33e-28	17	44357304	Imputed	T	0.129955	17	43663208		Intergenic
rs139321758	cg22968622	24.5917	6.79e-28	17	44348634	Imputed	C	0.128826	17	43663579		Intergenic
rs117529362	cg17117718	24.5883	6.86e-28	17	44172773	Imputed	T	0.131091	17	43663208		Intergenic
rs117230199	cg22968622	24.5824	6.98e-28	17	44272266	Imputed	G	0.151266	17	43663579		Intergenic
rs112994064	cg17117718	24.5466	7.74e-28	17	44357517	Imputed	C	0.131226	17	43663208		Intergenic
rs111471804	cg17117718	24.5215	8.33e-28	17	44335752	Imputed	C	0.131082	17	43663208		Intergenic
rs111676341	cg17117718	24.5152	8.49e-28	17	44183403	Imputed	G	0.131843	17	43663208		Intergenic
rs117938360	cg17117718	24.5136	8.53e-28	17	44269510	Imputed	G	0.132022	17	43663208		Intergenic
rs116853517	cg17117718	24.5094	8.63e-28	17	44182917	Imputed	G	0.132041	17	43663208		Intergenic
rs113986870	cg17117718	24.4935	9.04e-28	17	44355683	Imputed	A	0.131843	17	43663208		Intergenic
rs113613291	cg17117718	24.4904	9.12e-28	17	44344239	Imputed	T	0.126584	17	43663208		Intergenic
rs117101410	cg17117718	24.4476	1.03e-27	17	44311484	Imputed	A	0.132191	17	43663208		Intergenic
rs111915242	cg17117718	24.444	1.04e-27	17	44333568	Imputed	C	0.131318	17	43663208		Intergenic
rs113314058	cg17117718	24.427	1.1e-27	17	44356436	Imputed	C	0.130827	17	43663208		Intergenic
rs117447352	cg22968622	24.4199	1.12e-27	17	44331297	Imputed	T	0.161135	17	43663579		Intergenic
rs140535129	cg17117718	24.4181	1.13e-27	17	44336237	Imputed	T	0.13517	17	43663208		Intergenic
rs141092216	cg17117718	24.3964	1.2e-27	17	44332429	Imputed	T	0.131494	17	43663208		Intergenic
rs117163819	cg17117718	24.3875	1.23e-27	17	44230269	Imputed	C	0.129978	17	43663208		Intergenic
rs188918054	cg17117718	24.3841	1.25e-27	17	44338536	Imputed	C	0.137855	17	43663208		Intergenic
rs113748556	cg17117718	24.3641	1.32e-27	17	44345434	Imputed	G	0.132266	17	43663208		Intergenic
rs113159473	cg17117718	24.3589	1.34e-27	17	44355113	Imputed	T	0.130996	17	43663208		Intergenic
rs144325060	cg17117718	24.3563	1.35e-27	17	44296801	Imputed	C	0.126839	17	43663208		Intergenic
rs117964243	cg17117718	24.3521	1.37e-27	17	44257788	Imputed	C	0.131511	17	43663208		Intergenic
rs142077020	cg17117718	24.3468	1.39e-27	17	44332970	Imputed	G	0.132277	17	43663208		Intergenic
rs141173837	cg22968622	24.3407	1.41e-27	17	44312854	Imputed	T	0.123114	17	43663579		Intergenic
rs145067525	cg17117718	24.3346	1.44e-27	17	44179723	Imputed	C	0.132895	17	43663208		Intergenic
rs113727582	cg17117718	24.3288	1.46e-27	17	44364958	Imputed	A	0.131376	17	43663208		Intergenic
rs145612305	cg17117718	24.3266	1.47e-27	17	44242637	Imputed	T	0.130582	17	43663208		Intergenic
rs143995284	cg17117718	24.3157	1.52e-27	17	44297236	Imputed	A	0.13281	17	43663208		Intergenic
rs62060952	cg17117718	24.3121	1.54e-27	17	44273398	Imputed	T	0.132921	17	43663208		Intergenic
chr17:44277168:D	cg17117718	24.3068	1.56e-27	17	44277168	Imputed	A	0.132872	17	43663208		Intergenic
rs117871922	cg22968622	24.3014	1.59e-27	17	44312911	Imputed	T	0.124125	17	43663579		Intergenic
rs113338573	cg17117718	24.2955	1.61e-27	17	44357677	Imputed	A	0.137197	17	43663208		Intergenic
rs9594970	cg19169023	-24.2875	1.65e-27	13	44106429	Imputed	G	0.263236	15	41853346	TYRO3	Body
chr17:44225958:I	cg17117718	24.2823	1.68e-27	17	44225958	Imputed	TC	0.132961	17	43663208		Intergenic
rs148292931	cg17117718	24.2752	1.71e-27	17	44236108	Imputed	C	0.13318	17	43663208		Intergenic
chr17:44267801:I	cg17117718	24.2661	1.76e-27	17	44267801	Imputed	AT	0.133135	17	43663208		Intergenic
rs150278591	cg17117718	24.2601	1.79e-27	17	44242759	Imputed	T	0.133225	17	43663208		Intergenic
rs74344946	cg19169023	-24.2534	1.83e-27	13	44080098	Imputed	G	0.261374	15	41853346	TYRO3	Body
rs151297800	cg22968622	24.2434	1.88e-27	17	44325475	Imputed	G	0.10841	17	43663579		Intergenic
rs117120828	cg22968622	24.2399	1.9e-27	17	44283571	Imputed	T	0.124397	17	43663579		Intergenic
rs143768442	cg22968622	24.2385	1.91e-27	17	44327712	Imputed	T	0.159228	17	43663579		Intergenic
rs9590770	cg19169023	-24.2387	1.91e-27	13	44102525	Imputed	G	0.261166	15	41853346	TYRO3	Body
rs139055930	cg22968622	24.223	2e-27	17	44263082	Imputed	T	0.119449	17	43663579		Intergenic
chr17:44243351:I	cg17117718	24.2197	2.02e-27	17	44243351	Imputed	TCG	0.133254	17	43663208		Intergenic
chr17:44243354:I	cg17117718	24.2197	2.02e-27	17	44243354	Imputed	AG	0.133254	17	43663208		Intergenic
rs117917171	cg17117718	24.216	2.04e-27	17	44228619	Imputed	T	0.133208	17	43663208		Intergenic
rs112465334	cg17117718	24.2139	2.05e-27	17	44260933	Imputed	G	0.1334	17	43663208		Intergenic
rs117200899	cg17117718	24.2149	2.05e-27	17	44241797	Imputed	C	0.13341	17	43663208		Intergenic
rs117589461	cg17117718	24.2098	2.08e-27	17	44243868	Imputed	T	0.133428	17	43663208		Intergenic
rs117859764	cg17117718	24.2098	2.08e-27	17	44243870	Imputed	C	0.133428	17	43663208		Intergenic
rs117937465	cg17117718	24.2098	2.08e-27	17	44243863	Imputed	T	0.133428	17	43663208		Intergenic
rs117003423	cg17117718	24.207	2.09e-27	17	44236209	Imputed	A	0.133433	17	43663208		Intergenic
chr17:44315946:D	cg17117718	24.2068	2.1e-27	17	44315946	Imputed	T	0.116705	17	43663208		Intergenic
rs117190688	cg17117718	24.1981	2.15e-27	17	44240497	Imputed	C	0.133466	17	43663208		Intergenic
rs117299592	cg17117718	24.1981	2.15e-27	17	44244639	Imputed	G	0.133466	17	43663208		Intergenic
rs117601640	cg17117718	24.1981	2.15e-27	17	44240797	Imputed	C	0.133466	17	43663208		Intergenic
chr17:44241487:D	cg17117718	24.1961	2.16e-27	17	44241487	Imputed	C	0.131831	17	43663208		Intergenic
rs116876337	cg17117718	24.1971	2.16e-27	17	44230166	Imputed	A	0.133455	17	43663208		Intergenic
rs116983424	cg17117718	24.197	2.16e-27	17	44240850	Imputed	C	0.133472	17	43663208		Intergenic
rs117797582	cg17117718	24.1965	2.16e-27	17	44288284	Imputed	A	0.133249	17	43663208		Intergenic
rs117739649	cg17117718	24.1929	2.18e-27	17	44235893	Imputed	T	0.133485	17	43663208		Intergenic
rs118044923	cg17117718	24.1933	2.18e-27	17	44229415	Imputed	C	0.133428	17	43663208		Intergenic
rs146483635	cg17117718	24.1939	2.18e-27	17	44281633	Imputed	A	0.133483	17	43663208		Intergenic
rs149955234	cg17117718	24.1934	2.18e-27	17	44183790	Imputed	A	0.133457	17	43663208		Intergenic
chr11:108577357:I	cg23247274	24.1915	2.19e-27	11	108577357	Imputed	AT	0.134938	13	21750649	MRP63;MRP63;SKA3;SKA3;SKA3;SKA3	1stExon;5'UTR;5'UTR;1stExon;5'UTR;1stExon
rs118029804	cg17117718	24.1912	2.19e-27	17	44245171	Imputed	T	0.133489	17	43663208		Intergenic
rs118108313	cg17117718	24.1912	2.19e-27	17	44244896	Imputed	G	0.133489	17	43663208		Intergenic
rs112254607	cg17117718	24.1906	2.2e-27	17	44357392	Imputed	A	0.133577	17	43663208		Intergenic
rs116934879	cg17117718	24.1884	2.21e-27	17	44357885	Imputed	G	0.133618	17	43663208		Intergenic
rs117817544	cg17117718	24.1894	2.21e-27	17	44347561	Imputed	C	0.133506	17	43663208		Intergenic
rs118042866	cg17117718	24.1894	2.21e-27	17	44347557	Imputed	A	0.133506	17	43663208		Intergenic
rs117241638	cg17117718	24.1872	2.22e-27	17	44295795	Imputed	A	0.140015	17	43663208		Intergenic
rs116939600	cg17117718	24.1854	2.23e-27	17	44282007	Imputed	C	0.133511	17	43663208		Intergenic
rs117415454	cg17117718	24.186	2.23e-27	17	44245766	Imputed	A	0.133468	17	43663208		Intergenic
rs117512131	cg17117718	24.1854	2.23e-27	17	44281308	Imputed	A	0.133511	17	43663208		Intergenic
rs141163281	cg17117718	24.1854	2.23e-27	17	44281722	Imputed	C	0.133511	17	43663208		Intergenic
rs142622006	cg17117718	24.1854	2.23e-27	17	44281588	Imputed	C	0.133511	17	43663208		Intergenic
rs116531125	cg12093005	-24.183	2.25e-27	6	29905437	Imputed	T	0.0718218	12	133086067	FBRSL1	Body
rs117805436	cg17117718	24.18	2.27e-27	17	44351533	Imputed	G	0.136197	17	43663208		Intergenic
rs188248721	cg17117718	24.176	2.29e-27	17	44324257	Imputed	T	0.136528	17	43663208		Intergenic
rs117317248	cg17117718	24.1695	2.34e-27	17	44357796	Imputed	T	0.13336	17	43663208		Intergenic
rs144688527	cg17117718	24.1686	2.34e-27	17	44367296	Imputed	A	0.133316	17	43663208		Intergenic
rs117219290	cg17117718	24.1617	2.39e-27	17	44242574	Imputed	A	0.131725	17	43663208		Intergenic
rs117906284	cg22968622	24.1628	2.39e-27	17	44357198	Imputed	A	0.113904	17	43663579		Intergenic
rs112826856	cg17117718	24.1584	2.42e-27	17	44357466	Imputed	T	0.13373	17	43663208		Intergenic
rs148682680	cg17117718	24.1506	2.47e-27	17	44243739	Imputed	A	0.131904	17	43663208		Intergenic
rs113431630	cg17117718	24.1494	2.48e-27	17	44357761	Imputed	A	0.13377	17	43663208		Intergenic
rs139977436	cg22968622	24.1264	2.66e-27	17	44367551	Imputed	G	0.122691	17	43663579		Intergenic
rs117795763	cg17117718	24.1205	2.7e-27	17	44242536	Imputed	T	0.132103	17	43663208		Intergenic
rs112415401	cg17117718	24.1117	2.77e-27	17	44357645	Imputed	A	0.132315	17	43663208		Intergenic
rs118066295	cg22968622	24.1013	2.86e-27	17	44345668	Imputed	G	0.121978	17	43663579		Intergenic
chr13:44070373:D	cg19169023	-24.0663	3.17e-27	13	44070373	Imputed	C	0.264045	15	41853346	TYRO3	Body
rs1028694	cg19169023	-24.0663	3.17e-27	13	44053468	Genotyped	C	0.264045	15	41853346	TYRO3	Body
rs1323140	cg19169023	-24.0663	3.17e-27	13	44059218	Imputed	A	0.264045	15	41853346	TYRO3	Body
rs1323158	cg19169023	-24.0663	3.17e-27	13	44049321	Imputed	T	0.264045	15	41853346	TYRO3	Body
rs13378247	cg19169023	-24.0663	3.17e-27	13	44068967	Imputed	T	0.264045	15	41853346	TYRO3	Body
rs1853404	cg19169023	-24.0663	3.17e-27	13	44049121	Imputed	A	0.264045	15	41853346	TYRO3	Body
rs4427701	cg19169023	-24.0663	3.17e-27	13	44076924	Imputed	G	0.264045	15	41853346	TYRO3	Body
rs4942232	cg19169023	-24.0663	3.17e-27	13	44059318	Imputed	A	0.264045	15	41853346	TYRO3	Body
rs61959521	cg19169023	-24.0663	3.17e-27	13	44060832	Imputed	T	0.264045	15	41853346	TYRO3	Body
rs7320958	cg19169023	-24.0663	3.17e-27	13	44058451	Imputed	C	0.264045	15	41853346	TYRO3	Body
rs7322290	cg19169023	-24.0663	3.17e-27	13	44058416	Imputed	T	0.264045	15	41853346	TYRO3	Body
rs76835680	cg19169023	-24.0663	3.17e-27	13	44077560	Imputed	A	0.264045	15	41853346	TYRO3	Body
rs9590767	cg19169023	-24.0663	3.17e-27	13	44069562	Imputed	T	0.264045	15	41853346	TYRO3	Body
rs9594950	cg19169023	-24.0663	3.17e-27	13	44048143	Imputed	A	0.264045	15	41853346	TYRO3	Body
rs9594951	cg19169023	-24.0663	3.17e-27	13	44050184	Imputed	T	0.264045	15	41853346	TYRO3	Body
rs9594952	cg19169023	-24.0663	3.17e-27	13	44050355	Imputed	T	0.264045	15	41853346	TYRO3	Body
rs9594953	cg19169023	-24.0663	3.17e-27	13	44058872	Imputed	C	0.264045	15	41853346	TYRO3	Body
rs9594956	cg19169023	-24.0663	3.17e-27	13	44066886	Imputed	T	0.264045	15	41853346	TYRO3	Body
rs9594957	cg19169023	-24.0663	3.17e-27	13	44068228	Imputed	T	0.264045	15	41853346	TYRO3	Body
rs9594959	cg19169023	-24.0663	3.17e-27	13	44071062	Imputed	T	0.264045	15	41853346	TYRO3	Body
rs9594962	cg19169023	-24.0663	3.17e-27	13	44072803	Imputed	T	0.264045	15	41853346	TYRO3	Body
rs9594963	cg19169023	-24.0663	3.17e-27	13	44072969	Imputed	C	0.264045	15	41853346	TYRO3	Body
rs9594964	cg19169023	-24.0663	3.17e-27	13	44074020	Imputed	C	0.264045	15	41853346	TYRO3	Body
rs9594965	cg19169023	-24.0663	3.17e-27	13	44075589	Imputed	A	0.264045	15	41853346	TYRO3	Body
rs9594966	cg19169023	-24.0663	3.17e-27	13	44078678	Genotyped	C	0.264045	15	41853346	TYRO3	Body
rs983655	cg19169023	-24.0663	3.17e-27	13	44058279	Genotyped	T	0.264045	15	41853346	TYRO3	Body
chr13:44103997:I	cg19169023	-24.062	3.21e-27	13	44103997	Imputed	GGCC	0.263955	15	41853346	TYRO3	Body
rs9525788	cg19169023	-24.0627	3.21e-27	13	44050521	Imputed	G	0.264096	15	41853346	TYRO3	Body
rs112624390	cg17117718	24.0582	3.25e-27	17	44343291	Imputed	G	0.136697	17	43663208		Intergenic
rs112945576	cg17117718	24.0582	3.25e-27	17	44343282	Imputed	A	0.136697	17	43663208		Intergenic
rs113211824	cg17117718	24.0582	3.25e-27	17	44343304	Imputed	A	0.136697	17	43663208		Intergenic
rs138489804	cg22968622	24.0583	3.25e-27	17	44343004	Imputed	T	0.117292	17	43663579		Intergenic
rs184967539	cg17117718	24.058	3.25e-27	17	44338534	Imputed	T	0.136551	17	43663208		Intergenic
rs112062294	cg17117718	24.056	3.27e-27	17	44296182	Imputed	T	0.136517	17	43663208		Intergenic
rs112830278	cg17117718	24.056	3.27e-27	17	44296251	Imputed	C	0.136517	17	43663208		Intergenic
rs113917194	cg17117718	24.056	3.27e-27	17	44296230	Imputed	A	0.136517	17	43663208		Intergenic
rs7139852	cg19169023	-24.0559	3.27e-27	13	44112089	Imputed	C	0.263978	15	41853346	TYRO3	Body
rs9590771	cg19169023	-24.0559	3.27e-27	13	44113285	Imputed	C	0.263978	15	41853346	TYRO3	Body
rs113744298	cg17117718	24.0531	3.3e-27	17	44304130	Imputed	G	0.130119	17	43663208		Intergenic
rs141486343	cg17117718	24.0528	3.3e-27	17	44354231	Imputed	G	0.136287	17	43663208		Intergenic
rs117817959	cg17117718	24.0472	3.36e-27	17	44334052	Imputed	A	0.143263	17	43663208		Intergenic
chr17:44357412:D	cg17117718	24.0444	3.38e-27	17	44357412	Imputed	T	0.134034	17	43663208		Intergenic
rs111693597	cg17117718	24.0444	3.38e-27	17	44357453	Imputed	T	0.134034	17	43663208		Intergenic
rs113377745	cg17117718	24.0444	3.38e-27	17	44357351	Imputed	C	0.134034	17	43663208		Intergenic
rs112249029	cg17117718	24.042	3.41e-27	17	44357777	Imputed	T	0.134039	17	43663208		Intergenic
rs113667075	cg17117718	24.0385	3.44e-27	17	44340328	Imputed	C	0.135966	17	43663208		Intergenic
rs78087039	cg19169023	-24.0379	3.45e-27	13	44080370	Imputed	G	0.263871	15	41853346	TYRO3	Body
rs117392217	cg17117718	24.0223	3.61e-27	17	44232959	Imputed	A	0.135949	17	43663208		Intergenic
rs13378766	cg19169023	-24.0186	3.65e-27	13	44069069	Imputed	G	0.263567	15	41853346	TYRO3	Body
rs138073637	cg17117718	24.0123	3.72e-27	17	44340942	Imputed	C	0.138326	17	43663208		Intergenic
chr17:44207415:I	cg17117718	24.0108	3.74e-27	17	44207415	Imputed	GGTGGCAT	0.133629	17	43663208		Intergenic
rs150153238	cg17117718	24.0099	3.75e-27	17	44324572	Imputed	G	0.138762	17	43663208		Intergenic
rs10047763	cg19169023	-24.0057	3.8e-27	13	44082056	Imputed	C	0.263702	15	41853346	TYRO3	Body
rs9590763	cg19169023	-24.0031	3.82e-27	13	44035739	Imputed	A	0.265635	15	41853346	TYRO3	Body
rs117256452	cg17117718	24.0029	3.83e-27	17	44222080	Imputed	C	0.134298	17	43663208		Intergenic
chr17:44219978:D	cg17117718	23.9975	3.89e-27	17	44219978	Imputed	T	0.13491	17	43663208		Intergenic
rs113896715	cg17117718	23.9949	3.92e-27	17	44356746	Imputed	C	0.132961	17	43663208		Intergenic
rs118039215	cg17117718	23.9946	3.92e-27	17	44269442	Imputed	C	0.131371	17	43663208		Intergenic
rs139131949	cg17117718	23.9937	3.93e-27	17	44349169	Imputed	C	0.133938	17	43663208		Intergenic
rs10454617	cg19169023	-23.9927	3.94e-27	13	44082689	Imputed	A	0.26364	15	41853346	TYRO3	Body
chr17:44275172:I	cg17117718	23.9843	4.04e-27	17	44275172	Imputed	ACT	0.135567	17	43663208		Intergenic
rs117798488	cg22968622	23.985	4.04e-27	17	44339665	Imputed	G	0.105271	17	43663579		Intergenic
rs117989086	cg17117718	23.9824	4.07e-27	17	44350395	Imputed	C	0.133659	17	43663208		Intergenic
rs113897852	cg17117718	23.9812	4.08e-27	17	44353318	Imputed	A	0.135155	17	43663208		Intergenic
chr17:44166362:I	cg17117718	23.9696	4.22e-27	17	44166362	Imputed	GA	0.134288	17	43663208		Intergenic
rs118166887	cg17117718	23.9688	4.23e-27	17	44294105	Imputed	T	0.134292	17	43663208		Intergenic
chr17:44349150:D	cg17117718	23.9675	4.25e-27	17	44349150	Imputed	C	0.134226	17	43663208		Intergenic
chr17:44262580:I	cg17117718	23.9639	4.3e-27	17	44262580	Imputed	AC	0.134157	17	43663208		Intergenic
chr17:44273444:I	cg17117718	23.9593	4.35e-27	17	44273444	Imputed	CA	0.134384	17	43663208		Intergenic
rs149459294	cg17117718	23.9565	4.39e-27	17	44326619	Imputed	G	0.136871	17	43663208		Intergenic
rs117673467	cg17117718	23.9455	4.54e-27	17	44283139	Imputed	A	0.135393	17	43663208		Intergenic
rs117844046	cg17117718	23.9449	4.55e-27	17	44246143	Imputed	A	0.133895	17	43663208		Intergenic
rs113313410	cg17117718	23.9436	4.56e-27	17	44238490	Imputed	A	0.133882	17	43663208		Intergenic
rs117120492	cg17117718	23.9405	4.6e-27	17	44258938	Imputed	A	0.13473	17	43663208		Intergenic
rs145251141	cg17117718	23.9385	4.63e-27	17	44232721	Imputed	A	0.134433	17	43663208		Intergenic
chr17:44254686:I	cg17117718	23.9374	4.65e-27	17	44254686	Imputed	TAATGCACAGGAAAA	0.129378	17	43663208		Intergenic
rs117799771	cg17117718	23.9374	4.65e-27	17	44272000	Imputed	A	0.135163	17	43663208		Intergenic
rs143688924	cg17117718	23.9356	4.67e-27	17	44305026	Imputed	A	0.135685	17	43663208		Intergenic
chr17:44172492:I	cg17117718	23.9352	4.68e-27	17	44172492	Imputed	TA	0.134449	17	43663208		Intergenic
chr17:44349136:D	cg17117718	23.9343	4.69e-27	17	44349136	Imputed	C	0.141203	17	43663208		Intergenic
rs138607321	cg17117718	23.9344	4.69e-27	17	44331214	Imputed	C	0.134545	17	43663208		Intergenic
rs117610308	cg17117718	23.9318	4.73e-27	17	44293671	Imputed	G	0.134254	17	43663208		Intergenic
chr17:44325593:D	cg17117718	23.9308	4.74e-27	17	44325593	Imputed	T	0.135494	17	43663208		Intergenic
rs111245553	cg17117718	23.9309	4.74e-27	17	44343121	Imputed	G	0.129399	17	43663208		Intergenic
rs111418565	cg17117718	23.9309	4.74e-27	17	44343392	Imputed	A	0.129399	17	43663208		Intergenic
rs111495978	cg17117718	23.9309	4.74e-27	17	44343084	Imputed	G	0.129399	17	43663208		Intergenic
rs112380767	cg17117718	23.9309	4.74e-27	17	44344222	Imputed	G	0.129399	17	43663208		Intergenic
rs112451887	cg17117718	23.9309	4.74e-27	17	44344219	Imputed	T	0.129399	17	43663208		Intergenic
rs142704860	cg17117718	23.9297	4.76e-27	17	44331242	Imputed	G	0.134567	17	43663208		Intergenic
rs2243967	cg17117718	23.9295	4.76e-27	17	44329636	Imputed	C	0.134663	17	43663208		Intergenic
chr17:44274562:I	cg17117718	23.9278	4.78e-27	17	44274562	Imputed	CA	0.134327	17	43663208		Intergenic
rs150310985	cg17117718	23.9274	4.79e-27	17	44296224	Imputed	T	0.134468	17	43663208		Intergenic
rs111905143	cg17117718	23.9264	4.8e-27	17	44184808	Imputed	G	0.133978	17	43663208		Intergenic
rs117360635	cg17117718	23.9265	4.8e-27	17	44214814	Imputed	A	0.1345	17	43663208		Intergenic
rs118127111	cg17117718	23.9265	4.8e-27	17	44214815	Imputed	G	0.1345	17	43663208		Intergenic
rs117886735	cg17117718	23.9257	4.81e-27	17	44277707	Imputed	G	0.134288	17	43663208		Intergenic
rs117072135	cg17117718	23.9251	4.82e-27	17	44349079	Imputed	A	0.134517	17	43663208		Intergenic
rs118057691	cg17117718	23.9251	4.82e-27	17	44349080	Imputed	G	0.134517	17	43663208		Intergenic
rs146057550	cg17117718	23.9251	4.82e-27	17	44348753	Imputed	C	0.134517	17	43663208		Intergenic
rs148729798	cg17117718	23.9251	4.82e-27	17	44348768	Imputed	G	0.134517	17	43663208		Intergenic
rs117439419	cg17117718	23.9244	4.83e-27	17	44169377	Imputed	C	0.134507	17	43663208		Intergenic
rs116883054	cg17117718	23.924	4.84e-27	17	44255143	Imputed	G	0.134569	17	43663208		Intergenic
rs117711388	cg17117718	23.924	4.84e-27	17	44171554	Imputed	A	0.1345	17	43663208		Intergenic
rs138096595	cg17117718	23.9228	4.85e-27	17	44190156	Imputed	C	0.134517	17	43663208		Intergenic
rs112428092	cg17117718	23.9207	4.88e-27	17	44260845	Imputed	A	0.134506	17	43663208		Intergenic
rs117569148	cg17117718	23.9207	4.88e-27	17	44258446	Imputed	G	0.134506	17	43663208		Intergenic
rs112837971	cg17117718	23.9202	4.89e-27	17	44279347	Imputed	C	0.134506	17	43663208		Intergenic
rs113073249	cg17117718	23.9196	4.9e-27	17	44232616	Imputed	T	0.134517	17	43663208		Intergenic
rs117853176	cg17117718	23.9149	4.97e-27	17	44189408	Imputed	C	0.134601	17	43663208		Intergenic
rs149440682	cg17117718	23.9146	4.97e-27	17	44274838	Imputed	A	0.134545	17	43663208		Intergenic
rs117266894	cg17117718	23.9141	4.98e-27	17	44227882	Imputed	G	0.13453	17	43663208		Intergenic
rs139789399	cg17117718	23.9145	4.98e-27	17	44318663	Imputed	A	0.135978	17	43663208		Intergenic
chr17:44251491:D	cg17117718	23.9136	4.99e-27	17	44251491	Imputed	G	0.134535	17	43663208		Intergenic
rs117852576	cg17117718	23.9137	4.99e-27	17	44275230	Imputed	T	0.134393	17	43663208		Intergenic
rs113249873	cg17117718	23.9129	5e-27	17	44279405	Imputed	T	0.13453	17	43663208		Intergenic
rs117205569	cg17117718	23.913	5e-27	17	44255002	Imputed	A	0.1344	17	43663208		Intergenic
rs117753289	cg17117718	23.9125	5e-27	17	44203311	Imputed	T	0.134534	17	43663208		Intergenic
rs117850622	cg17117718	23.9128	5e-27	17	44269493	Imputed	C	0.134546	17	43663208		Intergenic
rs75670619	cg17117718	23.9125	5e-27	17	44304203	Imputed	C	0.134545	17	43663208		Intergenic
chr17:44185426:D	cg17117718	23.9122	5.01e-27	17	44185426	Imputed	G	0.134534	17	43663208		Intergenic
chr17:44251554:D	cg17117718	23.9124	5.01e-27	17	44251554	Imputed	A	0.135202	17	43663208		Intergenic
chr17:44342738:I	cg17117718	23.9119	5.01e-27	17	44342738	Imputed	CCTT	0.134535	17	43663208		Intergenic
rs113783573	cg17117718	23.9114	5.02e-27	17	44296355	Imputed	A	0.134551	17	43663208		Intergenic
rs113124989	cg17117718	23.9101	5.04e-27	17	44284734	Imputed	C	0.135163	17	43663208		Intergenic
rs117783809	cg17117718	23.9075	5.08e-27	17	44287390	Imputed	G	0.134573	17	43663208		Intergenic
chr17:44184819:D	cg17117718	23.907	5.09e-27	17	44184819	Imputed	C	0.134985	17	43663208		Intergenic
rs6561128	cg19169023	-23.9036	5.14e-27	13	44063268	Imputed	T	0.263433	15	41853346	TYRO3	Body
rs117867119	cg17117718	23.9028	5.15e-27	17	44239556	Imputed	C	0.135236	17	43663208		Intergenic
rs117538072	cg17117718	23.8999	5.2e-27	17	44289291	Imputed	C	0.135449	17	43663208		Intergenic
rs113726467	cg17117718	23.8959	5.26e-27	17	44343371	Imputed	A	0.135101	17	43663208		Intergenic
rs145604922	cg17117718	23.8953	5.27e-27	17	44351858	Imputed	G	0.134631	17	43663208		Intergenic
rs112493812	cg17117718	23.8948	5.28e-27	17	44314179	Imputed	A	0.134635	17	43663208		Intergenic
rs112806969	cg17117718	23.8946	5.28e-27	17	44344178	Imputed	G	0.142067	17	43663208		Intergenic
rs117566552	cg17117718	23.8945	5.28e-27	17	44251243	Imputed	T	0.134624	17	43663208		Intergenic
rs144246842	cg17117718	23.8938	5.29e-27	17	44211502	Imputed	A	0.135079	17	43663208		Intergenic
chr17:44177304:D	cg17117718	23.8929	5.3e-27	17	44177304	Imputed	T	0.135287	17	43663208		Intergenic
rs116895926	cg17117718	23.8926	5.31e-27	17	44244581	Imputed	C	0.135281	17	43663208		Intergenic
rs117241896	cg17117718	23.8918	5.32e-27	17	44345653	Imputed	G	0.135281	17	43663208		Intergenic
rs117090147	cg17117718	23.8882	5.38e-27	17	44188645	Imputed	T	0.134652	17	43663208		Intergenic
rs147945889	cg17117718	23.8869	5.4e-27	17	44179749	Imputed	A	0.134657	17	43663208		Intergenic
rs112626579	cg17117718	23.8861	5.41e-27	17	44192946	Imputed	T	0.134635	17	43663208		Intergenic
rs113459271	cg17117718	23.8861	5.41e-27	17	44192923	Imputed	G	0.134635	17	43663208		Intergenic
rs142850400	cg17117718	23.8842	5.44e-27	17	44353343	Imputed	A	0.134614	17	43663208		Intergenic
rs146009226	cg17117718	23.8842	5.44e-27	17	44353344	Imputed	A	0.134614	17	43663208		Intergenic
rs118036382	cg17117718	23.8794	5.52e-27	17	44233589	Imputed	C	0.134983	17	43663208		Intergenic
rs117830489	cg17117718	23.8779	5.55e-27	17	44223491	Imputed	G	0.134708	17	43663208		Intergenic
chr17:44225955:I	cg17117718	23.8748	5.6e-27	17	44225955	Imputed	CCTT	0.134545	17	43663208		Intergenic
rs117921001	cg17117718	23.8741	5.61e-27	17	44232408	Imputed	A	0.134725	17	43663208		Intergenic
rs117970546	cg17117718	23.8734	5.62e-27	17	44223593	Imputed	C	0.134506	17	43663208		Intergenic
rs117369310	cg17117718	23.8721	5.64e-27	17	44232169	Imputed	G	0.13473	17	43663208		Intergenic
rs117738656	cg17117718	23.8721	5.64e-27	17	44233699	Imputed	T	0.13473	17	43663208		Intergenic
rs118179451	cg17117718	23.8721	5.64e-27	17	44232990	Imputed	C	0.13473	17	43663208		Intergenic
chr17:44172493:I	cg17117718	23.8707	5.67e-27	17	44172493	Imputed	AT	0.134737	17	43663208		Intergenic
rs117847200	cg17117718	23.8707	5.67e-27	17	44195424	Imputed	C	0.13541	17	43663208		Intergenic
rs117163782	cg17117718	23.8702	5.68e-27	17	44269421	Imputed	T	0.134548	17	43663208		Intergenic
rs117588694	cg17117718	23.8694	5.69e-27	17	44254467	Imputed	G	0.13458	17	43663208		Intergenic
rs117528810	cg17117718	23.8689	5.7e-27	17	44273919	Imputed	G	0.134551	17	43663208		Intergenic
rs112015408	cg17117718	23.8672	5.73e-27	17	44220790	Imputed	G	0.134831	17	43663208		Intergenic
rs112595714	cg17117718	23.8672	5.73e-27	17	44220785	Imputed	A	0.134831	17	43663208		Intergenic
rs117016088	cg17117718	23.8667	5.73e-27	17	44223243	Imputed	A	0.135219	17	43663208		Intergenic
rs117023470	cg17117718	23.8668	5.73e-27	17	44268697	Imputed	C	0.134775	17	43663208		Intergenic
rs149056210	cg17117718	23.8672	5.73e-27	17	44282979	Imputed	A	0.134876	17	43663208		Intergenic
rs117659948	cg17117718	23.8663	5.74e-27	17	44282892	Imputed	C	0.134893	17	43663208		Intergenic
rs116886171	cg17117718	23.8645	5.77e-27	17	44250883	Imputed	A	0.134764	17	43663208		Intergenic
rs117025231	cg17117718	23.8646	5.77e-27	17	44283022	Imputed	G	0.134888	17	43663208		Intergenic
rs112980803	cg17117718	23.8642	5.78e-27	17	44343125	Imputed	T	0.134904	17	43663208		Intergenic
rs116862913	cg17117718	23.8643	5.78e-27	17	44224980	Imputed	C	0.134753	17	43663208		Intergenic
rs117151489	cg17117718	23.8639	5.78e-27	17	44167729	Imputed	G	0.134569	17	43663208		Intergenic
rs117346514	cg17117718	23.8643	5.78e-27	17	44219888	Imputed	T	0.134753	17	43663208		Intergenic
rs117421119	cg17117718	23.8643	5.78e-27	17	44223034	Imputed	C	0.134753	17	43663208		Intergenic
rs117467521	cg17117718	23.8639	5.78e-27	17	44167464	Imputed	A	0.134569	17	43663208		Intergenic
rs117711747	cg17117718	23.8643	5.78e-27	17	44225440	Imputed	C	0.134754	17	43663208		Intergenic
rs117812918	cg17117718	23.8639	5.78e-27	17	44167101	Imputed	C	0.134569	17	43663208		Intergenic
rs118186261	cg17117718	23.8639	5.78e-27	17	44167661	Imputed	T	0.134569	17	43663208		Intergenic
rs117615351	cg17117718	23.8636	5.79e-27	17	44244397	Imputed	A	0.135017	17	43663208		Intergenic
rs117629202	cg17117718	23.8633	5.79e-27	17	44344596	Imputed	A	0.134764	17	43663208		Intergenic
rs117995241	cg17117718	23.8633	5.79e-27	17	44344595	Imputed	T	0.134764	17	43663208		Intergenic
rs117334964	cg17117718	23.8632	5.8e-27	17	44217791	Imputed	C	0.134758	17	43663208		Intergenic
rs118055851	cg17117718	23.8628	5.8e-27	17	44271512	Imputed	C	0.134619	17	43663208		Intergenic
rs149477634	cg17117718	23.8631	5.8e-27	17	44257974	Imputed	A	0.13477	17	43663208		Intergenic
rs113313878	cg17117718	23.8623	5.81e-27	17	44356637	Imputed	T	0.134545	17	43663208		Intergenic
rs150079804	cg17117718	23.8624	5.81e-27	17	44226980	Imputed	G	0.13458	17	43663208		Intergenic
rs113507264	cg17117718	23.8617	5.82e-27	17	44340253	Imputed	G	0.134893	17	43663208		Intergenic
rs117271057	cg17117718	23.8617	5.82e-27	17	44340525	Imputed	C	0.134893	17	43663208		Intergenic
rs117374804	cg17117718	23.8617	5.82e-27	17	44344097	Imputed	C	0.134893	17	43663208		Intergenic
rs118004776	cg17117718	23.8617	5.82e-27	17	44339473	Imputed	G	0.134893	17	43663208		Intergenic
rs144094388	cg17117718	23.8618	5.82e-27	17	44328668	Imputed	G	0.134799	17	43663208		Intergenic
rs79098809	cg17117718	23.8617	5.82e-27	17	44340506	Imputed	G	0.134893	17	43663208		Intergenic
rs116956796	cg17117718	23.8612	5.83e-27	17	44173356	Imputed	G	0.134612	17	43663208		Intergenic
rs117344850	cg17117718	23.8612	5.83e-27	17	44173179	Imputed	A	0.134612	17	43663208		Intergenic
rs118172521	cg17117718	23.8612	5.83e-27	17	44283479	Imputed	C	0.134876	17	43663208		Intergenic
chr17:44170129:I	cg17117718	23.8605	5.84e-27	17	44170129	Imputed	CAA	0.134781	17	43663208		Intergenic
chr17:44275658:D	cg17117718	23.8605	5.84e-27	17	44275658	Imputed	T	0.134781	17	43663208		Intergenic
rs112596352	cg17117718	23.8605	5.84e-27	17	44170238	Imputed	A	0.134781	17	43663208		Intergenic
rs113518294	cg17117718	23.8604	5.84e-27	17	44226561	Imputed	G	0.134624	17	43663208		Intergenic
rs113667975	cg17117718	23.8605	5.84e-27	17	44170018	Imputed	C	0.134781	17	43663208		Intergenic
rs118019216	cg17117718	23.8603	5.84e-27	17	44200510	Imputed	A	0.134871	17	43663208		Intergenic
rs116868854	cg17117718	23.8601	5.85e-27	17	44288702	Imputed	T	0.134787	17	43663208		Intergenic
rs117656372	cg17117718	23.8598	5.85e-27	17	44255550	Imputed	G	0.134781	17	43663208		Intergenic
rs117671932	cg17117718	23.8599	5.85e-27	17	44342327	Imputed	G	0.13523	17	43663208		Intergenic
rs118092567	cg17117718	23.8598	5.85e-27	17	44259261	Imputed	G	0.134781	17	43663208		Intergenic
rs116875997	cg17117718	23.8596	5.86e-27	17	44221836	Imputed	T	0.134775	17	43663208		Intergenic
rs117337684	cg17117718	23.8596	5.86e-27	17	44225886	Imputed	A	0.134775	17	43663208		Intergenic
rs117566287	cg17117718	23.8596	5.86e-27	17	44222019	Imputed	T	0.134775	17	43663208		Intergenic
rs117687562	cg17117718	23.8594	5.86e-27	17	44327370	Imputed	A	0.134803	17	43663208		Intergenic
rs117738914	cg17117718	23.8596	5.86e-27	17	44219905	Imputed	A	0.134775	17	43663208		Intergenic
rs118093314	cg17117718	23.8594	5.86e-27	17	44283761	Imputed	T	0.134871	17	43663208		Intergenic
rs138180884	cg17117718	23.8594	5.86e-27	17	44326509	Imputed	A	0.134803	17	43663208		Intergenic
rs141341386	cg17117718	23.8597	5.86e-27	17	44305252	Imputed	A	0.135051	17	43663208		Intergenic
rs144921942	cg17117718	23.8594	5.86e-27	17	44327958	Imputed	G	0.134803	17	43663208		Intergenic
rs147014359	cg17117718	23.8594	5.86e-27	17	44326396	Imputed	C	0.134803	17	43663208		Intergenic
rs185676110	cg17117718	23.8596	5.86e-27	17	44350293	Imputed	G	0.134792	17	43663208		Intergenic
rs113146341	cg17117718	23.8588	5.87e-27	17	44296097	Imputed	T	0.134792	17	43663208		Intergenic
rs117114757	cg17117718	23.8588	5.87e-27	17	44172391	Imputed	T	0.134792	17	43663208		Intergenic
rs117962469	cg17117718	23.8588	5.87e-27	17	44172698	Imputed	C	0.134792	17	43663208		Intergenic
rs118105789	cg17117718	23.8588	5.87e-27	17	44172408	Imputed	G	0.134792	17	43663208		Intergenic
chr17:44224569:D	cg17117718	23.8584	5.88e-27	17	44224569	Imputed	C	0.134781	17	43663208		Intergenic
rs113417185	cg17117718	23.8584	5.88e-27	17	44228265	Imputed	C	0.134781	17	43663208		Intergenic
rs117581248	cg17117718	23.8584	5.88e-27	17	44224782	Imputed	T	0.134781	17	43663208		Intergenic
rs117661326	cg17117718	23.8585	5.88e-27	17	44269217	Imputed	C	0.134792	17	43663208		Intergenic
rs118048278	cg17117718	23.8585	5.88e-27	17	44287373	Imputed	C	0.134787	17	43663208		Intergenic
rs118098769	cg17117718	23.8584	5.88e-27	17	44250616	Imputed	A	0.134865	17	43663208		Intergenic
rs141697873	cg17117718	23.8585	5.88e-27	17	44310101	Imputed	G	0.134865	17	43663208		Intergenic
rs2668668	cg17117718	23.8584	5.88e-27	17	44284641	Imputed	G	0.13486	17	43663208		Intergenic
chr17:44220863:D	cg17117718	23.857	5.9e-27	17	44220863	Imputed	A	0.134871	17	43663208		Intergenic
rs111797115	cg17117718	23.857	5.9e-27	17	44220942	Imputed	A	0.134871	17	43663208		Intergenic
rs117122375	cg17117718	23.857	5.9e-27	17	44220454	Imputed	G	0.134871	17	43663208		Intergenic
rs117355999	cg17117718	23.8572	5.9e-27	17	44239639	Imputed	A	0.134787	17	43663208		Intergenic
rs117381130	cg17117718	23.8572	5.9e-27	17	44228621	Imputed	A	0.134787	17	43663208		Intergenic
rs117439954	cg17117718	23.8572	5.9e-27	17	44246330	Imputed	C	0.134787	17	43663208		Intergenic
rs117617520	cg17117718	23.8572	5.9e-27	17	44239225	Imputed	A	0.134787	17	43663208		Intergenic
rs137967143	cg17117718	23.8572	5.9e-27	17	44257923	Imputed	A	0.134792	17	43663208		Intergenic
rs141388053	cg17117718	23.8574	5.9e-27	17	44295052	Imputed	C	0.134792	17	43663208		Intergenic
rs116950386	cg17117718	23.8566	5.91e-27	17	44186055	Imputed	A	0.13464	17	43663208		Intergenic
rs117025337	cg17117718	23.8566	5.91e-27	17	44226126	Imputed	C	0.13464	17	43663208		Intergenic
rs117034045	cg17117718	23.8563	5.91e-27	17	44256710	Imputed	C	0.134798	17	43663208		Intergenic
rs117244259	cg17117718	23.8564	5.91e-27	17	44207360	Imputed	T	0.134809	17	43663208		Intergenic
rs117838917	cg17117718	23.8566	5.91e-27	17	44177755	Imputed	G	0.13464	17	43663208		Intergenic
rs118177173	cg17117718	23.8566	5.91e-27	17	44177097	Imputed	T	0.13464	17	43663208		Intergenic
rs114144298	cg17117718	23.8562	5.92e-27	17	44250108	Imputed	C	0.134966	17	43663208		Intergenic
rs117359018	cg17117718	23.8559	5.92e-27	17	44266975	Imputed	A	0.134798	17	43663208		Intergenic
rs117967689	cg17117718	23.8559	5.92e-27	17	44293546	Imputed	T	0.134798	17	43663208		Intergenic
rs117991446	cg17117718	23.8559	5.92e-27	17	44263955	Imputed	G	0.134798	17	43663208		Intergenic
rs138137490	cg17117718	23.8559	5.92e-27	17	44248837	Imputed	C	0.134792	17	43663208		Intergenic
rs140563304	cg17117718	23.8559	5.92e-27	17	44293939	Imputed	G	0.134798	17	43663208		Intergenic
rs117199708	cg17117718	23.8555	5.93e-27	17	44346393	Imputed	G	0.13482	17	43663208		Intergenic
rs118127683	cg17117718	23.8554	5.93e-27	17	44209985	Imputed	C	0.13482	17	43663208		Intergenic
chr17:44179168:D	cg17117718	23.8546	5.94e-27	17	44179168	Imputed	A	0.134803	17	43663208		Intergenic
chr17:44203855:I	cg17117718	23.8546	5.94e-27	17	44203855	Imputed	CTCAA	0.134803	17	43663208		Intergenic
chr17:44229708:D	cg17117718	23.8547	5.94e-27	17	44229708	Imputed	G	0.134799	17	43663208		Intergenic
rs112073200	cg17117718	23.8546	5.94e-27	17	44201791	Imputed	C	0.134803	17	43663208		Intergenic
rs117173681	cg17117718	23.8547	5.94e-27	17	44229364	Imputed	C	0.134799	17	43663208		Intergenic
rs117412588	cg17117718	23.8546	5.94e-27	17	44184404	Imputed	A	0.134803	17	43663208		Intergenic
rs117744619	cg17117718	23.8547	5.94e-27	17	44245359	Imputed	A	0.134798	17	43663208		Intergenic
rs117793672	cg17117718	23.8546	5.94e-27	17	44302904	Imputed	C	0.134803	17	43663208		Intergenic
rs118131570	cg17117718	23.8546	5.94e-27	17	44207523	Imputed	A	0.134803	17	43663208		Intergenic
rs148992948	cg17117718	23.8546	5.94e-27	17	44304910	Imputed	C	0.134803	17	43663208		Intergenic
rs117037949	cg17117718	23.8541	5.95e-27	17	44270809	Imputed	G	0.135125	17	43663208		Intergenic
rs117436329	cg17117718	23.8542	5.95e-27	17	44185245	Imputed	A	0.134854	17	43663208		Intergenic
rs117915297	cg17117718	23.8542	5.95e-27	17	44271152	Imputed	A	0.134854	17	43663208		Intergenic
rs112839636	cg17117718	23.854	5.96e-27	17	44353320	Imputed	A	0.134733	17	43663208		Intergenic
rs116961004	cg17117718	23.8537	5.96e-27	17	44230647	Imputed	T	0.13486	17	43663208		Intergenic
rs117439726	cg17117718	23.854	5.96e-27	17	44353206	Imputed	C	0.134733	17	43663208		Intergenic
rs117689497	cg17117718	23.854	5.96e-27	17	44353114	Imputed	C	0.134733	17	43663208		Intergenic
rs117934638	cg17117718	23.854	5.96e-27	17	44353175	Imputed	C	0.134733	17	43663208		Intergenic
rs117198771	cg17117718	23.8534	5.97e-27	17	44246527	Imputed	C	0.134803	17	43663208		Intergenic
rs117536891	cg17117718	23.8534	5.97e-27	17	44230097	Imputed	T	0.134803	17	43663208		Intergenic
rs117757293	cg17117718	23.8534	5.97e-27	17	44231827	Imputed	C	0.134803	17	43663208		Intergenic
rs117830374	cg17117718	23.8534	5.97e-27	17	44249199	Imputed	G	0.134803	17	43663208		Intergenic
rs118028663	cg17117718	23.8534	5.97e-27	17	44249096	Imputed	C	0.134803	17	43663208		Intergenic
chr17:44348963:D	cg17117718	23.852	5.99e-27	17	44348963	Imputed	T	0.13482	17	43663208		Intergenic
chr17:44349761:I	cg17117718	23.852	5.99e-27	17	44349761	Imputed	AT	0.13482	17	43663208		Intergenic
chr17:44349787:D	cg17117718	23.852	5.99e-27	17	44349787	Imputed	T	0.13482	17	43663208		Intergenic
rs112120926	cg17117718	23.852	5.99e-27	17	44351578	Imputed	C	0.13482	17	43663208		Intergenic
rs112523136	cg17117718	23.852	5.99e-27	17	44348387	Imputed	G	0.13482	17	43663208		Intergenic
rs112593050	cg17117718	23.852	5.99e-27	17	44348298	Imputed	G	0.13482	17	43663208		Intergenic
rs112861504	cg17117718	23.852	5.99e-27	17	44348356	Imputed	A	0.13482	17	43663208		Intergenic
rs113798705	cg17117718	23.852	5.99e-27	17	44351452	Imputed	C	0.13482	17	43663208		Intergenic
rs113988658	cg17117718	23.852	5.99e-27	17	44351731	Imputed	G	0.13482	17	43663208		Intergenic
rs116972200	cg17117718	23.852	5.99e-27	17	44351007	Imputed	C	0.13482	17	43663208		Intergenic
rs116984005	cg17117718	23.852	5.99e-27	17	44348848	Imputed	A	0.13482	17	43663208		Intergenic
rs117159173	cg17117718	23.852	5.99e-27	17	44350203	Imputed	G	0.13482	17	43663208		Intergenic
rs117235142	cg17117718	23.852	5.99e-27	17	44350662	Imputed	C	0.13482	17	43663208		Intergenic
rs117305492	cg17117718	23.852	5.99e-27	17	44349347	Imputed	G	0.13482	17	43663208		Intergenic
rs117380588	cg17117718	23.852	5.99e-27	17	44351249	Imputed	A	0.13482	17	43663208		Intergenic
rs117465907	cg17117718	23.852	5.99e-27	17	44347727	Imputed	T	0.13482	17	43663208		Intergenic
rs117610502	cg17117718	23.8522	5.99e-27	17	44255784	Imputed	G	0.134809	17	43663208		Intergenic
rs117639060	cg17117718	23.852	5.99e-27	17	44350217	Imputed	G	0.13482	17	43663208		Intergenic
rs117686025	cg17117718	23.852	5.99e-27	17	44350511	Imputed	G	0.13482	17	43663208		Intergenic
rs117700702	cg17117718	23.852	5.99e-27	17	44349736	Imputed	T	0.13482	17	43663208		Intergenic
rs117770115	cg17117718	23.852	5.99e-27	17	44348825	Imputed	G	0.13482	17	43663208		Intergenic
rs117885345	cg17117718	23.852	5.99e-27	17	44350125	Imputed	T	0.13482	17	43663208		Intergenic
rs117933312	cg17117718	23.852	5.99e-27	17	44350527	Imputed	A	0.13482	17	43663208		Intergenic
rs117943355	cg17117718	23.852	5.99e-27	17	44349744	Imputed	G	0.13482	17	43663208		Intergenic
rs118113616	cg17117718	23.852	5.99e-27	17	44348987	Imputed	A	0.13482	17	43663208		Intergenic
rs140226828	cg17117718	23.852	5.99e-27	17	44349380	Imputed	G	0.13482	17	43663208		Intergenic
rs144566168	cg17117718	23.852	5.99e-27	17	44348616	Imputed	T	0.13482	17	43663208		Intergenic
rs147820602	cg17117718	23.8522	5.99e-27	17	44274933	Imputed	G	0.134809	17	43663208		Intergenic
rs148294922	cg17117718	23.852	5.99e-27	17	44350460	Imputed	G	0.13482	17	43663208		Intergenic
rs148382831	cg17117718	23.852	5.99e-27	17	44349899	Imputed	A	0.13482	17	43663208		Intergenic
rs117272799	cg17117718	23.8516	6e-27	17	44352970	Imputed	A	0.134737	17	43663208		Intergenic
rs144215416	cg17117718	23.8514	6e-27	17	44346674	Imputed	C	0.134899	17	43663208		Intergenic
chr17:44287709:I	cg17117718	23.8509	6.01e-27	17	44287709	Imputed	AG	0.134815	17	43663208		Intergenic
chr17:44354157:I	cg17117718	23.8511	6.01e-27	17	44354157	Imputed	TTTTC	0.134742	17	43663208		Intergenic
rs111633472	cg17117718	23.8512	6.01e-27	17	44169605	Imputed	C	0.13482	17	43663208		Intergenic
rs111944040	cg17117718	23.8512	6.01e-27	17	44296179	Imputed	C	0.13482	17	43663208		Intergenic
rs111970616	cg17117718	23.8512	6.01e-27	17	44169581	Imputed	C	0.13482	17	43663208		Intergenic
rs112994126	cg17117718	23.8511	6.01e-27	17	44353505	Imputed	T	0.134742	17	43663208		Intergenic
rs113043104	cg17117718	23.8512	6.01e-27	17	44169406	Imputed	A	0.13482	17	43663208		Intergenic
rs117149447	cg17117718	23.8509	6.01e-27	17	44269922	Imputed	C	0.134815	17	43663208		Intergenic
rs117162421	cg17117718	23.8512	6.01e-27	17	44169437	Imputed	C	0.13482	17	43663208		Intergenic
rs117295539	cg17117718	23.8512	6.01e-27	17	44169759	Imputed	A	0.13482	17	43663208		Intergenic
rs117297660	cg17117718	23.8509	6.01e-27	17	44273889	Imputed	T	0.134815	17	43663208		Intergenic
rs117405727	cg17117718	23.8508	6.01e-27	17	44226817	Imputed	A	0.1345	17	43663208		Intergenic
rs117484297	cg17117718	23.8509	6.01e-27	17	44288281	Imputed	T	0.134815	17	43663208		Intergenic
rs117585479	cg17117718	23.8512	6.01e-27	17	44195495	Imputed	A	0.13482	17	43663208		Intergenic
rs117607304	cg17117718	23.8509	6.01e-27	17	44266692	Imputed	A	0.134815	17	43663208		Intergenic
rs117873919	cg17117718	23.8507	6.01e-27	17	44344810	Imputed	G	0.13486	17	43663208		Intergenic
rs118064448	cg17117718	23.8512	6.01e-27	17	44168508	Imputed	T	0.13482	17	43663208		Intergenic
rs118132091	cg17117718	23.8512	6.01e-27	17	44169769	Imputed	T	0.13482	17	43663208		Intergenic
rs141911350	cg17117718	23.8509	6.01e-27	17	44287006	Imputed	G	0.134815	17	43663208		Intergenic
rs76178664	cg17117718	23.8509	6.01e-27	17	44266364	Imputed	G	0.134815	17	43663208		Intergenic
chr17:44207900:I	cg17117718	23.8506	6.02e-27	17	44207900	Imputed	ACT	0.134972	17	43663208		Intergenic
rs116992865	cg17117718	23.8506	6.02e-27	17	44207887	Imputed	T	0.134972	17	43663208		Intergenic
rs117392678	cg17117718	23.8506	6.02e-27	17	44208218	Imputed	G	0.134972	17	43663208		Intergenic
rs117421979	cg17117718	23.8506	6.02e-27	17	44207932	Imputed	G	0.134972	17	43663208		Intergenic
rs117643442	cg17117718	23.8506	6.02e-27	17	44208144	Imputed	G	0.134972	17	43663208		Intergenic
rs117747674	cg17117718	23.8506	6.02e-27	17	44207778	Imputed	G	0.134972	17	43663208		Intergenic
rs148470649	cg17117718	23.8506	6.02e-27	17	44285142	Imputed	C	0.134843	17	43663208		Intergenic
chr17:44163547:D	cg17117718	23.8496	6.03e-27	17	44163547	Imputed	A	0.134822	17	43663208		Intergenic
chr17:44280598:D	cg17117718	23.8496	6.03e-27	17	44280598	Imputed	T	0.13482	17	43663208		Intergenic
rs116912938	cg17117718	23.8498	6.03e-27	17	44272679	Imputed	C	0.134843	17	43663208		Intergenic
rs117210862	cg17117718	23.8496	6.03e-27	17	44250473	Imputed	C	0.13482	17	43663208		Intergenic
rs117796296	cg17117718	23.8496	6.03e-27	17	44276479	Imputed	G	0.13482	17	43663208		Intergenic
rs117832263	cg17117718	23.8496	6.03e-27	17	44164323	Imputed	A	0.134822	17	43663208		Intergenic
rs117877895	cg17117718	23.8496	6.03e-27	17	44285683	Imputed	C	0.13482	17	43663208		Intergenic
rs117980624	cg17117718	23.8496	6.03e-27	17	44217226	Imputed	G	0.13482	17	43663208		Intergenic
rs75741127	cg17117718	23.8496	6.03e-27	17	44285436	Imputed	T	0.13482	17	43663208		Intergenic
rs117658398	cg17117718	23.8494	6.04e-27	17	44348013	Imputed	G	0.134831	17	43663208		Intergenic
rs117679798	cg17117718	23.8487	6.05e-27	17	44349283	Imputed	C	0.134809	17	43663208		Intergenic
rs116866893	cg17117718	23.8484	6.06e-27	17	44263923	Imputed	C	0.134826	17	43663208		Intergenic
rs145803931	cg17117718	23.8484	6.06e-27	17	44212032	Imputed	A	0.134826	17	43663208		Intergenic
rs148081288	cg17117718	23.8484	6.06e-27	17	44286972	Imputed	C	0.134826	17	43663208		Intergenic
chr17:44316878:D	cg17117718	23.8479	6.07e-27	17	44316878	Imputed	C	0.135101	17	43663208		Intergenic
rs117709001	cg17117718	23.8475	6.07e-27	17	44228609	Imputed	G	0.134843	17	43663208		Intergenic
chr17:44172205:D	cg17117718	23.8471	6.08e-27	17	44172205	Imputed	C	0.134831	17	43663208		Intergenic
chr17:44185427:I	cg17117718	23.8471	6.08e-27	17	44185427	Imputed	AT	0.134831	17	43663208		Intergenic
chr17:44195611:D	cg17117718	23.8471	6.08e-27	17	44195611	Imputed	C	0.134831	17	43663208		Intergenic
chr17:44197417:I	cg17117718	23.8471	6.08e-27	17	44197417	Imputed	TGAA	0.134831	17	43663208		Intergenic
chr17:44197775:I	cg17117718	23.8471	6.08e-27	17	44197775	Imputed	GCA	0.134831	17	43663208		Intergenic
chr17:44198962:I	cg17117718	23.8471	6.08e-27	17	44198962	Imputed	TA	0.134831	17	43663208		Intergenic
chr17:44204299:D	cg17117718	23.8471	6.08e-27	17	44204299	Imputed	A	0.134831	17	43663208		Intergenic
chr17:44212521:I	cg17117718	23.8471	6.08e-27	17	44212521	Imputed	TG	0.134831	17	43663208		Intergenic
chr17:44215416:I	cg17117718	23.8471	6.08e-27	17	44215416	Imputed	AG	0.134831	17	43663208		Intergenic
chr17:44216966:I	cg17117718	23.8471	6.08e-27	17	44216966	Imputed	GC	0.134831	17	43663208		Intergenic
chr17:44238130:D	cg17117718	23.8471	6.08e-27	17	44238130	Imputed	A	0.134831	17	43663208		Intergenic
chr17:44250669:D	cg17117718	23.8471	6.08e-27	17	44250669	Imputed	T	0.134831	17	43663208		Intergenic
chr17:44254993:D	cg17117718	23.8471	6.08e-27	17	44254993	Imputed	G	0.134831	17	43663208		Intergenic
chr17:44261613:I	cg17117718	23.8471	6.08e-27	17	44261613	Imputed	TCC	0.134831	17	43663208		Intergenic
chr17:44276431:I	cg17117718	23.8471	6.08e-27	17	44276431	Imputed	TAGAA	0.134831	17	43663208		Intergenic
chr17:44279371:D	cg17117718	23.8471	6.08e-27	17	44279371	Imputed	T	0.134831	17	43663208		Intergenic
chr17:44279557:D	cg17117718	23.8471	6.08e-27	17	44279557	Imputed	T	0.134831	17	43663208		Intergenic
chr17:44285460:I	cg17117718	23.8471	6.08e-27	17	44285460	Imputed	GA	0.134831	17	43663208		Intergenic
chr17:44288114:D	cg17117718	23.8471	6.08e-27	17	44288114	Imputed	T	0.134831	17	43663208		Intergenic
chr17:44338593:D	cg17117718	23.8471	6.08e-27	17	44338593	Imputed	A	0.134831	17	43663208		Intergenic
rs111337375	cg17117718	23.8471	6.08e-27	17	44277818	Imputed	G	0.134831	17	43663208		Intergenic
rs111369188	cg17117718	23.8471	6.08e-27	17	44266531	Imputed	A	0.134831	17	43663208		Intergenic
rs111390023	cg17117718	23.8471	6.08e-27	17	44163411	Imputed	C	0.134831	17	43663208		Intergenic
rs111398090	cg17117718	23.8471	6.08e-27	17	44192957	Imputed	C	0.134831	17	43663208		Intergenic
rs111449057	cg17117718	23.8471	6.08e-27	17	44289232	Imputed	T	0.134831	17	43663208		Intergenic
rs111507114	cg17117718	23.8471	6.08e-27	17	44279252	Imputed	G	0.134831	17	43663208		Intergenic
rs111541342	cg17117718	23.8471	6.08e-27	17	44251548	Imputed	A	0.134831	17	43663208		Intergenic
rs111854089	cg17117718	23.8471	6.08e-27	17	44344541	Imputed	A	0.134831	17	43663208		Intergenic
rs111927953	cg17117718	23.8471	6.08e-27	17	44288640	Imputed	G	0.134831	17	43663208		Intergenic
rs111944356	cg17117718	23.8471	6.08e-27	17	44289150	Imputed	C	0.134831	17	43663208		Intergenic
rs111969097	cg17117718	23.8471	6.08e-27	17	44200015	Imputed	C	0.134831	17	43663208		Intergenic
rs112088005	cg17117718	23.8471	6.08e-27	17	44289220	Imputed	T	0.134831	17	43663208		Intergenic
rs112126591	cg17117718	23.8471	6.08e-27	17	44251582	Imputed	C	0.134831	17	43663208		Intergenic
rs112142358	cg17117718	23.8471	6.08e-27	17	44261137	Imputed	T	0.134831	17	43663208		Intergenic
rs112327670	cg17117718	23.8471	6.08e-27	17	44202231	Imputed	G	0.134831	17	43663208		Intergenic
rs112560196	cg17117718	23.8471	6.08e-27	17	44200078	Imputed	T	0.134831	17	43663208		Intergenic
rs112899435	cg17117718	23.8471	6.08e-27	17	44221042	Imputed	T	0.134831	17	43663208		Intergenic
rs112907155	cg17117718	23.8471	6.08e-27	17	44200033	Imputed	C	0.134831	17	43663208		Intergenic
rs112934982	cg17117718	23.8471	6.08e-27	17	44345286	Imputed	G	0.134831	17	43663208		Intergenic
rs113065530	cg17117718	23.8471	6.08e-27	17	44266342	Imputed	C	0.134831	17	43663208		Intergenic
rs113226080	cg17117718	23.8471	6.08e-27	17	44266290	Imputed	C	0.134831	17	43663208		Intergenic
rs113234183	cg17117718	23.8471	6.08e-27	17	44266227	Imputed	C	0.134831	17	43663208		Intergenic
rs113493003	cg17117718	23.8471	6.08e-27	17	44345114	Imputed	T	0.134831	17	43663208		Intergenic
rs113634064	cg17117718	23.8471	6.08e-27	17	44275619	Imputed	G	0.134831	17	43663208		Intergenic
rs113699705	cg17117718	23.8471	6.08e-27	17	44277825	Imputed	T	0.134831	17	43663208		Intergenic
rs113830390	cg17117718	23.8471	6.08e-27	17	44344552	Imputed	T	0.134831	17	43663208		Intergenic
rs113915912	cg17117718	23.8471	6.08e-27	17	44196653	Imputed	A	0.134831	17	43663208		Intergenic
rs113941543	cg17117718	23.8471	6.08e-27	17	44184375	Imputed	G	0.134831	17	43663208		Intergenic
rs114393584	cg17117718	23.8471	6.08e-27	17	44273448	Imputed	A	0.134831	17	43663208		Intergenic
rs115509702	cg17117718	23.8471	6.08e-27	17	44219831	Imputed	A	0.134831	17	43663208		Intergenic
rs115855724	cg17117718	23.8471	6.08e-27	17	44246405	Imputed	A	0.134831	17	43663208		Intergenic
rs116804473	cg17117718	23.8471	6.08e-27	17	44197603	Imputed	C	0.134831	17	43663208		Intergenic
rs116841091	cg17117718	23.8471	6.08e-27	17	44165852	Imputed	G	0.134831	17	43663208		Intergenic
rs116858919	cg17117718	23.8471	6.08e-27	17	44231326	Imputed	A	0.134831	17	43663208		Intergenic
rs116861544	cg17117718	23.8471	6.08e-27	17	44238938	Imputed	C	0.134831	17	43663208		Intergenic
rs116862736	cg17117718	23.8471	6.08e-27	17	44202952	Imputed	G	0.134831	17	43663208		Intergenic
rs116864963	cg17117718	23.8471	6.08e-27	17	44213934	Imputed	A	0.134831	17	43663208		Intergenic
rs116870545	cg17117718	23.8471	6.08e-27	17	44269726	Imputed	A	0.134831	17	43663208		Intergenic
rs116875990	cg17117718	23.8471	6.08e-27	17	44196153	Imputed	G	0.134831	17	43663208		Intergenic
rs116876224	cg17117718	23.8471	6.08e-27	17	44246997	Imputed	A	0.134831	17	43663208		Intergenic
rs116894817	cg17117718	23.8471	6.08e-27	17	44270059	Imputed	T	0.134831	17	43663208		Intergenic
rs116907076	cg17117718	23.8471	6.08e-27	17	44240107	Imputed	C	0.134831	17	43663208		Intergenic
rs116909189	cg17117718	23.8471	6.08e-27	17	44247314	Imputed	T	0.134831	17	43663208		Intergenic
rs116909846	cg17117718	23.8471	6.08e-27	17	44267164	Imputed	T	0.134831	17	43663208		Intergenic
rs116950219	cg17117718	23.8471	6.08e-27	17	44213204	Imputed	T	0.134831	17	43663208		Intergenic
rs116964613	cg17117718	23.8471	6.08e-27	17	44217112	Imputed	T	0.134831	17	43663208		Intergenic
rs116966126	cg17117718	23.8471	6.08e-27	17	44222067	Imputed	G	0.134831	17	43663208		Intergenic
rs116968497	cg17117718	23.8471	6.08e-27	17	44207066	Imputed	G	0.134831	17	43663208		Intergenic
rs116969861	cg17117718	23.8471	6.08e-27	17	44287310	Imputed	G	0.134831	17	43663208		Intergenic
rs116978232	cg17117718	23.8471	6.08e-27	17	44292126	Imputed	C	0.134831	17	43663208		Intergenic
rs116983492	cg17117718	23.8471	6.08e-27	17	44225802	Imputed	T	0.134831	17	43663208		Intergenic
rs116984773	cg17117718	23.8471	6.08e-27	17	44210988	Imputed	G	0.134831	17	43663208		Intergenic
rs116993804	cg17117718	23.8471	6.08e-27	17	44194152	Imputed	A	0.134831	17	43663208		Intergenic
rs116995956	cg17117718	23.8471	6.08e-27	17	44174513	Imputed	A	0.134831	17	43663208		Intergenic
rs117009090	cg17117718	23.8471	6.08e-27	17	44194519	Imputed	C	0.134831	17	43663208		Intergenic
rs117011189	cg17117718	23.8471	6.08e-27	17	44225485	Imputed	C	0.134831	17	43663208		Intergenic
rs117013191	cg17117718	23.8471	6.08e-27	17	44210442	Imputed	T	0.134831	17	43663208		Intergenic
rs117013974	cg17117718	23.8471	6.08e-27	17	44201680	Imputed	C	0.134831	17	43663208		Intergenic
rs117019333	cg17117718	23.8471	6.08e-27	17	44166197	Imputed	G	0.134831	17	43663208		Intergenic
rs117028000	cg17117718	23.8471	6.08e-27	17	44289628	Imputed	C	0.134831	17	43663208		Intergenic
rs117028732	cg17117718	23.8471	6.08e-27	17	44222460	Imputed	G	0.134831	17	43663208		Intergenic
rs117029203	cg17117718	23.8471	6.08e-27	17	44203366	Imputed	C	0.134831	17	43663208		Intergenic
rs117030770	cg17117718	23.8471	6.08e-27	17	44186593	Imputed	C	0.134831	17	43663208		Intergenic
rs117033351	cg17117718	23.8471	6.08e-27	17	44344970	Imputed	C	0.134831	17	43663208		Intergenic
rs117033919	cg17117718	23.8471	6.08e-27	17	44248042	Imputed	A	0.134831	17	43663208		Intergenic
rs117035114	cg17117718	23.8471	6.08e-27	17	44264045	Imputed	C	0.134831	17	43663208		Intergenic
rs117037310	cg17117718	23.8471	6.08e-27	17	44278661	Imputed	A	0.134831	17	43663208		Intergenic
rs117054185	cg17117718	23.8471	6.08e-27	17	44274451	Imputed	C	0.134831	17	43663208		Intergenic
rs117057426	cg17117718	23.8471	6.08e-27	17	44196799	Imputed	A	0.134831	17	43663208		Intergenic
rs117057704	cg17117718	23.8471	6.08e-27	17	44244926	Imputed	G	0.134831	17	43663208		Intergenic
rs117060846	cg17117718	23.8471	6.08e-27	17	44179992	Imputed	G	0.134831	17	43663208		Intergenic
rs117066083	cg17117718	23.8471	6.08e-27	17	44279760	Imputed	A	0.134831	17	43663208		Intergenic
rs117072329	cg17117718	23.8471	6.08e-27	17	44264717	Imputed	C	0.134831	17	43663208		Intergenic
rs117074282	cg17117718	23.8471	6.08e-27	17	44346962	Imputed	T	0.134831	17	43663208		Intergenic
rs117078032	cg17117718	23.8471	6.08e-27	17	44233433	Imputed	C	0.134831	17	43663208		Intergenic
rs117086929	cg17117718	23.8471	6.08e-27	17	44204739	Imputed	C	0.134831	17	43663208		Intergenic
rs117088000	cg17117718	23.8471	6.08e-27	17	44228824	Imputed	G	0.134831	17	43663208		Intergenic
rs117090537	cg17117718	23.8471	6.08e-27	17	44291479	Imputed	A	0.134831	17	43663208		Intergenic
rs117093104	cg17117718	23.8471	6.08e-27	17	44171565	Imputed	A	0.134831	17	43663208		Intergenic
rs117099279	cg17117718	23.8471	6.08e-27	17	44280188	Imputed	A	0.134831	17	43663208		Intergenic
rs117103359	cg17117718	23.8471	6.08e-27	17	44347218	Imputed	A	0.134831	17	43663208		Intergenic
rs117106696	cg17117718	23.8471	6.08e-27	17	44348265	Imputed	C	0.134831	17	43663208		Intergenic
rs117111579	cg17117718	23.8471	6.08e-27	17	44227510	Imputed	T	0.134831	17	43663208		Intergenic
rs117117817	cg17117718	23.8471	6.08e-27	17	44233776	Imputed	C	0.134831	17	43663208		Intergenic
rs117124445	cg17117718	23.8471	6.08e-27	17	44205500	Imputed	G	0.134831	17	43663208		Intergenic
rs117139143	cg17117718	23.8471	6.08e-27	17	44177337	Imputed	T	0.134831	17	43663208		Intergenic
rs117163661	cg17117718	23.8471	6.08e-27	17	44201887	Imputed	T	0.134831	17	43663208		Intergenic
rs117170565	cg17117718	23.8471	6.08e-27	17	44246211	Imputed	G	0.134831	17	43663208		Intergenic
rs117172170	cg17117718	23.8471	6.08e-27	17	44209474	Imputed	T	0.134831	17	43663208		Intergenic
rs117172203	cg17117718	23.8471	6.08e-27	17	44261753	Imputed	C	0.134831	17	43663208		Intergenic
rs117176110	cg17117718	23.8471	6.08e-27	17	44318184	Imputed	G	0.134831	17	43663208		Intergenic
rs117181745	cg17117718	23.8471	6.08e-27	17	44196822	Imputed	A	0.134831	17	43663208		Intergenic
rs117184432	cg17117718	23.8471	6.08e-27	17	44180173	Imputed	G	0.134831	17	43663208		Intergenic
rs117187923	cg17117718	23.8471	6.08e-27	17	44191085	Imputed	A	0.134831	17	43663208		Intergenic
rs117189205	cg17117718	23.8471	6.08e-27	17	44263729	Imputed	G	0.134831	17	43663208		Intergenic
rs117190742	cg17117718	23.8471	6.08e-27	17	44277265	Imputed	C	0.134831	17	43663208		Intergenic
rs117191478	cg17117718	23.8471	6.08e-27	17	44164090	Imputed	C	0.134831	17	43663208		Intergenic
rs117191567	cg17117718	23.8471	6.08e-27	17	44198806	Imputed	C	0.134831	17	43663208		Intergenic
rs117202207	cg17117718	23.8471	6.08e-27	17	44216226	Imputed	G	0.134831	17	43663208		Intergenic
rs117202541	cg17117718	23.8471	6.08e-27	17	44276330	Imputed	C	0.134831	17	43663208		Intergenic
rs117208195	cg17117718	23.8471	6.08e-27	17	44271430	Imputed	G	0.134831	17	43663208		Intergenic
rs117217364	cg17117718	23.8471	6.08e-27	17	44182181	Imputed	C	0.134831	17	43663208		Intergenic
rs117220523	cg17117718	23.8471	6.08e-27	17	44258422	Imputed	T	0.134831	17	43663208		Intergenic
rs117225424	cg17117718	23.8471	6.08e-27	17	44227196	Imputed	C	0.134831	17	43663208		Intergenic
rs117225544	cg17117718	23.8471	6.08e-27	17	44288579	Imputed	C	0.134831	17	43663208		Intergenic
rs117244974	cg17117718	23.8471	6.08e-27	17	44231117	Imputed	C	0.134831	17	43663208		Intergenic
rs117245479	cg17117718	23.8471	6.08e-27	17	44344822	Imputed	A	0.134831	17	43663208		Intergenic
rs117262853	cg17117718	23.8471	6.08e-27	17	44267170	Imputed	T	0.134831	17	43663208		Intergenic
rs117264941	cg17117718	23.8471	6.08e-27	17	44255777	Imputed	A	0.134831	17	43663208		Intergenic
rs117266776	cg17117718	23.8471	6.08e-27	17	44243979	Imputed	T	0.134831	17	43663208		Intergenic
rs117271347	cg17117718	23.8471	6.08e-27	17	44214094	Imputed	G	0.134831	17	43663208		Intergenic
rs117275282	cg17117718	23.8471	6.08e-27	17	44290047	Imputed	A	0.134831	17	43663208		Intergenic
rs117283235	cg17117718	23.8471	6.08e-27	17	44222335	Imputed	A	0.134831	17	43663208		Intergenic
rs117297395	cg17117718	23.8471	6.08e-27	17	44348593	Imputed	G	0.134831	17	43663208		Intergenic
rs117300072	cg17117718	23.8471	6.08e-27	17	44173408	Imputed	A	0.134831	17	43663208		Intergenic
rs117309232	cg17117718	23.8471	6.08e-27	17	44298102	Imputed	A	0.134831	17	43663208		Intergenic
rs117317034	cg17117718	23.8471	6.08e-27	17	44346610	Imputed	G	0.134831	17	43663208		Intergenic
rs117320809	cg17117718	23.8471	6.08e-27	17	44223387	Imputed	C	0.134831	17	43663208		Intergenic
rs117325185	cg17117718	23.8471	6.08e-27	17	44209628	Imputed	C	0.134831	17	43663208		Intergenic
rs117327659	cg17117718	23.8471	6.08e-27	17	44196015	Imputed	G	0.134831	17	43663208		Intergenic
rs117334825	cg17117718	23.8471	6.08e-27	17	44204749	Imputed	G	0.134831	17	43663208		Intergenic
rs117335450	cg17117718	23.8471	6.08e-27	17	44193097	Imputed	A	0.134831	17	43663208		Intergenic
rs117335771	cg17117718	23.8471	6.08e-27	17	44238966	Imputed	C	0.134831	17	43663208		Intergenic
rs117335890	cg17117718	23.8471	6.08e-27	17	44203131	Imputed	G	0.134831	17	43663208		Intergenic
rs117337393	cg17117718	23.8471	6.08e-27	17	44186301	Imputed	C	0.134831	17	43663208		Intergenic
rs117344299	cg17117718	23.8471	6.08e-27	17	44209957	Imputed	G	0.134831	17	43663208		Intergenic
rs117347376	cg17117718	23.8471	6.08e-27	17	44240986	Imputed	A	0.134831	17	43663208		Intergenic
rs117353463	cg17117718	23.8471	6.08e-27	17	44206646	Imputed	G	0.134831	17	43663208		Intergenic
rs117356487	cg17117718	23.8471	6.08e-27	17	44191835	Imputed	G	0.134831	17	43663208		Intergenic
rs117384817	cg17117718	23.8471	6.08e-27	17	44166646	Imputed	T	0.134831	17	43663208		Intergenic
rs117387301	cg17117718	23.8471	6.08e-27	17	44260416	Imputed	C	0.134831	17	43663208		Intergenic
rs117403537	cg17117718	23.8471	6.08e-27	17	44258231	Imputed	G	0.134831	17	43663208		Intergenic
rs117403921	cg17117718	23.8471	6.08e-27	17	44264943	Imputed	C	0.134831	17	43663208		Intergenic
rs117410462	cg17117718	23.8471	6.08e-27	17	44194381	Imputed	A	0.134831	17	43663208		Intergenic
rs117413301	cg17117718	23.8471	6.08e-27	17	44176092	Imputed	A	0.134831	17	43663208		Intergenic
rs117414283	cg17117718	23.8471	6.08e-27	17	44249800	Imputed	A	0.134831	17	43663208		Intergenic
rs117427945	cg17117718	23.8471	6.08e-27	17	44275035	Imputed	G	0.134831	17	43663208		Intergenic
rs117444285	cg17117718	23.8471	6.08e-27	17	44241664	Imputed	C	0.134831	17	43663208		Intergenic
rs117453663	cg17117718	23.8471	6.08e-27	17	44348932	Imputed	G	0.134831	17	43663208		Intergenic
rs117460980	cg17117718	23.8471	6.08e-27	17	44292319	Imputed	C	0.134831	17	43663208		Intergenic
rs117462927	cg17117718	23.8471	6.08e-27	17	44262403	Imputed	T	0.134831	17	43663208		Intergenic
rs117465666	cg17117718	23.8471	6.08e-27	17	44233811	Imputed	T	0.134831	17	43663208		Intergenic
rs117470053	cg17117718	23.8471	6.08e-27	17	44182706	Imputed	G	0.134831	17	43663208		Intergenic
rs117474729	cg17117718	23.8471	6.08e-27	17	44266022	Imputed	G	0.134831	17	43663208		Intergenic
rs117484022	cg17117718	23.8471	6.08e-27	17	44277691	Imputed	C	0.134831	17	43663208		Intergenic
rs117503095	cg17117718	23.8471	6.08e-27	17	44181454	Imputed	T	0.134831	17	43663208		Intergenic
rs117504851	cg17117718	23.8471	6.08e-27	17	44203413	Imputed	T	0.134831	17	43663208		Intergenic
rs117507786	cg17117718	23.8471	6.08e-27	17	44186894	Imputed	C	0.134831	17	43663208		Intergenic
rs117520932	cg17117718	23.8471	6.08e-27	17	44164133	Imputed	A	0.134831	17	43663208		Intergenic
rs117535293	cg17117718	23.8471	6.08e-27	17	44209875	Imputed	C	0.134831	17	43663208		Intergenic
rs117537911	cg17117718	23.8471	6.08e-27	17	44344858	Imputed	G	0.134831	17	43663208		Intergenic
rs117540057	cg17117718	23.8471	6.08e-27	17	44206079	Imputed	T	0.134831	17	43663208		Intergenic
rs117541612	cg17117718	23.8471	6.08e-27	17	44178337	Imputed	C	0.134831	17	43663208		Intergenic
rs117548235	cg17117718	23.8471	6.08e-27	17	44177669	Imputed	T	0.134831	17	43663208		Intergenic
rs117557352	cg17117718	23.8471	6.08e-27	17	44194891	Imputed	T	0.134831	17	43663208		Intergenic
rs117567585	cg17117718	23.8471	6.08e-27	17	44243179	Imputed	G	0.134831	17	43663208		Intergenic
rs117576233	cg17117718	23.8471	6.08e-27	17	44179969	Imputed	A	0.134831	17	43663208		Intergenic
rs117579985	cg17117718	23.8471	6.08e-27	17	44272552	Imputed	T	0.134831	17	43663208		Intergenic
rs117591346	cg17117718	23.8471	6.08e-27	17	44213921	Imputed	C	0.134831	17	43663208		Intergenic
rs117592463	cg17117718	23.8471	6.08e-27	17	44197032	Imputed	C	0.134831	17	43663208		Intergenic
rs117595209	cg17117718	23.8471	6.08e-27	17	44180442	Imputed	G	0.134831	17	43663208		Intergenic
rs117598837	cg17117718	23.8471	6.08e-27	17	44269546	Imputed	T	0.134831	17	43663208		Intergenic
rs117618977	cg17117718	23.8471	6.08e-27	17	44255017	Imputed	C	0.134831	17	43663208		Intergenic
rs117619315	cg17117718	23.8471	6.08e-27	17	44174351	Imputed	A	0.134831	17	43663208		Intergenic
rs117638484	cg17117718	23.8471	6.08e-27	17	44189373	Imputed	T	0.134831	17	43663208		Intergenic
rs117639556	cg17117718	23.8471	6.08e-27	17	44237372	Imputed	C	0.134831	17	43663208		Intergenic
rs117643130	cg17117718	23.8471	6.08e-27	17	44223060	Imputed	A	0.134831	17	43663208		Intergenic
rs117645386	cg17117718	23.8471	6.08e-27	17	44234060	Imputed	G	0.134831	17	43663208		Intergenic
rs117645421	cg17117718	23.8471	6.08e-27	17	44268488	Imputed	T	0.134831	17	43663208		Intergenic
rs117648158	cg17117718	23.8471	6.08e-27	17	44248769	Imputed	C	0.134831	17	43663208		Intergenic
rs117652308	cg17117718	23.8471	6.08e-27	17	44279803	Imputed	G	0.134831	17	43663208		Intergenic
rs117659442	cg17117718	23.8471	6.08e-27	17	44310234	Imputed	C	0.134831	17	43663208		Intergenic
rs117704395	cg17117718	23.8471	6.08e-27	17	44192395	Imputed	T	0.134831	17	43663208		Intergenic
rs117709075	cg17117718	23.8471	6.08e-27	17	44218242	Imputed	T	0.134831	17	43663208		Intergenic
rs117710929	cg17117718	23.8471	6.08e-27	17	44166500	Imputed	A	0.134831	17	43663208		Intergenic
rs117711010	cg17117718	23.8471	6.08e-27	17	44203520	Imputed	T	0.134831	17	43663208		Intergenic
rs117713385	cg17117718	23.8471	6.08e-27	17	44237790	Imputed	A	0.134831	17	43663208		Intergenic
rs117713698	cg17117718	23.8471	6.08e-27	17	44170612	Imputed	T	0.134831	17	43663208		Intergenic
rs117714092	cg17117718	23.8471	6.08e-27	17	44186252	Imputed	A	0.134831	17	43663208		Intergenic
rs117727280	cg17117718	23.8471	6.08e-27	17	44183616	Imputed	A	0.134831	17	43663208		Intergenic
rs117732596	cg17117718	23.8471	6.08e-27	17	44172327	Imputed	A	0.134831	17	43663208		Intergenic
rs117740770	cg17117718	23.8471	6.08e-27	17	44201667	Imputed	A	0.134831	17	43663208		Intergenic
rs117748595	cg17117718	23.8471	6.08e-27	17	44267227	Imputed	G	0.134831	17	43663208		Intergenic
rs117758323	cg17117718	23.8471	6.08e-27	17	44236725	Imputed	A	0.134831	17	43663208		Intergenic
rs117759145	cg17117718	23.8471	6.08e-27	17	44263965	Imputed	C	0.134831	17	43663208		Intergenic
rs117764734	cg17117718	23.8471	6.08e-27	17	44241304	Imputed	G	0.134831	17	43663208		Intergenic
rs117765419	cg17117718	23.8471	6.08e-27	17	44267863	Imputed	A	0.134831	17	43663208		Intergenic
rs117778700	cg17117718	23.8471	6.08e-27	17	44205839	Imputed	G	0.134831	17	43663208		Intergenic
rs117783111	cg17117718	23.8471	6.08e-27	17	44262418	Imputed	A	0.134831	17	43663208		Intergenic
rs117783241	cg17117718	23.8471	6.08e-27	17	44293020	Imputed	A	0.134831	17	43663208		Intergenic
rs117790185	cg17117718	23.8471	6.08e-27	17	44279101	Imputed	G	0.134831	17	43663208		Intergenic
rs117794432	cg17117718	23.8471	6.08e-27	17	44258354	Imputed	C	0.134831	17	43663208		Intergenic
rs117796649	cg17117718	23.8471	6.08e-27	17	44227186	Imputed	A	0.134831	17	43663208		Intergenic
rs117807910	cg17117718	23.8471	6.08e-27	17	44181508	Imputed	G	0.134831	17	43663208		Intergenic
rs117823412	cg17117718	23.8471	6.08e-27	17	44194735	Imputed	T	0.134831	17	43663208		Intergenic
rs117825464	cg17117718	23.8471	6.08e-27	17	44188477	Imputed	G	0.134831	17	43663208		Intergenic
rs117834711	cg17117718	23.8471	6.08e-27	17	44180997	Imputed	T	0.134831	17	43663208		Intergenic
rs117839927	cg17117718	23.8471	6.08e-27	17	44201865	Imputed	T	0.134831	17	43663208		Intergenic
rs117842738	cg17117718	23.8471	6.08e-27	17	44184428	Imputed	C	0.134831	17	43663208		Intergenic
rs117846856	cg17117718	23.8471	6.08e-27	17	44209364	Imputed	A	0.134831	17	43663208		Intergenic
rs117852904	cg17117718	23.8471	6.08e-27	17	44265702	Imputed	T	0.134831	17	43663208		Intergenic
rs117859952	cg17117718	23.8471	6.08e-27	17	44217293	Imputed	A	0.134831	17	43663208		Intergenic
rs117861590	cg17117718	23.8471	6.08e-27	17	44273264	Imputed	A	0.134831	17	43663208		Intergenic
rs117864661	cg17117718	23.8471	6.08e-27	17	44209919	Imputed	G	0.134831	17	43663208		Intergenic
rs117865418	cg17117718	23.8471	6.08e-27	17	44206482	Imputed	T	0.134831	17	43663208		Intergenic
rs117866200	cg17117718	23.8471	6.08e-27	17	44178839	Imputed	C	0.134831	17	43663208		Intergenic
rs117867813	cg17117718	23.8471	6.08e-27	17	44266972	Imputed	G	0.134831	17	43663208		Intergenic
rs117868947	cg17117718	23.8471	6.08e-27	17	44234526	Imputed	T	0.134831	17	43663208		Intergenic
rs117876324	cg17117718	23.8471	6.08e-27	17	44258914	Imputed	G	0.134831	17	43663208		Intergenic
rs117891750	cg17117718	23.8471	6.08e-27	17	44199670	Imputed	A	0.134831	17	43663208		Intergenic
rs117896144	cg17117718	23.8471	6.08e-27	17	44346589	Imputed	A	0.134831	17	43663208		Intergenic
rs117909362	cg17117718	23.8471	6.08e-27	17	44181118	Imputed	A	0.134831	17	43663208		Intergenic
rs117916627	cg17117718	23.8471	6.08e-27	17	44267904	Imputed	C	0.134831	17	43663208		Intergenic
rs117918840	cg17117718	23.8471	6.08e-27	17	44201109	Imputed	G	0.134831	17	43663208		Intergenic
rs117928039	cg17117718	23.8471	6.08e-27	17	44249621	Imputed	G	0.134831	17	43663208		Intergenic
rs117931571	cg17117718	23.8471	6.08e-27	17	44274985	Imputed	A	0.134831	17	43663208		Intergenic
rs117934912	cg17117718	23.8471	6.08e-27	17	44171024	Imputed	C	0.134831	17	43663208		Intergenic
rs117938762	cg17117718	23.8471	6.08e-27	17	44238424	Imputed	A	0.134831	17	43663208		Intergenic
rs117941968	cg17117718	23.8471	6.08e-27	17	44347638	Imputed	T	0.134831	17	43663208		Intergenic
rs117942639	cg17117718	23.8471	6.08e-27	17	44272928	Imputed	A	0.134831	17	43663208		Intergenic
rs117953839	cg17117718	23.8471	6.08e-27	17	44215823	Imputed	G	0.134831	17	43663208		Intergenic
rs117961794	cg17117718	23.8471	6.08e-27	17	44202147	Imputed	G	0.134831	17	43663208		Intergenic
rs117965721	cg17117718	23.8471	6.08e-27	17	44229986	Imputed	C	0.134831	17	43663208		Intergenic
rs117971750	cg17117718	23.8471	6.08e-27	17	44194835	Imputed	C	0.134831	17	43663208		Intergenic
rs117988306	cg17117718	23.8471	6.08e-27	17	44338279	Imputed	C	0.134831	17	43663208		Intergenic
rs117991442	cg17117718	23.8471	6.08e-27	17	44289101	Imputed	G	0.134831	17	43663208		Intergenic
rs117992557	cg17117718	23.8471	6.08e-27	17	44231617	Imputed	T	0.134831	17	43663208		Intergenic
rs117994526	cg17117718	23.8471	6.08e-27	17	44267617	Imputed	G	0.134831	17	43663208		Intergenic
rs118008635	cg17117718	23.8471	6.08e-27	17	44178272	Imputed	T	0.134831	17	43663208		Intergenic
rs118012446	cg17117718	23.8471	6.08e-27	17	44166311	Imputed	T	0.134831	17	43663208		Intergenic
rs118015320	cg17117718	23.8471	6.08e-27	17	44196447	Imputed	A	0.134831	17	43663208		Intergenic
rs118016834	cg17117718	23.8471	6.08e-27	17	44228529	Imputed	A	0.134831	17	43663208		Intergenic
rs118017286	cg17117718	23.8471	6.08e-27	17	44251230	Imputed	C	0.134831	17	43663208		Intergenic
rs118017492	cg17117718	23.8471	6.08e-27	17	44255532	Imputed	C	0.134831	17	43663208		Intergenic
rs118018091	cg17117718	23.8471	6.08e-27	17	44225234	Imputed	C	0.134831	17	43663208		Intergenic
rs118024861	cg17117718	23.8471	6.08e-27	17	44194621	Imputed	G	0.134831	17	43663208		Intergenic
rs118025414	cg17117718	23.8471	6.08e-27	17	44215045	Imputed	C	0.134831	17	43663208		Intergenic
rs118034160	cg17117718	23.8471	6.08e-27	17	44211902	Imputed	G	0.134831	17	43663208		Intergenic
rs118041124	cg17117718	23.8471	6.08e-27	17	44345090	Imputed	A	0.134831	17	43663208		Intergenic
rs118044025	cg17117718	23.8471	6.08e-27	17	44257473	Imputed	C	0.134831	17	43663208		Intergenic
rs118052173	cg17117718	23.8471	6.08e-27	17	44180954	Imputed	G	0.134831	17	43663208		Intergenic
rs118056180	cg17117718	23.8471	6.08e-27	17	44170414	Imputed	A	0.134831	17	43663208		Intergenic
rs118063927	cg17117718	23.8471	6.08e-27	17	44198080	Imputed	T	0.134831	17	43663208		Intergenic
rs118067837	cg17117718	23.8471	6.08e-27	17	44348370	Imputed	G	0.134831	17	43663208		Intergenic
rs118070169	cg17117718	23.8471	6.08e-27	17	44191159	Imputed	T	0.134831	17	43663208		Intergenic
rs118073567	cg17117718	23.8471	6.08e-27	17	44246624	Imputed	A	0.134831	17	43663208		Intergenic
rs118073907	cg17117718	23.8471	6.08e-27	17	44221602	Imputed	C	0.134831	17	43663208		Intergenic
rs118074274	cg17117718	23.8471	6.08e-27	17	44196125	Imputed	C	0.134831	17	43663208		Intergenic
rs118079708	cg17117718	23.8471	6.08e-27	17	44208945	Imputed	T	0.134831	17	43663208		Intergenic
rs118090376	cg17117718	23.8471	6.08e-27	17	44227531	Imputed	C	0.134831	17	43663208		Intergenic
rs118091894	cg17117718	23.8471	6.08e-27	17	44288672	Imputed	A	0.134831	17	43663208		Intergenic
rs118100616	cg17117718	23.8471	6.08e-27	17	44280523	Imputed	G	0.134831	17	43663208		Intergenic
rs118119757	cg17117718	23.8471	6.08e-27	17	44291365	Imputed	T	0.134831	17	43663208		Intergenic
rs118131053	cg17117718	23.8471	6.08e-27	17	44231295	Imputed	A	0.134831	17	43663208		Intergenic
rs118137985	cg17117718	23.8471	6.08e-27	17	44228770	Imputed	G	0.134831	17	43663208		Intergenic
rs118142480	cg17117718	23.8471	6.08e-27	17	44226030	Imputed	A	0.134831	17	43663208		Intergenic
rs118143337	cg17117718	23.8471	6.08e-27	17	44247673	Imputed	A	0.134831	17	43663208		Intergenic
rs118152960	cg17117718	23.8471	6.08e-27	17	44221350	Imputed	A	0.134831	17	43663208		Intergenic
rs118154068	cg17117718	23.8471	6.08e-27	17	44216158	Imputed	C	0.134831	17	43663208		Intergenic
rs118161660	cg17117718	23.8471	6.08e-27	17	44265328	Imputed	G	0.134831	17	43663208		Intergenic
rs118181051	cg17117718	23.8471	6.08e-27	17	44181933	Imputed	C	0.134831	17	43663208		Intergenic
rs118186458	cg17117718	23.8471	6.08e-27	17	44197806	Imputed	C	0.134831	17	43663208		Intergenic
rs137984402	cg17117718	23.8471	6.08e-27	17	44276013	Imputed	A	0.134831	17	43663208		Intergenic
rs138327084	cg17117718	23.8471	6.08e-27	17	44242788	Imputed	T	0.134831	17	43663208		Intergenic
rs138527361	cg17117718	23.8471	6.08e-27	17	44277923	Imputed	A	0.134831	17	43663208		Intergenic
rs138881951	cg17117718	23.8471	6.08e-27	17	44274766	Imputed	C	0.134831	17	43663208		Intergenic
rs139438959	cg17117718	23.8471	6.08e-27	17	44346751	Imputed	G	0.134831	17	43663208		Intergenic
rs140087949	cg17117718	23.8471	6.08e-27	17	44313757	Imputed	A	0.134831	17	43663208		Intergenic
rs140697321	cg17117718	23.8471	6.08e-27	17	44280902	Imputed	C	0.134831	17	43663208		Intergenic
rs140861371	cg17117718	23.8471	6.08e-27	17	44165049	Imputed	G	0.134831	17	43663208		Intergenic
rs142380190	cg17117718	23.8471	6.08e-27	17	44188755	Imputed	C	0.134831	17	43663208		Intergenic
rs142475938	cg17117718	23.8471	6.08e-27	17	44205122	Imputed	G	0.134831	17	43663208		Intergenic
rs143171217	cg17117718	23.8471	6.08e-27	17	44348221	Imputed	G	0.134831	17	43663208		Intergenic
rs143353433	cg17117718	23.8471	6.08e-27	17	44302752	Imputed	A	0.134831	17	43663208		Intergenic
rs143485253	cg17117718	23.8471	6.08e-27	17	44165435	Imputed	T	0.134831	17	43663208		Intergenic
rs143807772	cg17117718	23.8471	6.08e-27	17	44209313	Imputed	C	0.134831	17	43663208		Intergenic
rs144064129	cg17117718	23.8471	6.08e-27	17	44321527	Imputed	T	0.134831	17	43663208		Intergenic
rs144140981	cg17117718	23.8471	6.08e-27	17	44346829	Imputed	T	0.134831	17	43663208		Intergenic
rs144205025	cg17117718	23.8471	6.08e-27	17	44191682	Imputed	A	0.134831	17	43663208		Intergenic
rs144580401	cg17117718	23.8471	6.08e-27	17	44165069	Imputed	G	0.134831	17	43663208		Intergenic
rs144626848	cg17117718	23.8471	6.08e-27	17	44277867	Imputed	A	0.134831	17	43663208		Intergenic
rs144690603	cg17117718	23.8471	6.08e-27	17	44344926	Imputed	G	0.134831	17	43663208		Intergenic
rs145644686	cg17117718	23.8471	6.08e-27	17	44182336	Imputed	A	0.134831	17	43663208		Intergenic
rs145758147	cg17117718	23.8471	6.08e-27	17	44193882	Imputed	T	0.134831	17	43663208		Intergenic
rs145848989	cg17117718	23.8471	6.08e-27	17	44301546	Imputed	C	0.134831	17	43663208		Intergenic
rs145868307	cg17117718	23.8471	6.08e-27	17	44178884	Imputed	A	0.134831	17	43663208		Intergenic
rs146250646	cg17117718	23.8471	6.08e-27	17	44291381	Imputed	G	0.134831	17	43663208		Intergenic
rs147061347	cg17117718	23.8471	6.08e-27	17	44242969	Imputed	C	0.134831	17	43663208		Intergenic
rs147315706	cg17117718	23.8471	6.08e-27	17	44258954	Imputed	C	0.134831	17	43663208		Intergenic
rs147462511	cg17117718	23.8471	6.08e-27	17	44165098	Imputed	T	0.134831	17	43663208		Intergenic
rs147642589	cg17117718	23.8471	6.08e-27	17	44300067	Imputed	G	0.134831	17	43663208		Intergenic
rs148736305	cg17117718	23.8471	6.08e-27	17	44224686	Imputed	T	0.134831	17	43663208		Intergenic
rs148802198	cg17117718	23.8471	6.08e-27	17	44259040	Imputed	C	0.134831	17	43663208		Intergenic
rs149426978	cg17117718	23.8471	6.08e-27	17	44263479	Imputed	C	0.134831	17	43663208		Intergenic
rs149740398	cg17117718	23.8471	6.08e-27	17	44351285	Imputed	G	0.134831	17	43663208		Intergenic
rs150038808	cg17117718	23.8471	6.08e-27	17	44298178	Imputed	G	0.134831	17	43663208		Intergenic
rs150320162	cg17117718	23.8471	6.08e-27	17	44349867	Imputed	A	0.134831	17	43663208		Intergenic
rs150471993	cg17117718	23.8471	6.08e-27	17	44316076	Imputed	T	0.134831	17	43663208		Intergenic
rs150594649	cg17117718	23.8471	6.08e-27	17	44291820	Imputed	G	0.134831	17	43663208		Intergenic
rs150652921	cg17117718	23.847	6.08e-27	17	44318575	Imputed	G	0.134904	17	43663208		Intergenic
rs17577094	cg17117718	23.8471	6.08e-27	17	44187492	Genotyped	G	0.134831	17	43663208		Intergenic
rs17660132	cg17117718	23.8471	6.08e-27	17	44165803	Genotyped	C	0.134831	17	43663208		Intergenic
rs17660464	cg17117718	23.8471	6.08e-27	17	44177993	Genotyped	A	0.134831	17	43663208		Intergenic
rs181575614	cg17117718	23.8471	6.08e-27	17	44308547	Imputed	A	0.134831	17	43663208		Intergenic
rs184069025	cg17117718	23.8471	6.08e-27	17	44274560	Imputed	C	0.134831	17	43663208		Intergenic
rs187810302	cg17117718	23.8471	6.08e-27	17	44204304	Imputed	G	0.134831	17	43663208		Intergenic
rs1881194	cg17117718	23.8471	6.08e-27	17	44248814	Genotyped	A	0.134831	17	43663208		Intergenic
rs2463524	cg17117718	23.8471	6.08e-27	17	44326245	Genotyped	G	0.134831	17	43663208		Intergenic
rs2469933	cg17117718	23.8471	6.08e-27	17	44285531	Genotyped	A	0.134831	17	43663208		Intergenic
rs2532233	cg17117718	23.8471	6.08e-27	17	44273218	Imputed	T	0.134831	17	43663208		Intergenic
rs2532316	cg17117718	23.8471	6.08e-27	17	44213712	Genotyped	A	0.134831	17	43663208		Intergenic
rs2532329	cg17117718	23.8471	6.08e-27	17	44350090	Genotyped	A	0.134831	17	43663208		Intergenic
rs2732651	cg17117718	23.8471	6.08e-27	17	44345063	Genotyped	T	0.134831	17	43663208		Intergenic
rs2732674	cg17117718	23.8471	6.08e-27	17	44280697	Genotyped	C	0.134831	17	43663208		Intergenic
rs2957297	cg17117718	23.8471	6.08e-27	17	44368212	Genotyped	A	0.134831	17	43663208		Intergenic
rs55669501	cg17117718	23.8471	6.08e-27	17	44202564	Imputed	A	0.134831	17	43663208		Intergenic
rs55686102	cg17117718	23.8471	6.08e-27	17	44202608	Imputed	T	0.134831	17	43663208		Intergenic
rs55825513	cg17117718	23.8471	6.08e-27	17	44176215	Imputed	A	0.134831	17	43663208		Intergenic
rs76970448	cg17117718	23.8471	6.08e-27	17	44260967	Imputed	A	0.134831	17	43663208		Intergenic
chr17:44182845:I	cg17117718	23.8467	6.09e-27	17	44182845	Imputed	TG	0.13482	17	43663208		Intergenic
rs112892892	cg17117718	23.8466	6.09e-27	17	44338503	Imputed	A	0.134843	17	43663208		Intergenic
rs116906708	cg17117718	23.8465	6.09e-27	17	44276821	Imputed	A	0.134916	17	43663208		Intergenic
rs117462267	cg17117718	23.8465	6.09e-27	17	44276618	Imputed	G	0.134916	17	43663208		Intergenic
rs117974938	cg17117718	23.8465	6.09e-27	17	44276578	Imputed	C	0.134916	17	43663208		Intergenic
rs117630747	cg17117718	23.8459	6.1e-27	17	44270985	Imputed	A	0.135534	17	43663208		Intergenic
chr17:44275649:D	cg17117718	23.8447	6.12e-27	17	44275649	Imputed	C	0.13491	17	43663208		Intergenic
rs117153599	cg17117718	23.8446	6.12e-27	17	44284057	Imputed	T	0.135039	17	43663208		Intergenic
rs117650190	cg17117718	23.8446	6.12e-27	17	44259792	Imputed	A	0.134837	17	43663208		Intergenic
rs117818149	cg17117718	23.8451	6.12e-27	17	44351686	Imputed	T	0.134837	17	43663208		Intergenic
rs117969095	cg17117718	23.845	6.12e-27	17	44288156	Imputed	C	0.134904	17	43663208		Intergenic
rs142815515	cg17117718	23.8443	6.13e-27	17	44316389	Imputed	A	0.134766	17	43663208		Intergenic
rs186217479	cg17117718	23.8446	6.13e-27	17	44344300	Imputed	T	0.134904	17	43663208		Intergenic
rs117295299	cg17117718	23.8432	6.15e-27	17	44351929	Imputed	G	0.134843	17	43663208		Intergenic
rs118108956	cg17117718	23.8432	6.15e-27	17	44270293	Imputed	T	0.13486	17	43663208		Intergenic
rs147239733	cg17117718	23.843	6.15e-27	17	44305186	Imputed	C	0.13486	17	43663208		Intergenic
rs186215051	cg22968622	23.8421	6.17e-27	17	44312530	Imputed	A	0.116535	17	43663579		Intergenic
rs112165529	cg17117718	23.8411	6.19e-27	17	44356770	Imputed	A	0.134624	17	43663208		Intergenic
rs116889916	cg17117718	23.8411	6.19e-27	17	44284542	Imputed	A	0.135028	17	43663208		Intergenic
rs117970858	cg17117718	23.841	6.19e-27	17	44199029	Imputed	C	0.135281	17	43663208		Intergenic
rs138251639	cg17117718	23.8408	6.19e-27	17	44356320	Imputed	T	0.134687	17	43663208		Intergenic
rs117477859	cg17117718	23.8403	6.2e-27	17	44250236	Imputed	G	0.134725	17	43663208		Intergenic
chr17:44345047:I	cg17117718	23.8389	6.23e-27	17	44345047	Imputed	ACT	0.134871	17	43663208		Intergenic
rs117073527	cg17117718	23.8357	6.29e-27	17	44316888	Imputed	G	0.134899	17	43663208		Intergenic
rs117932746	cg22968622	23.8331	6.34e-27	17	44339675	Imputed	C	0.105607	17	43663579		Intergenic
rs147699416	cg17117718	23.8328	6.34e-27	17	44367966	Imputed	T	0.134524	17	43663208		Intergenic
chr17:44256811:I	cg17117718	23.8286	6.42e-27	17	44256811	Imputed	AACAAG	0.135331	17	43663208		Intergenic
rs113173278	cg17117718	23.8258	6.48e-27	17	44360168	Imputed	G	0.134685	17	43663208		Intergenic
rs144784350	cg17117718	23.8258	6.48e-27	17	44361861	Imputed	G	0.134685	17	43663208		Intergenic
rs146928285	cg17117718	23.8258	6.48e-27	17	44362410	Imputed	G	0.134685	17	43663208		Intergenic
rs148140820	cg17117718	23.8258	6.48e-27	17	44361869	Imputed	C	0.134685	17	43663208		Intergenic
rs149088375	cg17117718	23.8258	6.48e-27	17	44362349	Imputed	T	0.134685	17	43663208		Intergenic
rs151047288	cg17117718	23.8258	6.48e-27	17	44360238	Imputed	G	0.134685	17	43663208		Intergenic
rs2732622	cg17117718	23.8258	6.48e-27	17	44361523	Imputed	A	0.134685	17	43663208		Intergenic
rs112565375	cg17117718	23.8252	6.49e-27	17	44356682	Imputed	A	0.134702	17	43663208		Intergenic
rs117205063	cg17117718	23.8252	6.49e-27	17	44354587	Imputed	G	0.134702	17	43663208		Intergenic
rs117233587	cg17117718	23.8252	6.49e-27	17	44354980	Imputed	A	0.134702	17	43663208		Intergenic
rs117526238	cg17117718	23.8252	6.49e-27	17	44356098	Imputed	C	0.134702	17	43663208		Intergenic
rs138908635	cg17117718	23.8252	6.49e-27	17	44356433	Imputed	T	0.134702	17	43663208		Intergenic
rs142817709	cg17117718	23.8252	6.49e-27	17	44354908	Imputed	T	0.134702	17	43663208		Intergenic
rs118114094	cg17117718	23.8245	6.5e-27	17	44316449	Imputed	C	0.134972	17	43663208		Intergenic
rs141775015	cg17117718	23.8247	6.5e-27	17	44363718	Imputed	C	0.13468	17	43663208		Intergenic
rs117689023	cg17117718	23.8189	6.61e-27	17	44176170	Imputed	G	0.135556	17	43663208		Intergenic
rs112340920	cg17117718	23.8168	6.65e-27	17	44290759	Imputed	C	0.135764	17	43663208		Intergenic
chr17:44325225:I	cg17117718	23.8089	6.81e-27	17	44325225	Imputed	AAAT	0.139153	17	43663208		Intergenic
rs113449071	cg17117718	23.8089	6.81e-27	17	44359663	Imputed	T	0.135157	17	43663208		Intergenic
rs140599694	cg17117718	23.8042	6.91e-27	17	44360071	Imputed	C	0.134747	17	43663208		Intergenic
rs113579491	cg17117718	23.7886	7.24e-27	17	44344456	Imputed	C	0.135073	17	43663208		Intergenic
rs142585607	cg17117718	23.7871	7.27e-27	17	44355130	Imputed	G	0.134809	17	43663208		Intergenic
rs148072382	cg17117718	23.7803	7.42e-27	17	44363632	Imputed	C	0.134803	17	43663208		Intergenic
rs112672130	cg17117718	23.7725	7.59e-27	17	44290910	Imputed	G	0.135663	17	43663208		Intergenic
rs112539198	cg17117718	23.7661	7.74e-27	17	44344446	Imputed	T	0.137264	17	43663208		Intergenic
rs139629001	cg17117718	23.7651	7.76e-27	17	44174068	Imputed	C	0.13577	17	43663208		Intergenic
rs112762364	cg17117718	23.7602	7.88e-27	17	44251698	Imputed	A	0.135197	17	43663208		Intergenic
rs116856926	cg17117718	23.7602	7.88e-27	17	44254494	Imputed	C	0.135197	17	43663208		Intergenic
rs117108740	cg17117718	23.7602	7.88e-27	17	44254379	Imputed	T	0.135197	17	43663208		Intergenic
rs117278623	cg17117718	23.7602	7.88e-27	17	44252197	Imputed	T	0.135197	17	43663208		Intergenic
rs117334575	cg17117718	23.7602	7.88e-27	17	44253203	Imputed	C	0.135197	17	43663208		Intergenic
rs117647599	cg17117718	23.7602	7.88e-27	17	44252510	Imputed	C	0.135197	17	43663208		Intergenic
rs117738056	cg17117718	23.7602	7.88e-27	17	44251907	Imputed	T	0.135197	17	43663208		Intergenic
rs117974219	cg17117718	23.7602	7.88e-27	17	44253364	Imputed	A	0.135197	17	43663208		Intergenic
rs118141983	cg17117718	23.7602	7.88e-27	17	44252416	Imputed	C	0.135197	17	43663208		Intergenic
rs138103585	cg17117718	23.7602	7.88e-27	17	44251972	Imputed	A	0.135197	17	43663208		Intergenic
rs140742560	cg17117718	23.7602	7.88e-27	17	44254413	Imputed	G	0.135197	17	43663208		Intergenic
rs148326402	cg17117718	23.7602	7.88e-27	17	44251769	Imputed	G	0.135197	17	43663208		Intergenic
chr17:44352633:D	cg17117718	23.7575	7.94e-27	17	44352633	Imputed	G	0.134985	17	43663208		Intergenic
[truncated: 57,530 more rows]
