# Supplementary material for: Genome-Wide Associations between Genetic and Epigenetic Variation Influence mRNA Expression and Insulin Secretion in Human Pancreatic Islets
Source: PLoS Genet. 2014 Nov 6;10(11):e1004735. doi: 10.1371/journal.pgen.1004735 (PMC4222689; doi:10.1371/journal.pgen.1004735)
Supplement: Table S23 — DNA sequences for pyrosequencing forward, reverse and sequencing primers. (XLSX) [file pgen.1004735.s031.xlsx]

## Sheet: Sheet1
Gene	Probe ID	Forward PCR primer	Reverse PCR primer (biotinylated)	Sequencing primer
GPX7	cg18087326	GGGAGGTAAAAATTTGAGAGTTTAG	TCTTCTCCCAACCATCACTT	GGTATAGGATGGAAGTAA
SNX19	cg08912652	GGTTGGATTTAGAGTGGTGTTAT	TCAAACTTCTACCCCAAAAATACTCATATC	AGTGGTGTTATGGTTTT
